# Supplementary material
Source: PubMed Central journal article supplement (PMC4466750)
Supplement: pnas.1507125112.sapp.pdf [file pnas.1507125112.sapp.pdf]

## **Supplementary Methods**

### ***Tissue dissociation and glial depletion***

Adult brain tissue was obtained during epilepsy surgeries at Stanford Hospital with informed consent under a protocol approved by Stanford University Institutional Review Board. Fetal brain tissue was obtained during elective abortions by Stemexpress Inc., with informed consent under a protocol approved by the Biomedical Research Institute of America Institutional Review Board.

Neurosurgical samples were delivered immediately from the operating room at 4°C (time less than 1 hour). Fetal samples were delivered on ice within 4 hours of procurement. The tissue was enzymatically dissociated to make a suspension of single cells by incubating at 33 °C for 90 minutes in 20 ml of a papain solution containing Earle's balanced salts (EBSS, Sigma, St. Louis, MO, E7510), D(+)-glucose (22.5mM), NaHCO<sub>3</sub> (26mM), DNase (125U/ml, Worthington, Lakewood, NJ, LS002007), papain (9 U/ml, Worthington, Lakewood, NJ, LS03126), and L-cysteine (1mM, Sigma, St. Louis, MO, C7880). The papain solution was equilibrated with 5% CO<sub>2</sub> and 95% O<sub>2</sub> gas before and during papain treatment. Following papain treatment, the tissue was washed three times with 4.5ml of inhibitor buffer containing BSA (1.0mg/ml, Sigma, St. Louis, MO, A-8806), and ovomucoid (also known as trypsin inhibitor, 1.0 mg/ml, Roche Diagnostics Corporation, Indianapolis, IN 109878) and then mechanically dissociated by gentle sequential trituration using a 5ml pipette. Dissociated cells were layered on top of 10ml of high concentration inhibitor solution with 5mg/ml BSA and 5mg/ml ovomucoid and centrifuged at 130g for 5 minutes. The cell pellet was then resuspended in 12 ml Dulbecco's phosphate-buffered saline (DPBS, Invitrogen, Carlsbad, CA 14287) containing 0.02% BSA and 12.5U/ml DNase and filtered through a 20um Nitex mesh (Sefar America Inc., Depew NY, Lab Pak 03-20/14) to remove undissociated cell clumps. Cell health was assessed by trypan blue exclusion.

After dissociation of adult cortex, the cell suspension contained significant amounts of myelin debris and vascular macrophages. To deplete these populations, we immunopanned the single cell suspension on plates containing antibodies against CD45 (BD Pharmingen 550539, 1.25µg in 12ml of DPBS/0.2% BSA; 30 minute incubation) followed by two sequential plates containing anti GalC hybridoma

antibodies (10 minute incubation each). These quick depletion steps drastically reduced myelin contamination and enriched the suspension for neural cell types.

### ***Single cell capture, cDNA preparation and library preparation for next generation sequencing***

Following depletion cells were counted and diluted to 750-1000 cells per microliter. Cells were loaded, captured and stained using viability dyes (LIVE/DEAD cell viability assay; Molecular Probes, Life Technologies) on a medium-sized (10-17 um cell diameter) microfluidic RNA-seq chip (Fluidigm) using the Fluidigm C1 system. Upon capture cells were imaged using phase-contrast and fluorescence microscopy. Lysis, reverse transcription and cDNA preamplification was performed using the SMARTer Ultra Low RNA Kit for the Fluidigm C1 System (Clontech) according to Fluidigm's manual for mRNA sequencing on the C1 system. Resulting cDNA was harvested and analyzed on the Fragment analyzer<sup>TM</sup> automated fragment analyzer by Advanced Analytical. Only cells that showed no signs of RNA degradation and had a concentration higher than 0.05 ng/ul were selected for library preparation. Library preparation was performed using Nextera XT DNA Sample Preparation Kit (Illumina) as described in the Fluidigm manual. Following library preparation, cells were pooled and sequenced on an Illumina NextSeq instrument using 2x75 paired end reads on a NextSeq high output kit (Illumina).

### ***Processing of mRNA sequencing data***

We first used Prinseq to remove short reads (-min\_len 30) trim the first 10 bp on the 5'-end (-trim\_left 10), trim reads with low quality on the 3'-end (-trim\_qual\_right 25) and filter low complexity reads (-lc\_method entropy \-lc\_threshold 65). We used FASTQC to determine overrepresented sequences and removed those using cutadapt (-e 0.15 -m 30). We then used Prinseq to remove orphan pairs less than 30bp in length followed by removal of nextera adapters using Trim Galore (--stringency 1). Remaining reads were aligned to the hg19 genome with STAR using the following options (-outFilterType BySJout \--outFilterMultimapNmax 20 \--alignSJoverhangMin 8 \--alignSJDBoverhangMin 1 \--outFilterMismatchNmax 999 \--outFilterMismatchNoverLmax 0.04 \--alignIntronMin 20 \--alignIntronMax 1000000 \--alignMatesGapMax 1000000 \--outSAMstrandField intronMotif ). Aligned reads

were converted to counts for every gene using HTSeq (-m intersection-nonempty \-s no). The counts of all genes for any given cell were converted to counts per million (CPM) by dividing with the total number of reads and multiplying by  $10^6$  followed by conversion to a log base 10.

### ***Data analysis***

Data analysis was performed using R. Prior to analysis we excluded cells that had less than 400000 reads, reducing the initial dataset of 482 cells to 466. Pairwise distances between cells were calculated as described in (1) and as implemented in the scde package. Dimensionality reduction of the distances was performed using ViSNE (2) as implemented in the tsne package and subsequent clustering was performed using the Bayesian information criterion (BIC) for parameterized Gaussian mixture models fitted by EM algorithm initialized by model-based hierarchical clustering as implemented in the mclust package (3). Minimum spanning trees, community identification and computation of longest paths were generated using the package igraph (4). Principal components analysis (PCA) was performed using the package FactoMineR (5).

### ***In situ staining***

#### **Tissue preparation**

Fresh surgical samples of adult human cortex were fixed overnight at 4C in 4% PFA. After fixation, the tissue was immersed in 30% sucrose at 4C for two days before embedding in OCT and sectioning at a thickness of 10  $\mu$ M. Sections were mounted on slides and frozen for later use.

#### **Antibody staining**

Frozen tissue sections were thawed and incubated in 1xPBS for 10 mins at RT, prior to blocking with 1xPBS containing 10% donkey serum and 0.1% Triton X100 for one hour at RT. Primary antibodies were diluted in blocking buffer and incubated overnight at 4°C. Slides were washed three times with 1xPBS. Donkey-derived secondary antibodies were diluted in blocking buffer and incubated on the tissue sections for 90mins at RT, followed by three washes in 1xPBS. A full list of all antibodies and their respective dilutions can be found in **Table S6**. Tissue sections were incubated in Sudan Black B (.7g SBB in 70% ethanol) for 10 minutes to

eliminate the nonspecific signal produced from abundant lipofuscin in human brain sections. Following SBB treatment, the tissue was washed three times in PBS and embedded in VECTASHIELD mounting medium (VECTOR laboratories) containing DAPI, prior to examination by fluorescence microscopy. All images were analyzed using ImageJ.

## References

1. Kharchenko PV, Silberstein L, Scadden DT (2014) Bayesian approach to single-cell differential expression analysis. *Nat Meth* 11:740–742.
2. Amir E-AD et al. (2013) viSNE enables visualization of high dimensional single-cell data and reveals phenotypic heterogeneity of leukemia. *Nature Biotechnology* 31:545–552.
3. Fraley C, Raftery AE (1999) MCLUST: Software for Model-Based Cluster Analysis. *J of Classification* 16:297–306.
4. Csardi G, Nepusz T (2006) The igraph software package for complex network research. *InterJournal*.
5. Lê S, Josse J, Husson F (2008) *FactoMineR: an R package for multivariate analysis* (Journal of statistical software).

## Supporting Figure Legends

**Fig S1.** Histograms showing total number of reads, fraction of mapped reads, Intron/Exon ratio and gene body coverage for a total of 466 cells.

**Fig S2.** (A) BIC classification using different models identifies ten clusters of cells. EII corresponds to a spherical model with equal volume and equal shape, VII corresponds to a spherical model with variable volume and equal shape, EEI corresponds to a diagonal model with equal volume and equal shape, VEI corresponds to a diagonal model with variable volume and equal shape, EVI corresponds to a diagonal model with equal volume and variable shape, VVI corresponds to a diagonal model with variable volume and variable shape, EEE corresponds to a ellipsoidal model with equal volume and equal shape, EEV corresponds to a ellipsoidal model with equal volume and equal shape, VEV corresponds to a ellipsoidal model with variable volume and equal shape and VVV corresponds to a ellipsoidal model with variable volume and variable shape (B) Uncertainty of classification within members of each cluster.

**Fig S3.** Fold enrichment and number of mouse brain derived cell-type specific genes used in the hierarchical clustering

**Fig S4.** Number of detected genes plotted against the fraction of cells expressing each gene. Inlet shows the number of genes detected in at least 50% of the cells for each biased group of cells that was assigned to a known cell type.

**Fig S5.** Mean expression of all cell-type specific genes in each of the biased groups.

**Fig S6.** Images acquired in the C1 microfluidic device for a number of cells identified as members of the group of cells expressing both astrocytic and neuronal genes.

**Fig S7.** Co-staining for NeuN and PVALB in mouse and human cortical sections. Images were taken using a 20X objective and scale bars correspond to 100um. Barplot shows the fraction of PVALB positive cells among the NeuN positive cells for mouse and human respectively. Star indicates significance at  $p < 10^{-5}$ .

**Fig S8.** (A) Enrichment of VIP and TAC3 in interneuron community six. (B) Enrichment and co-expression of PAX6 and RELN in interneuron community one. (C) Enrichment and of CPLX3 and SPARC in interneuron community three and co-staining for CPLX3 and NeuN in human cortical sections.

**Fig S9.** Minimum spanning trees for all fetal cells indicating the longest path across the tree and the expression of genes FAT3 and EGR1 that appear to change gradually across the longest path.

**Fig S10.** Correlation plots for genes of the MHCI pathway for all adult and fetal neuronal cells, microglia and endothelial cells. The diagonal shows expression distribution of each gene in cell type. Both upper and lower panels show pairwise correlations between each marker. The last column shows boxplots of expression for each gene per cell type.

**Fig S11.** Fraction of cells expressing different numbers of MHCI related genes in fetal and adult neurons, endothelial cells and microglia. MHCI related genes are B2M, CALR, ERAP1, HLA-A, HLA-B, HLA-C, HSPA5, PDIA3, SEC61A1, SEC61A2, SEC61B, SEC61G, TAP2 and TAPBP.

Fig S1

**Number of reads per cell**

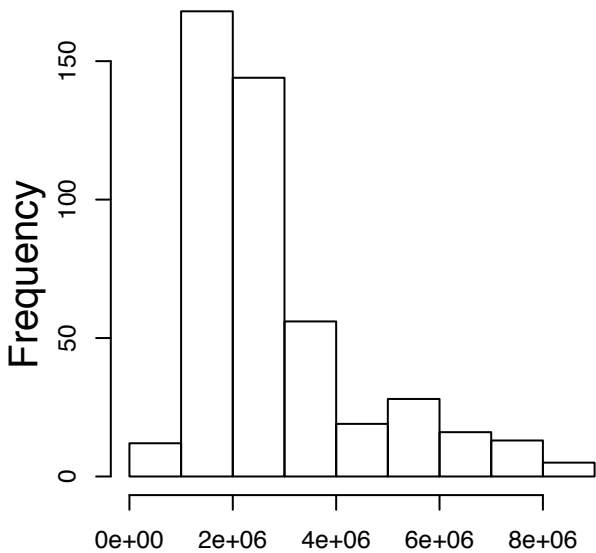

**Fraction of mapped reads**

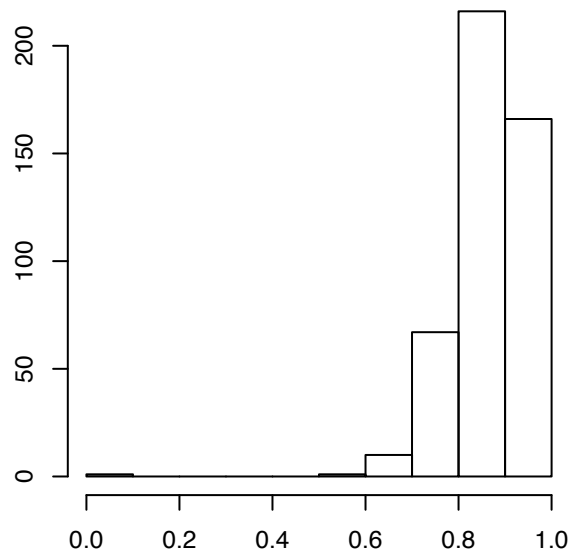

**Intron/Exon ratio**

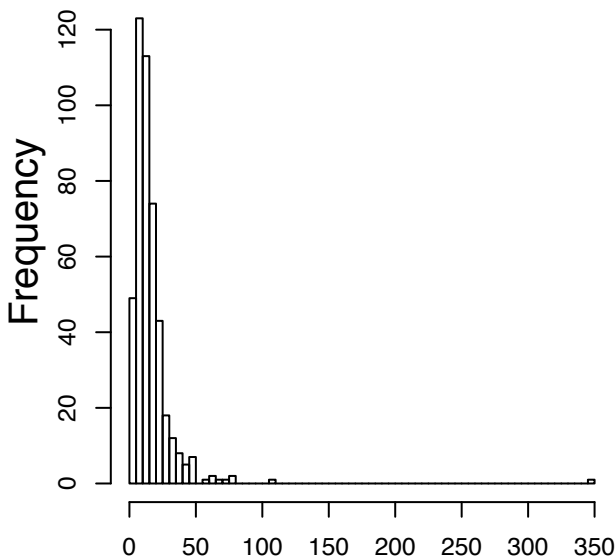

**Gene body coverage**

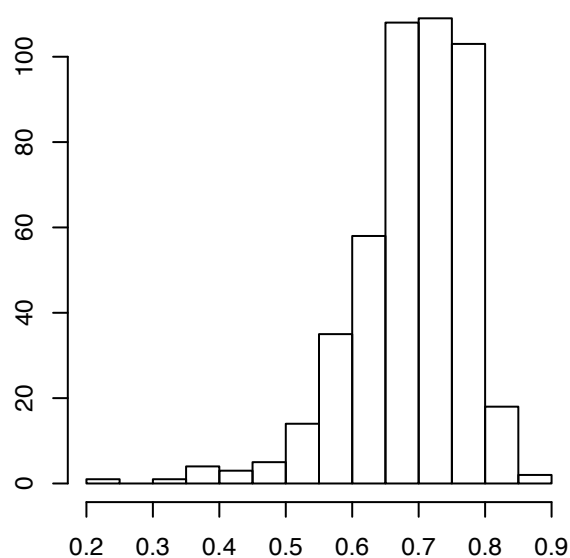

Fig S2

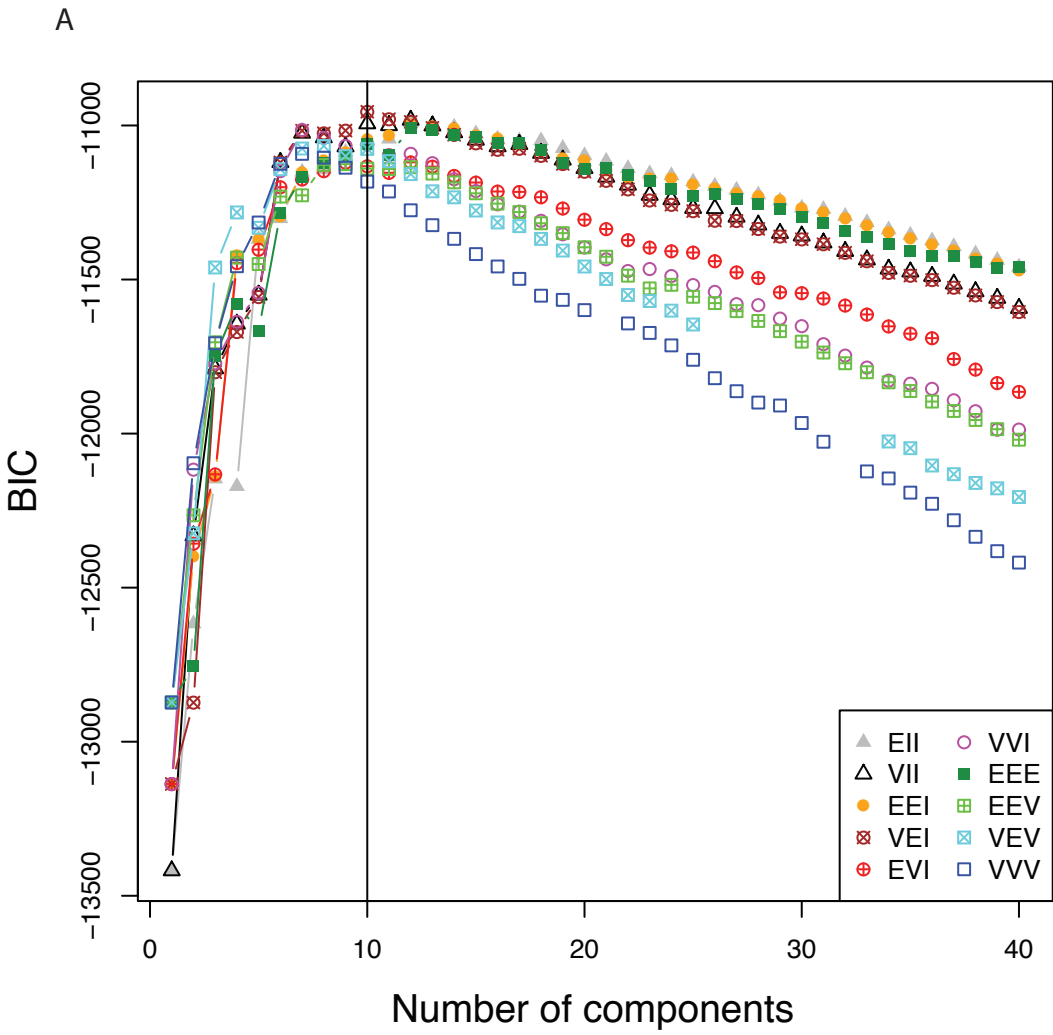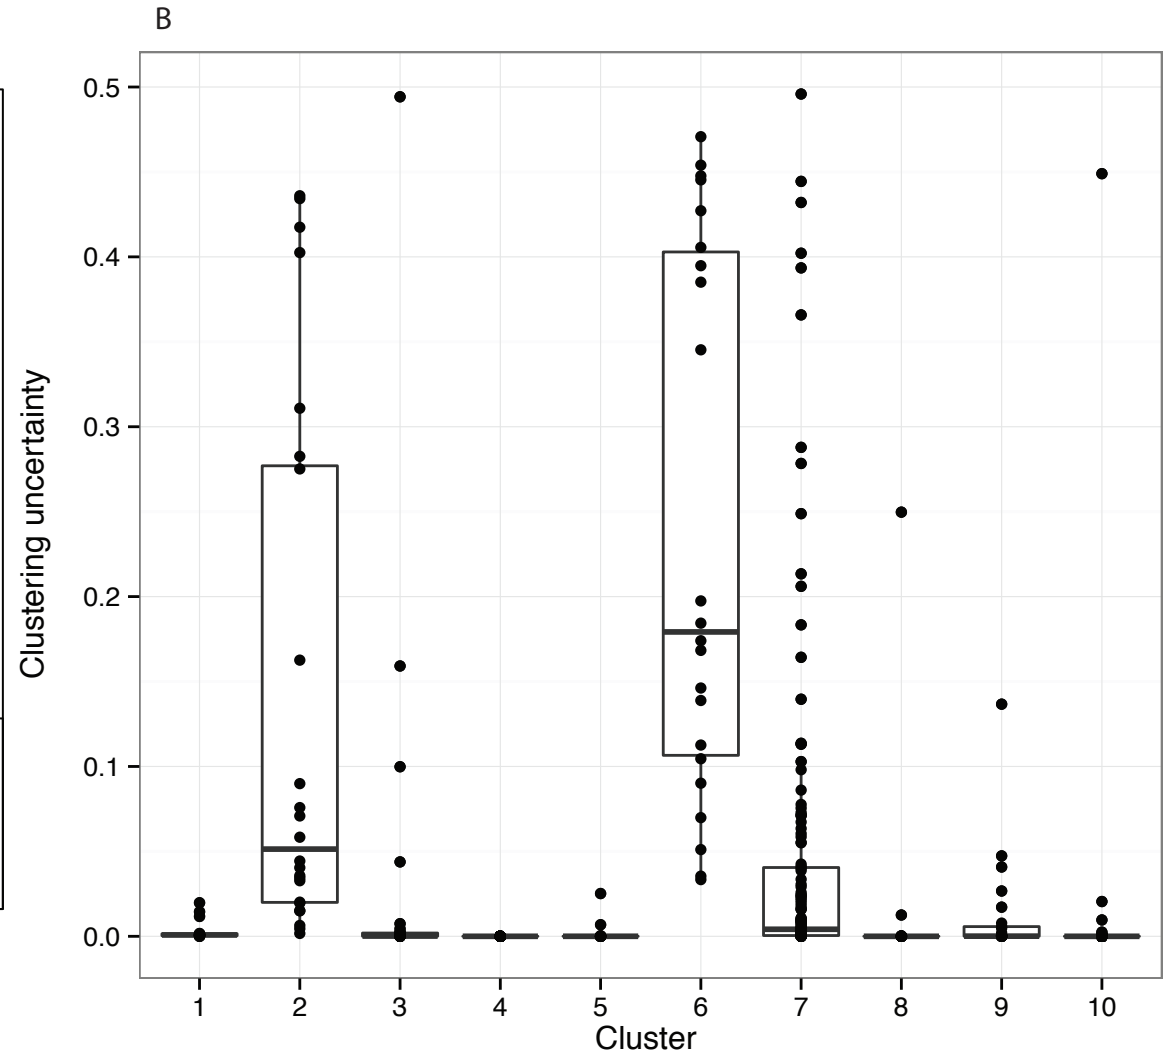



Fig S3

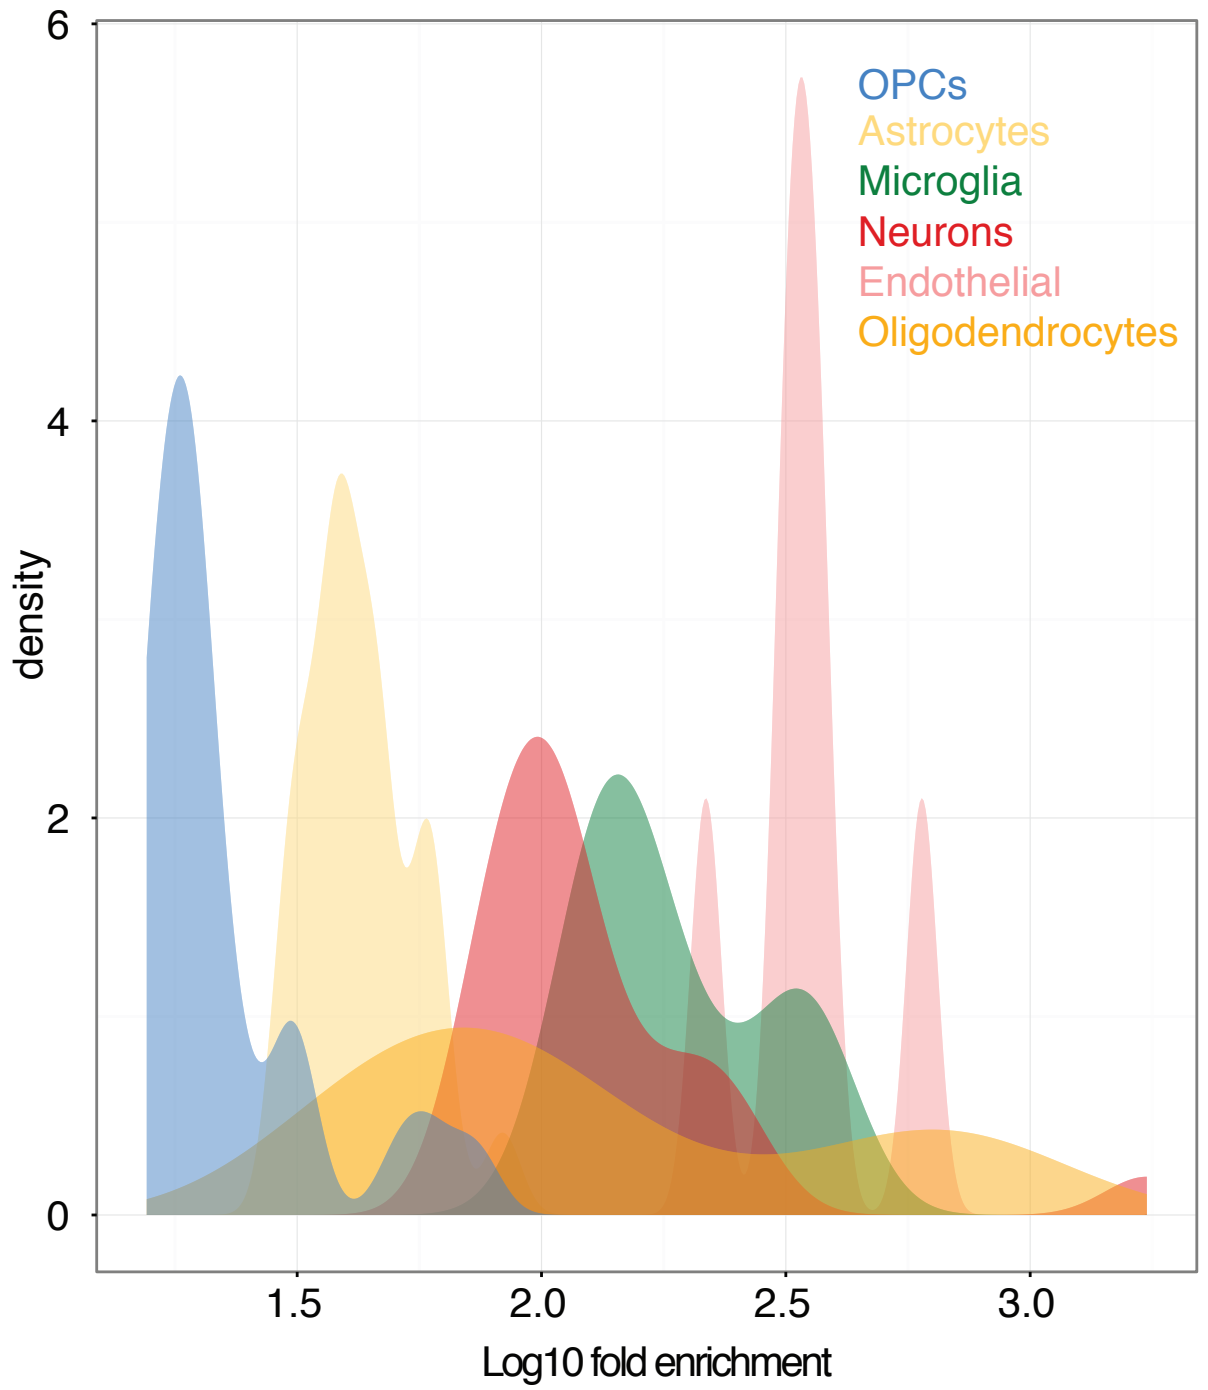

Fig S4

### Genes detected vs percent cells

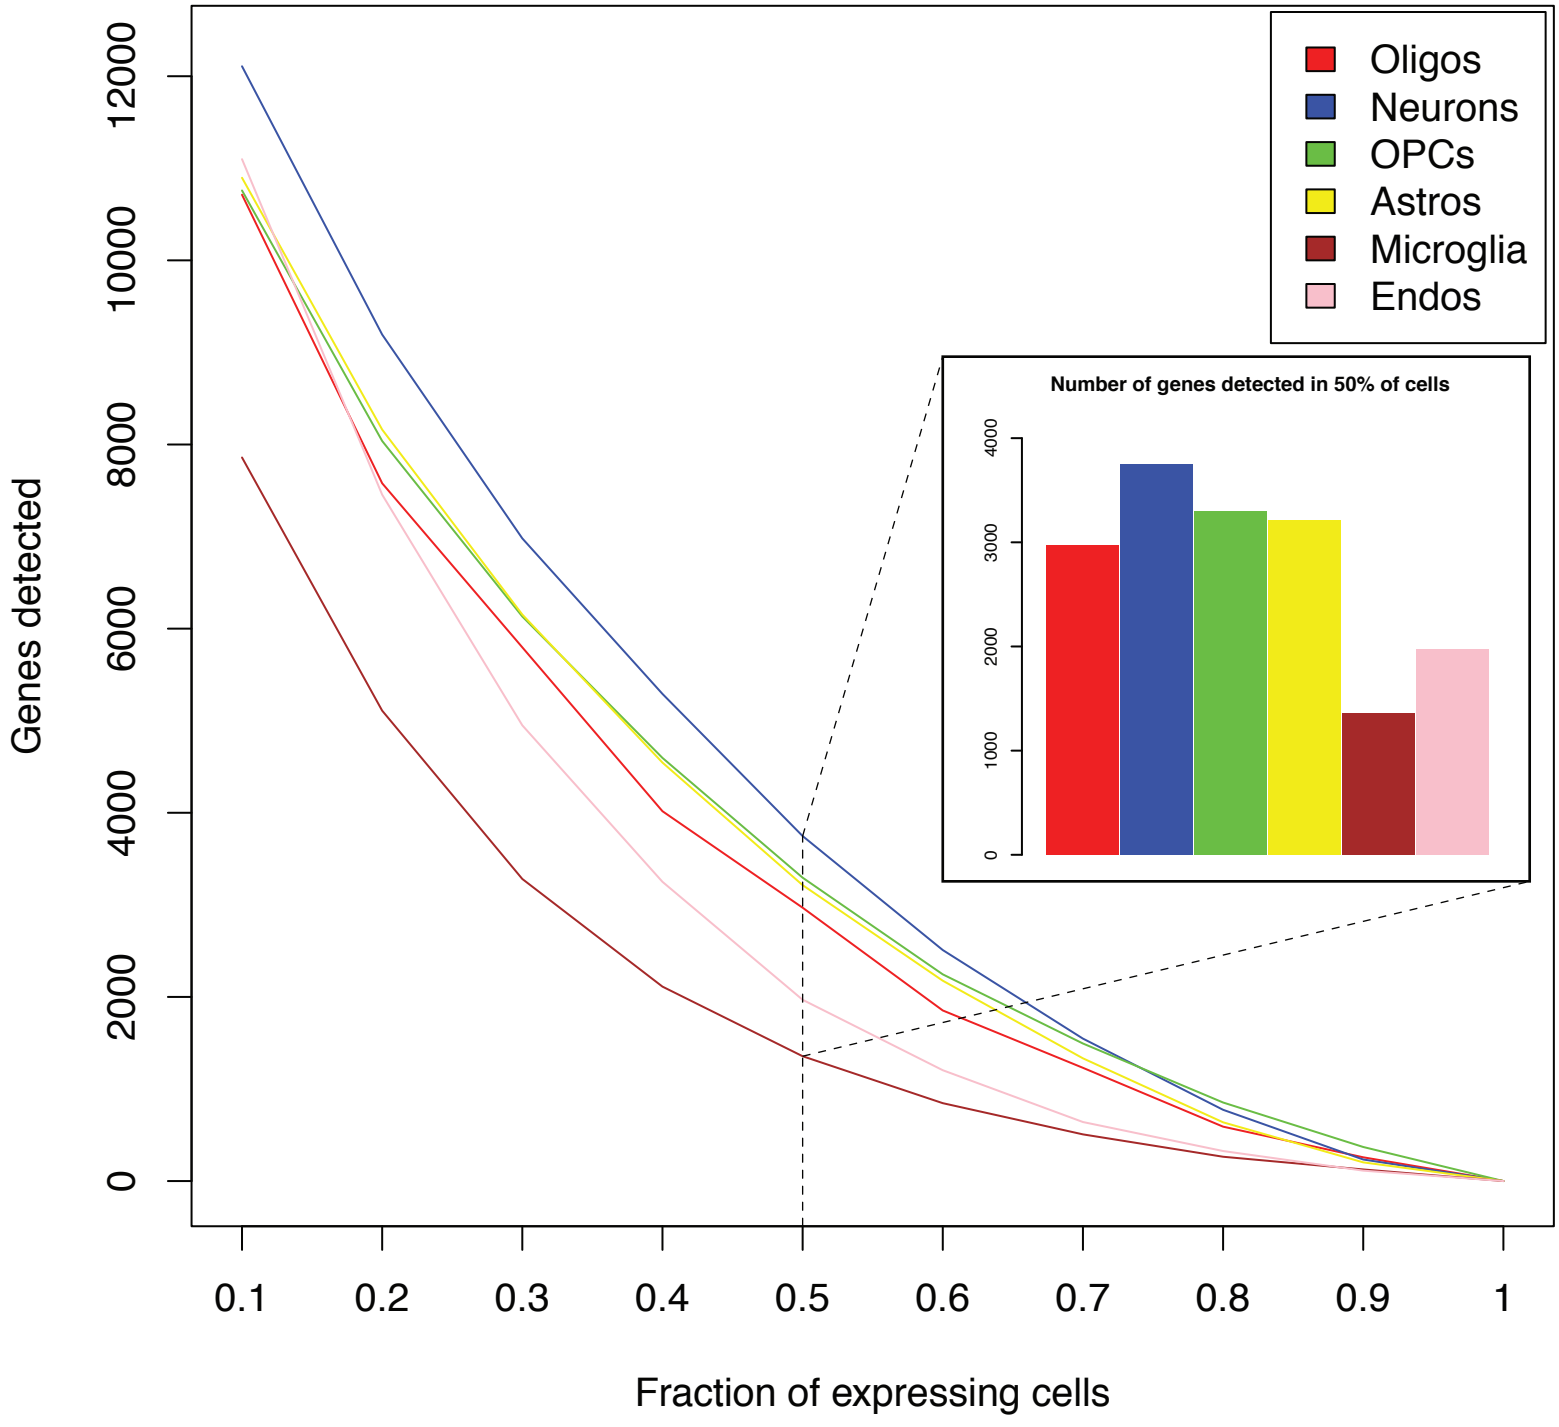

Fig S5

Astrocyte enriched genes

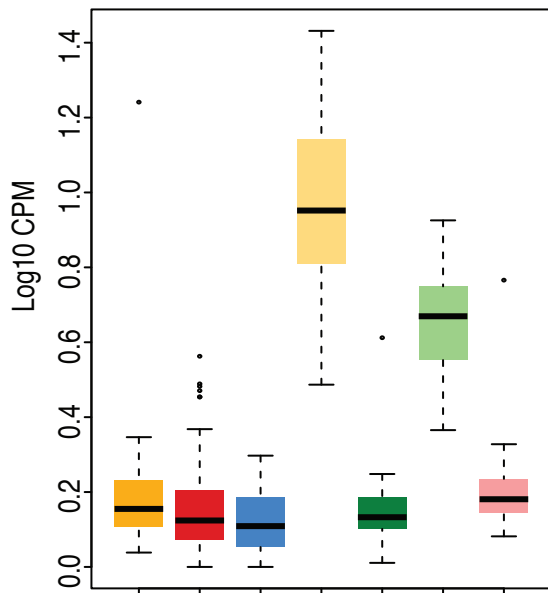

OPC enriched genes

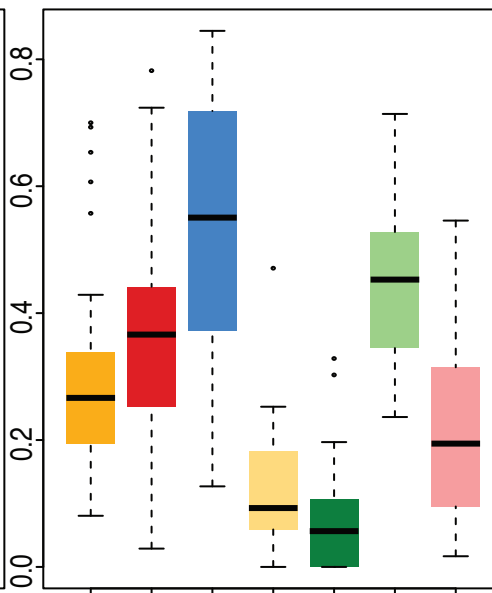

Endothelial enriched genes

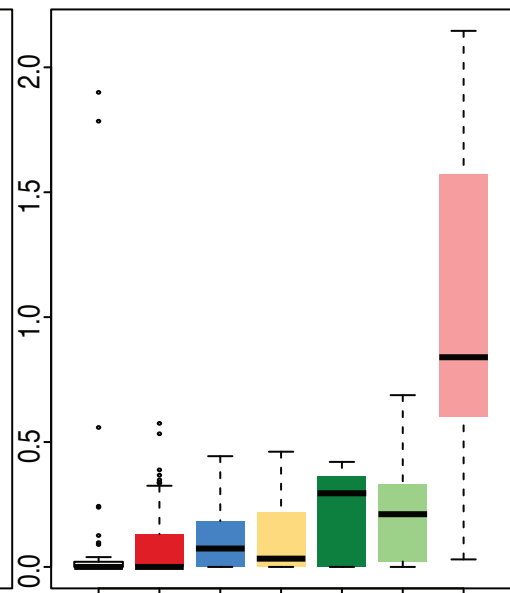

Neuron enriched genes

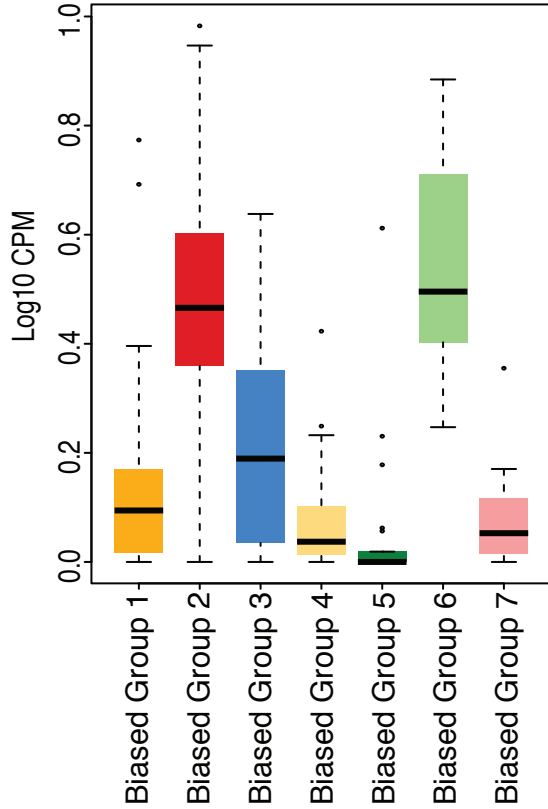

Microglia enriched genes

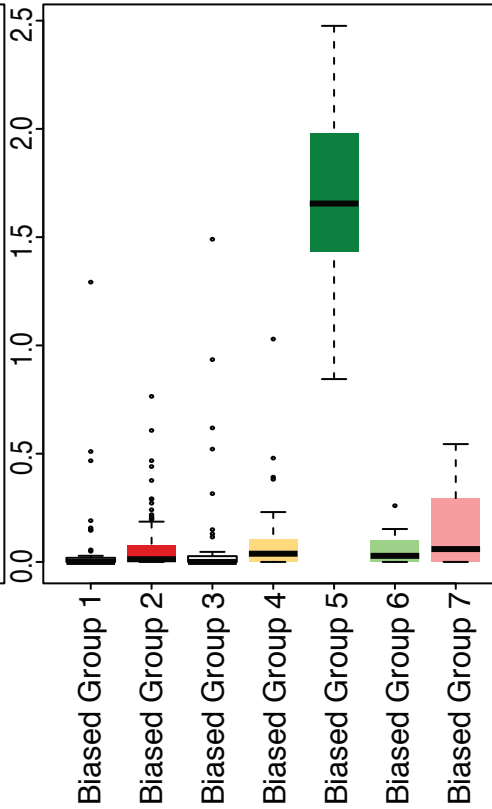

Oligodendrocyte enriched genes

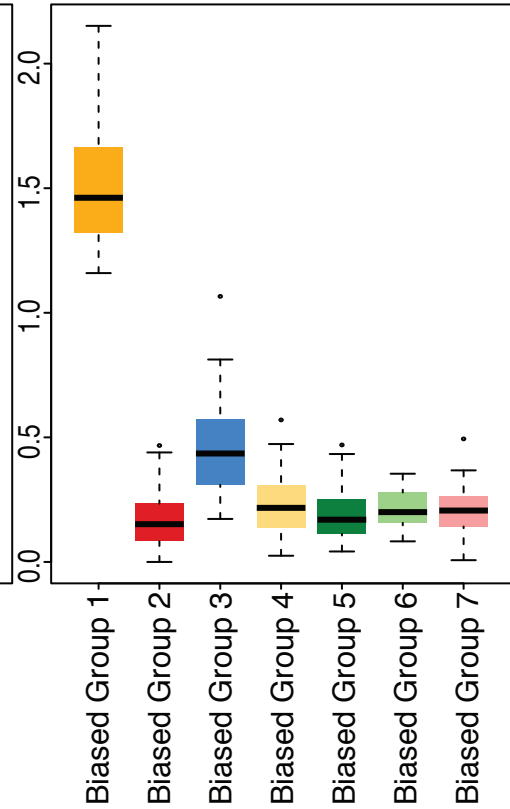

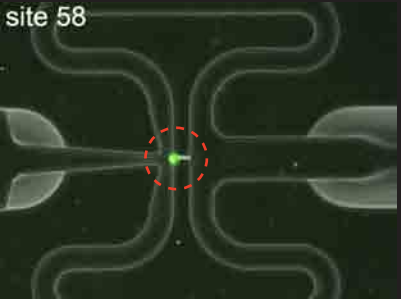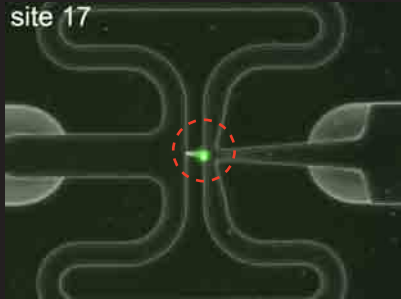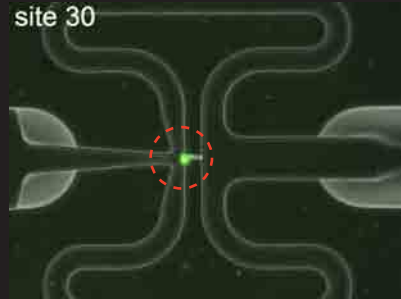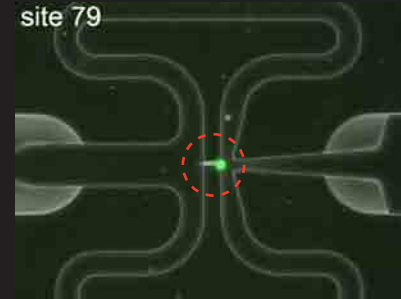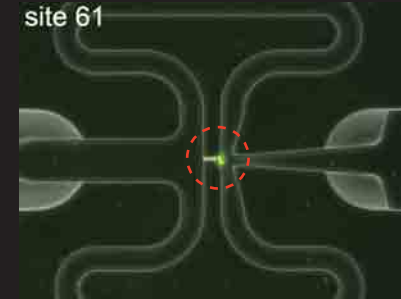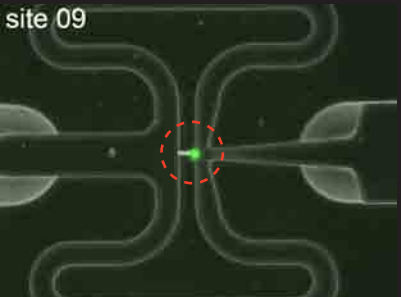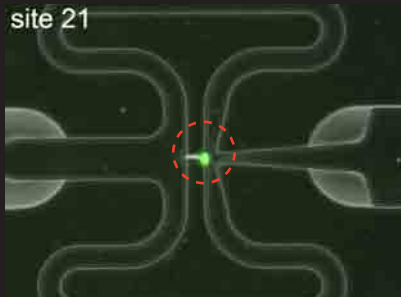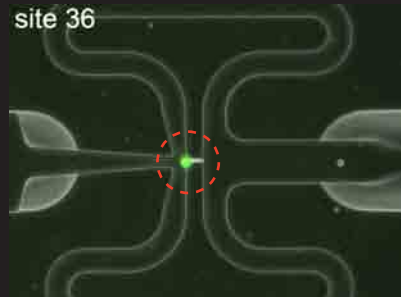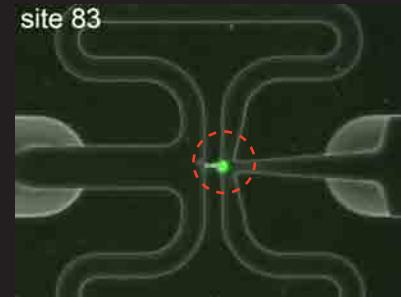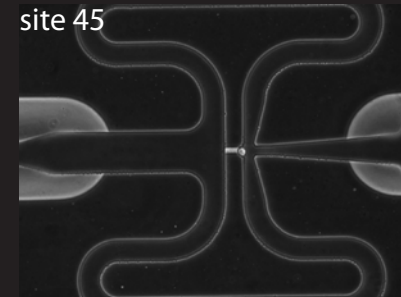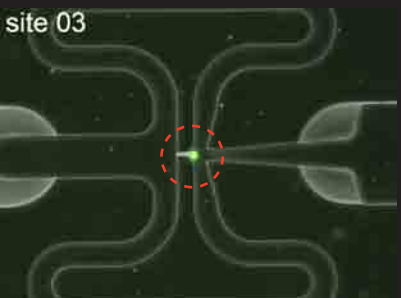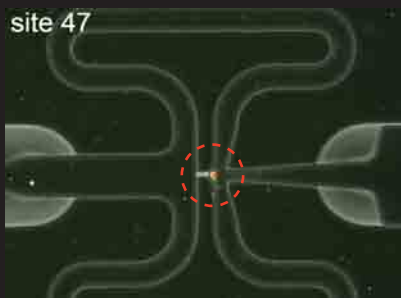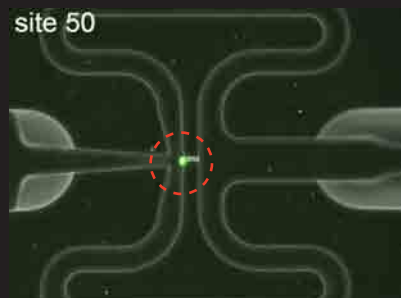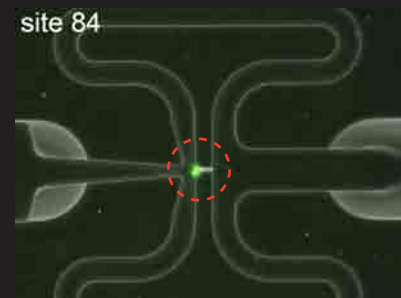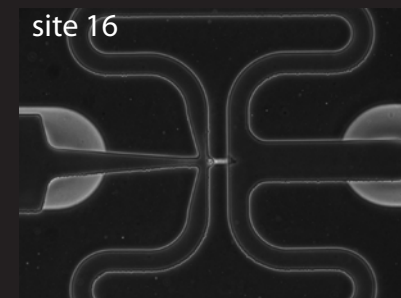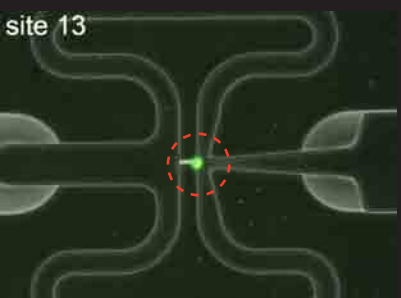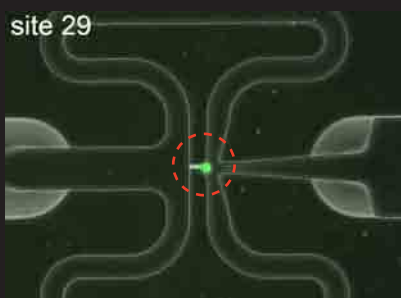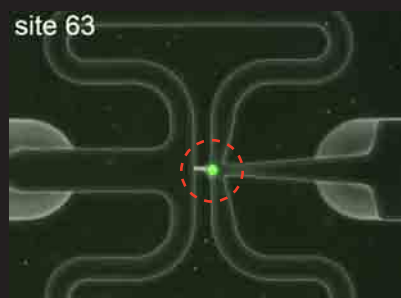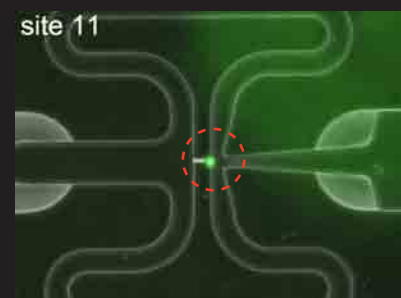

Fig S7

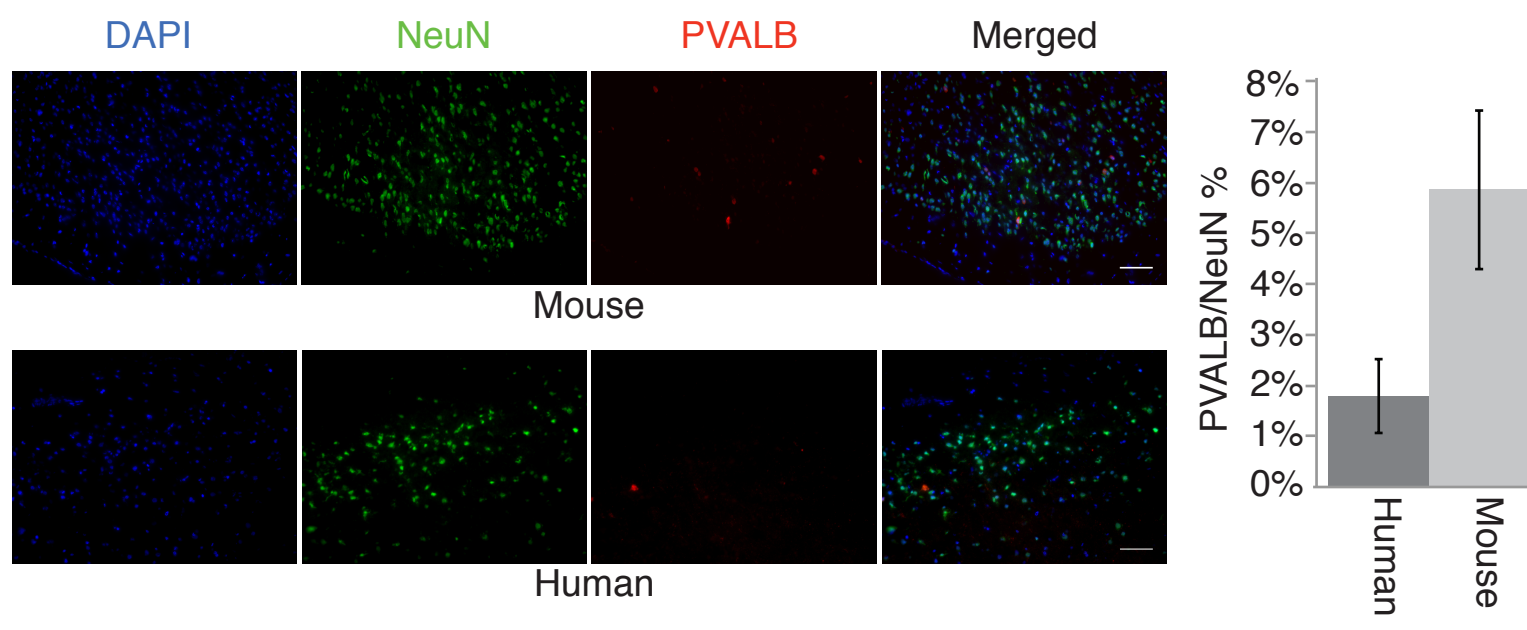

Fig S8

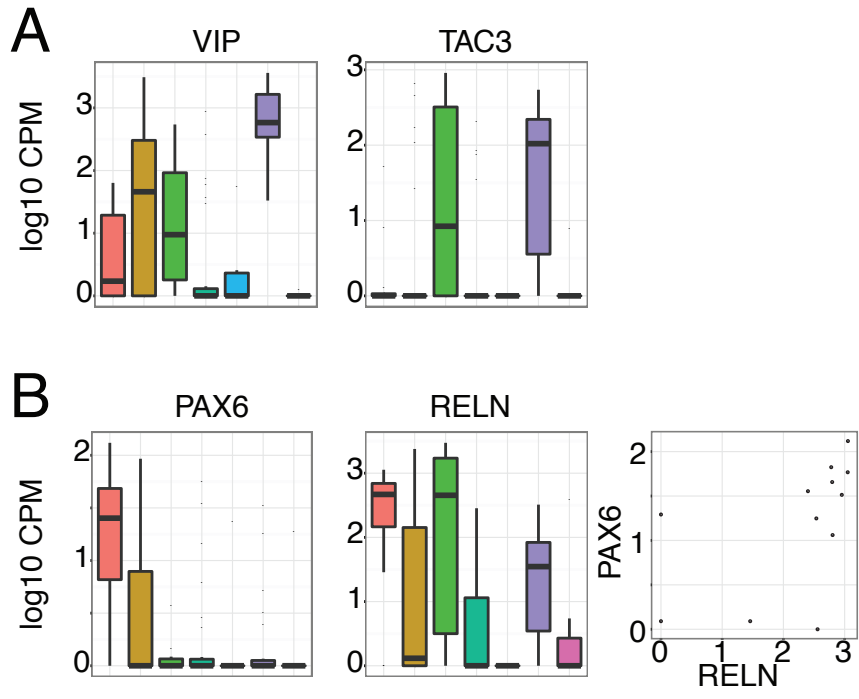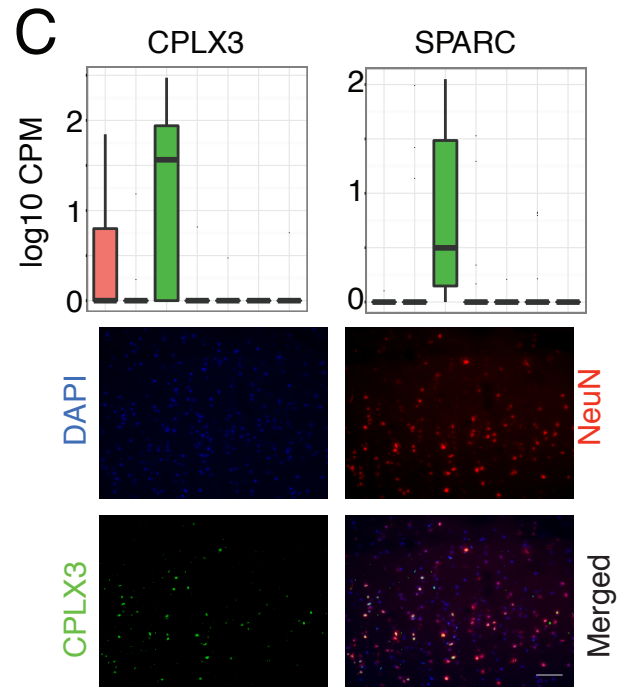

Fig S9

All fetal cells

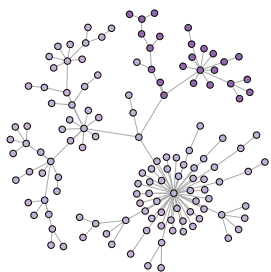

Longest path

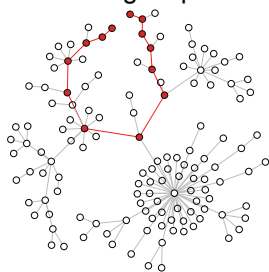

- Fetal neurons (cluster 9, replicating)
- Fetal neurons (cluster 10, quiescent)

FAT3

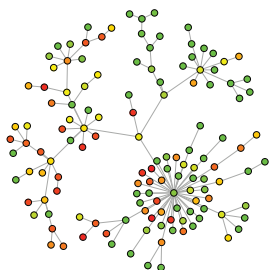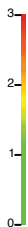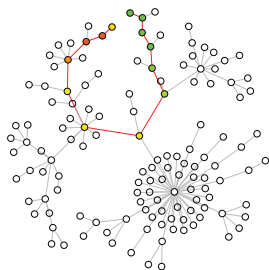

EGR1

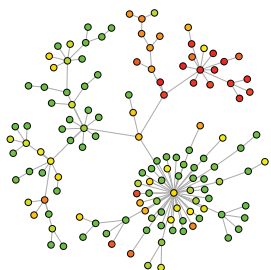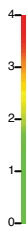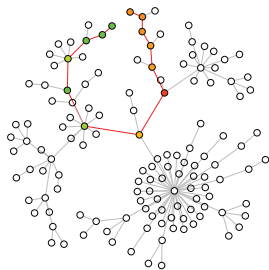

Fig S10

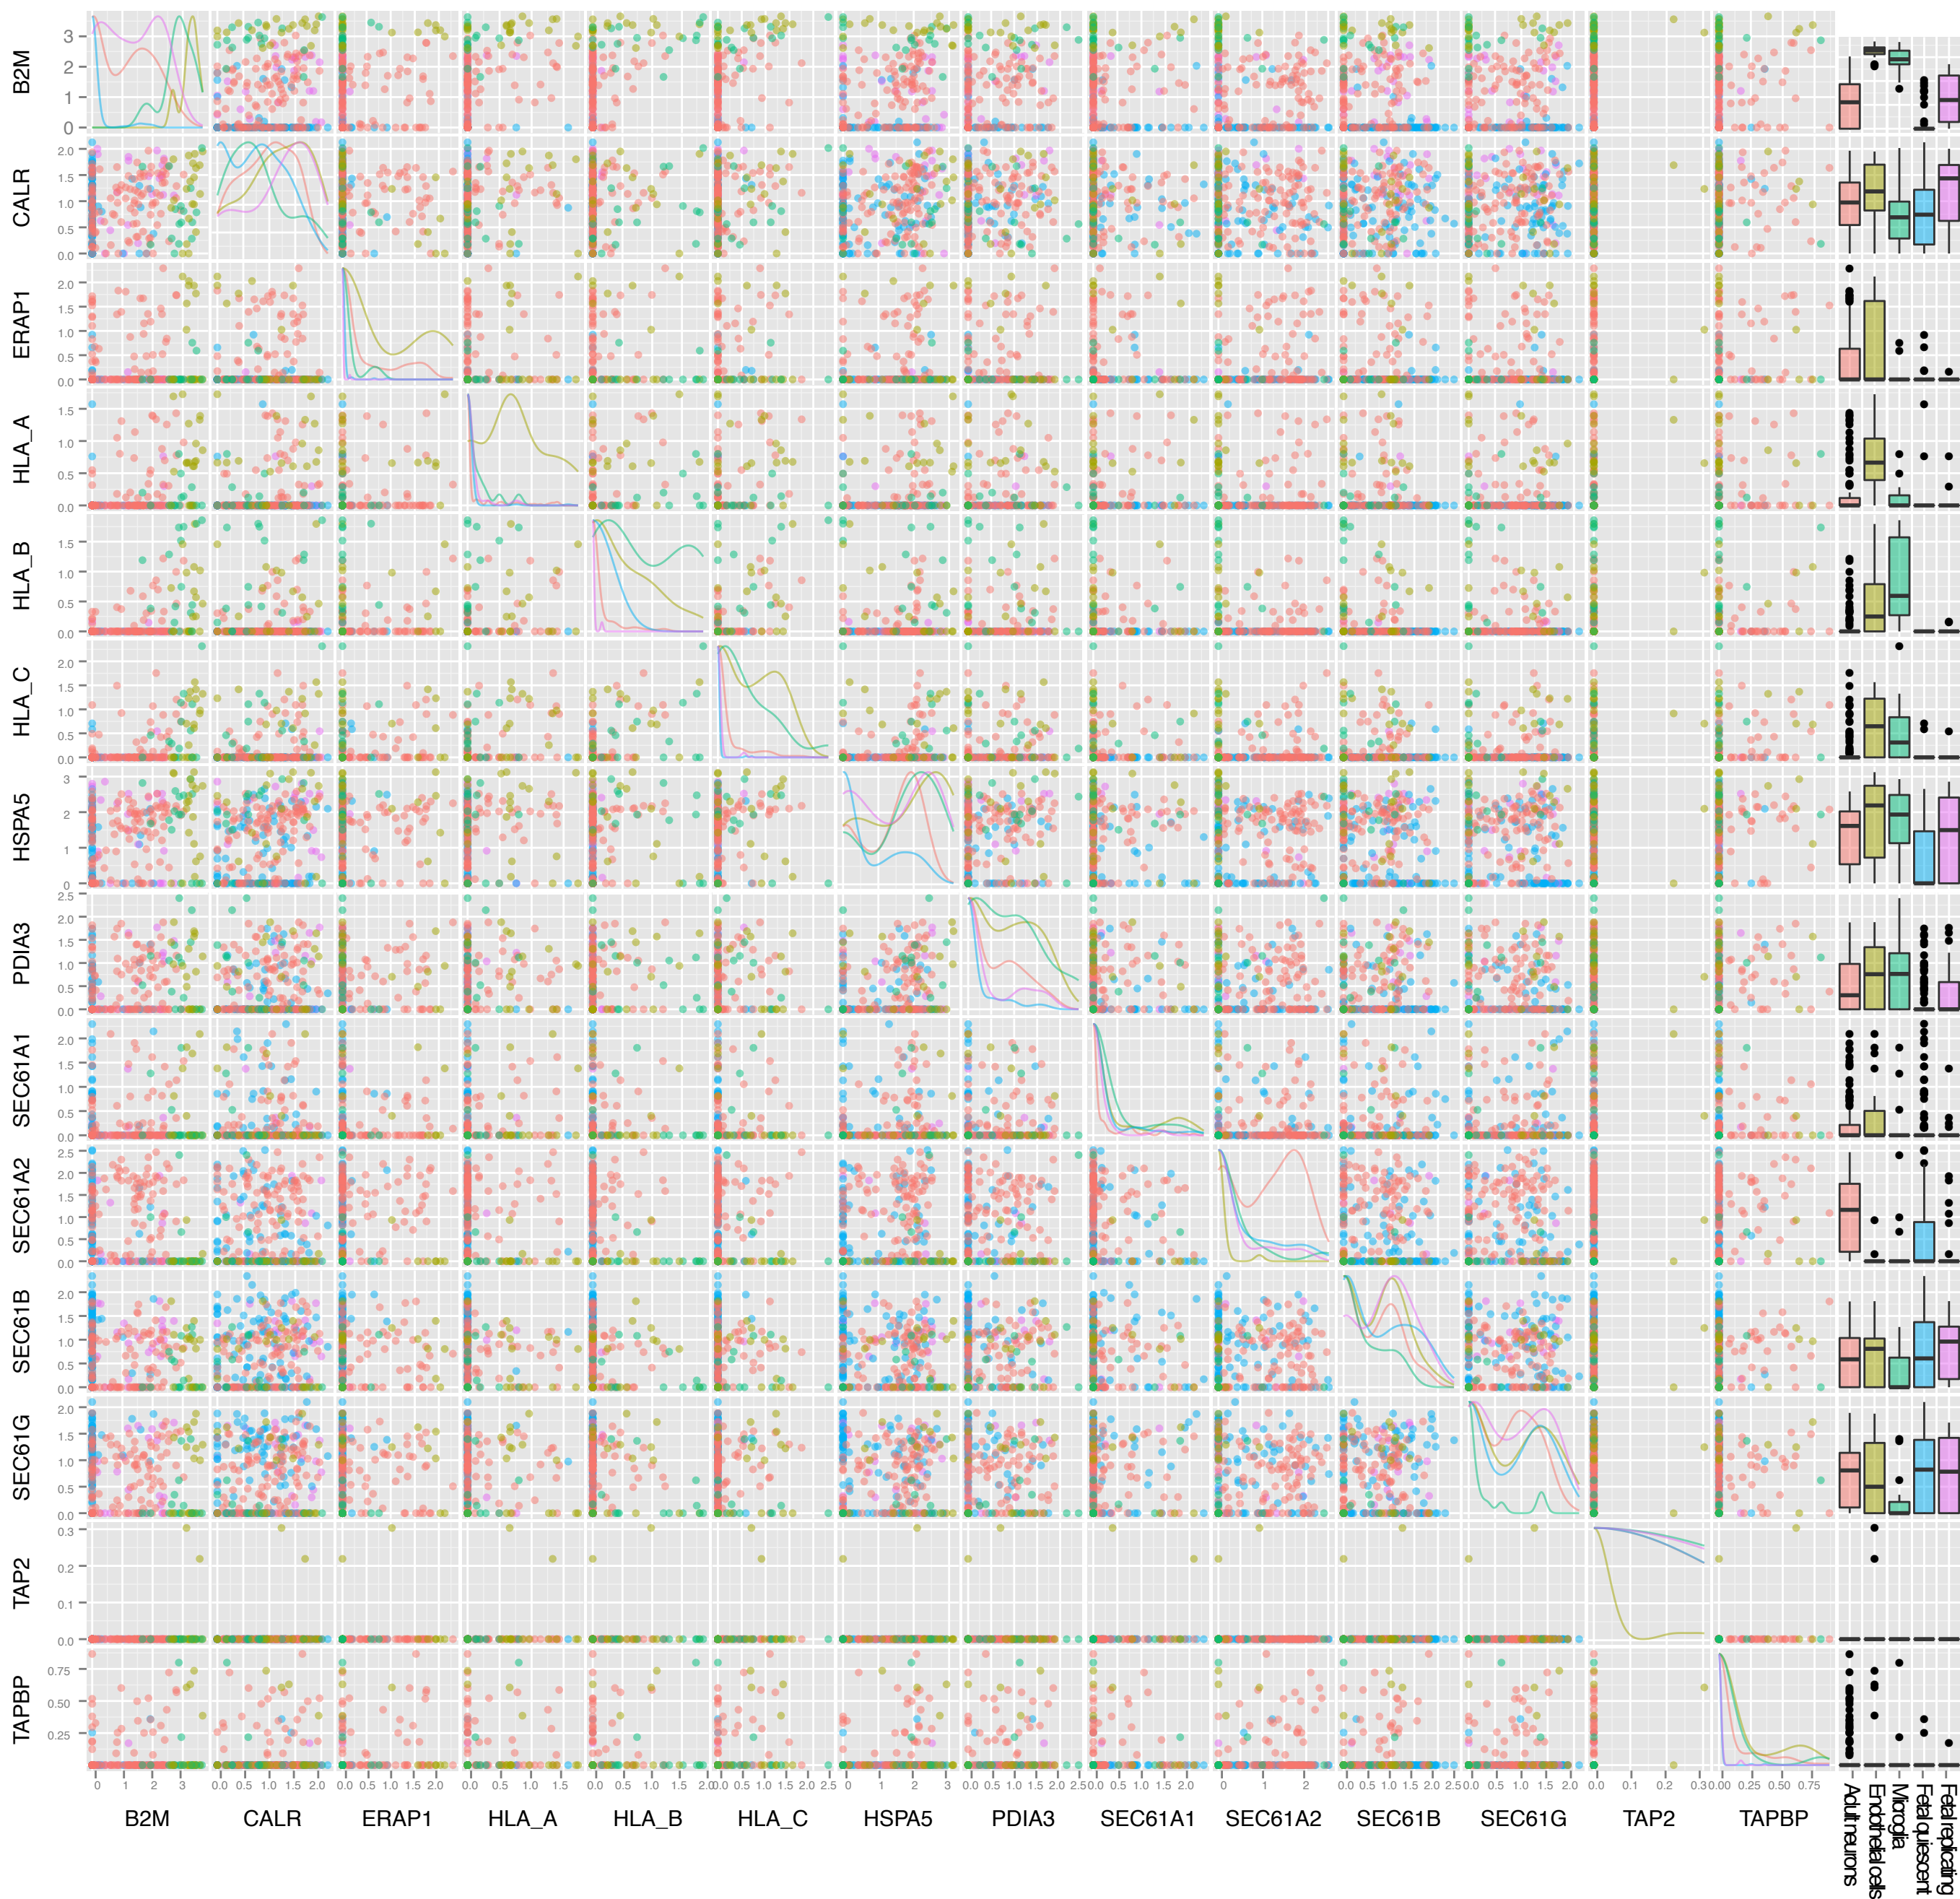



Fig S11

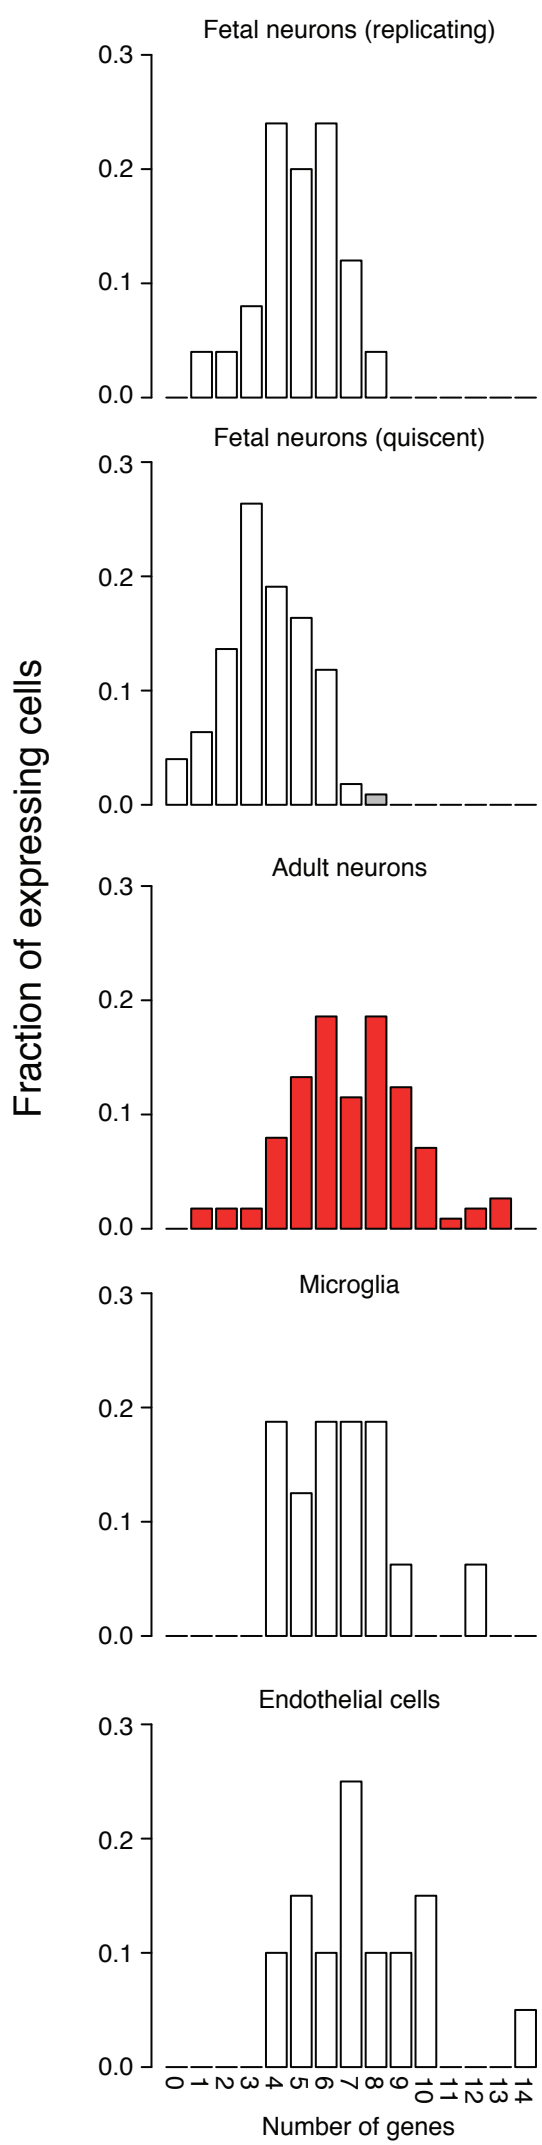

**Table S1.** Information for each surgical sample that was included in the study.

| <b>Experiment name</b> | <b>Number of cells</b> | <b>Number of cells after QC</b> | <b>Sample type</b> | <b>Age</b> | <b>Sex</b> |
|------------------------|------------------------|---------------------------------|--------------------|------------|------------|
| AB_S1                  | 24                     | 24                              | Adult              | 47         | M          |
| AB_S2                  | 5                      | 5                               | Adult              | 63         | M          |
| AB_S3                  | 4                      | 4                               | Adult              | 22         | M          |
| AB_S4                  | 79                     | 77                              | Adult              | 50         | M          |
| AB_S5                  | 45                     | 44                              | Adult              | 63         | M          |
| AB_S7                  | 60                     | 57                              | Adult              | 21         | F          |
| AB_S8                  | 61                     | 58                              | Adult              | 54         | F          |
| AB_S11                 | 68                     | 63                              | Adult              | 37         | F          |
| FB_S1                  | 27                     | 26                              | Fetal              | 16-18w     |            |
| FB_S2                  | 47                     | 46                              | Fetal              | 16-18w     |            |
| FB_S3                  | 33                     | 33                              | Fetal              | 16-18w     |            |
| FB_S6                  | 29                     | 29                              | Fetal              | 16-18w     |            |
| <b>Total</b>           | <b>482</b>             | <b>466</b>                      |                    |            |            |

**Table S2.** Number of cells belonging to each of the unbiased groups

| Unbiased group | Number of cells |
|----------------|-----------------|
| 1              | 18              |
| 2              | 24              |
| 3              | 38              |
| 4              | 62              |
| 5              | 16              |
| 6              | 22              |
| 7              | 131             |
| 8              | 20              |
| 9              | 25              |
| 10             | 110             |

**Table S3.** List of top 20 enriched genes in each of the unbiased groups.

| Cluster 1 | Cluster 2 | Cluster 3 | Cluster 4 | Cluster 5 | Cluster 6 | Cluster 7 | Cluster 8 | Cluster 9 | Cluster 10 |
|-----------|-----------|-----------|-----------|-----------|-----------|-----------|-----------|-----------|------------|
| C1orf129  | GPR17     | KLK6      | AGXT2L1   | CD53      | HTR2C     | TMEM130   | IFITM1    | MKI67     | CD24       |
| PDGFRA    | PLP1      | ERMN      | FGFR3     | ITGAX     | PROX1     | GABRB2    | ITIH5     | TOP2A     | DCX        |
| LRRK2     | FERMT1    | UGT8      | AQP4      | OLR1      | SLC10A4   | VSNL1     | APOLD1    | KIAA0101  | NEUROD6    |
| LHFPL3    | LIMS2     | TF        | GJA1      | FCGR3A    | CALB2     | GABRA1    | TM4SF1    | CDK1      | SOX11      |
| PCDH15    | PLD5      | CNDP1     | AGT       | C3        | KCNT2     | SYNPR     | PTRF      | RRM2      | SATB2      |
| BLM       | C1orf173  | OPALIN    | MGST1     | IL1B      | TTY15     | THY1      | ANXA1     | TFAP2C    | TMSB15A    |
| LAMB4     | C2orf88   | RNASE1    | SLC39A12  | CCL3      | GJA1      | CAMK2A    | PEAR1     | HIST1H1B  | STMN2      |
| MEGF11    | HRASLS    | ENPP2     | SLC25A18  | CCL4      | EDNRB     | MEG3      | SDPR      | CENPF     | DPYSL3     |
| B3GNT7    | C1orf192  | MAG       | GPR98     | LILRB4    | COL21A1   | GABRG2    | GNG11     | BIRC5     | SOX4       |
| IL1RAP    | SLC2A13   | CARNS1    | SLCO1C1   | C3AR1     | VIP       | CKMT1B    | FOXC1     | TNC       | BCL11A     |
| SEMA5A    | GPNMB     | MOBP      | SDC4      | LAPTM5    | TGFB2     | CCK       | ESAM      | NUSAP1    | MEX3A      |
| CRISPLD2  | HS6ST2    | CLDN11    | GPR37L1   | DHRS9     | PTHLH     | CHGB      | IFI27     | AURKB     | NREP       |
| XYLT1     | KY        | C11orf9   | ACSBG1    | PLEK      | AQP4      | SCG2      | GPR116    | CASC5     | HN1        |
| HAS2      | ZNF268    | DBNDD2    | SFXN5     | ALOX5AP   | CLDN18    | DNM1      | MSX1      | UBE2C     | NNAT       |
| TNR       | DNER      | CAPN3     | BMPR1B    | CD74      | NLGN4Y    | MAP7D2    | TGM2      | EOMES     | TUBA1A     |
| GALR1     | HR        | FOLH1     | ATP13A4   | MSR1      | IGFBP5    | CELF4     | CEBPD     | PBK       | SLA        |
| RAB31     | C2orf27A  | LPAR1     | RANBP3L   | PTPRC     | KDM5D     | CIT       | TBX3      | MLF1IP    | MN1        |
| SH2D4A    | NRIP3     | GJB1      | GJB6      | GPR183    | MTUS2     | UNC80     | IL6       | KIF23     | NEUROD2    |
| TREM1     | SCG2      | TMEM144   | GFAP      | RGS10     | USP9Y     | NRXN3     | EDN3      | BRIP1     | TMSB10     |
| LUZP2     | SENP8     | ABCA8     | PRODH     | C1QA      | CALN1     | SCN2A     | ITGA1     | UHRF1     | ADRA2A     |
| GAB3      | SOX2-OT   | HHIP      | SLC4A4    | LCP1      | LOC653653 | SNAP25    | ICAM1     | CLSPN     | SRGAP1     |

**Table S4.** List of enriched genes in each neuronal community.

| Gene name | Enriched community | Correlation coefficient | Wilcoxon p.value |
|-----------|--------------------|-------------------------|------------------|
| CMKLR1    | 1                  | 0.49                    | 2.65E-03         |
| COL16A1   | 1                  | 0.50                    | 4.36E-02         |
| EYA1      | 1                  | 0.39                    | 1.01E-02         |
| PAX6      | 1                  | 0.48                    | 1.24E-02         |
| B2M       | 2                  | 0.48                    | 8.84E-03         |
| CPLX3     | 3                  | 0.61                    | 9.14E-03         |
| FCRL4     | 3                  | 0.43                    | 3.03E-02         |
| FSCN3     | 3                  | 0.52                    | 2.22E-02         |
| KANK2     | 3                  | 0.58                    | 2.32E-03         |
| LAMP5     | 3                  | 0.58                    | 8.35E-03         |
| LOC641364 | 3                  | 0.46                    | 1.42E-04         |
| NMBR      | 3                  | 0.47                    | 2.50E-04         |
| PIP5K1B   | 3                  | 0.58                    | 4.63E-03         |
| PROK2     | 3                  | 0.55                    | 2.20E-02         |
| SPARC     | 3                  | 0.46                    | 1.20E-03         |
| SV2C      | 3                  | 0.53                    | 1.01E-04         |
| ANO3      | 4                  | 0.49                    | 4.46E-02         |
| C1orf115  | 4                  | 0.50                    | 2.02E-03         |
| CHN1      | 4                  | 0.62                    | 2.90E-06         |
| CPNE4     | 4                  | 0.46                    | 3.60E-03         |
| FOXP2     | 4                  | 0.38                    | 3.58E-02         |
| HTR2A     | 4                  | 0.55                    | 2.59E-02         |
| IPCEF1    | 4                  | 0.55                    | 3.15E-03         |
| KCNMB4    | 4                  | 0.47                    | 3.83E-02         |
| KCNV1     | 4                  | 0.50                    | 1.64E-04         |
| KHDRBS3   | 4                  | 0.47                    | 1.75E-02         |
| LMO4      | 4                  | 0.52                    | 3.75E-03         |
| LRMP      | 4                  | 0.51                    | 1.82E-03         |
| NEUROD6   | 4                  | 0.64                    | 1.43E-07         |
| NPTX1     | 4                  | 0.54                    | 2.80E-02         |
| PDE1A     | 4                  | 0.60                    | 3.15E-05         |
| PRDM8     | 4                  | 0.46                    | 2.62E-02         |
| PTPRK     | 4                  | 0.43                    | 1.23E-02         |
| RASL10A   | 4                  | 0.39                    | 2.74E-02         |
| RYR2      | 4                  | 0.43                    | 4.10E-02         |
| SATB2     | 4                  | 0.49                    | 1.18E-04         |
| SLC17A7   | 4                  | 0.65                    | 2.11E-06         |
| SV2B      | 4                  | 0.47                    | 3.05E-02         |
| XYLT1     | 4                  | 0.40                    | 1.86E-02         |
| C8orf4    | 5                  | 0.71                    | 7.35E-08         |
| CRHBP     | 5                  | 0.53                    | 4.86E-02         |

|           |   |      |          |
|-----------|---|------|----------|
| FCRLB     | 5 | 0.55 | 1.98E-02 |
| HGF       | 5 | 0.43 | 2.05E-02 |
| KIAA0226L | 5 | 0.65 | 4.00E-06 |
| LHX6      | 5 | 0.53 | 1.58E-02 |
| PVALB     | 5 | 0.48 | 4.37E-02 |
| RGS5      | 5 | 0.56 | 5.16E-03 |
| SNCG      | 5 | 0.57 | 3.02E-03 |
| SPARCL1   | 5 | 0.41 | 4.43E-02 |
| ST8SIA4   | 5 | 0.60 | 7.93E-04 |
| TAC1      | 5 | 0.60 | 4.99E-03 |
| TMEM132C  | 5 | 0.59 | 4.83E-03 |
| VAX1      | 5 | 0.56 | 1.72E-02 |
| WNT16     | 5 | 0.60 | 8.42E-04 |
| COL11A1   | 6 | 0.49 | 2.48E-03 |
| CPNE2     | 6 | 0.50 | 2.35E-03 |
| CTTNBP2   | 6 | 0.46 | 3.17E-02 |
| GAL3ST1   | 6 | 0.32 | 4.25E-02 |
| IQGAP2    | 6 | 0.46 | 3.57E-03 |
| SLC22A3   | 6 | 0.44 | 8.38E-03 |
| SVEP1     | 6 | 0.57 | 1.12E-04 |
| TAC3      | 6 | 0.47 | 4.12E-03 |
| VIP       | 6 | 0.62 | 4.50E-06 |
| VWDE      | 6 | 0.36 | 2.92E-02 |
| AGPAT9    | 7 | 0.37 | 4.54E-02 |
| C4BPA     | 7 | 0.59 | 2.66E-03 |
| GLYCTK    | 7 | 0.24 | 4.53E-03 |
| RBP2      | 7 | 0.43 | 3.80E-03 |
| RRP7B     | 7 | 0.48 | 1.26E-04 |
| SAP25     | 7 | 0.51 | 4.15E-04 |
| SOLH      | 7 | 0.55 | 3.18E-03 |
| TMCO4     | 7 | 0.30 | 6.42E-03 |
| TRIM34    | 7 | 0.48 | 4.15E-04 |

**Table S5.** Genes significantly associated with the first 3 principal components after performing PCA on fetal and adult neurons.

| Gene name | Correlation coefficient | Significance | Associated dimension |
|-----------|-------------------------|--------------|----------------------|
| THY1      | 0.778224397             | 1.29E-51     | 1                    |
| PKM2      | 0.755621701             | 4.20E-47     | 1                    |
| B3GNT1    | 0.748158058             | 1.02E-45     | 1                    |
| GABRA1    | 0.744492285             | 4.66E-45     | 1                    |
| VSNL1     | 0.739509296             | 3.55E-44     | 1                    |
| PRNP      | 0.738320906             | 5.73E-44     | 1                    |
| NSF       | 0.736332525             | 1.27E-43     | 1                    |
| SNX10     | 0.736107688             | 1.38E-43     | 1                    |
| TUBA4A    | 0.73518509              | 1.99E-43     | 1                    |
| GOT1      | 0.733447761             | 3.95E-43     | 1                    |
| ZNF483    | 0.727415404             | 4.07E-42     | 1                    |
| TMEM130   | 0.7261627               | 6.55E-42     | 1                    |
| GABRG2    | 0.725179692             | 9.50E-42     | 1                    |
| NAP1L5    | 0.720058232             | 6.43E-41     | 1                    |
| SELM      | 0.717738393             | 1.51E-40     | 1                    |
| TSPYL2    | 0.717526948             | 1.63E-40     | 1                    |
| CLU       | 0.713849708             | 6.17E-40     | 1                    |
| GUCY1B3   | 0.709172634             | 3.26E-39     | 1                    |
| TSPAN7    | 0.707965111             | 4.99E-39     | 1                    |
| RAB3A     | 0.705531357             | 1.16E-38     | 1                    |
| ALDOA     | 0.702864229             | 2.92E-38     | 1                    |
| ATP6AP2   | 0.699371078             | 9.61E-38     | 1                    |
| PPM1H     | 0.693647476             | 6.51E-37     | 1                    |
| GABRB2    | 0.691612719             | 1.27E-36     | 1                    |
| SNAP25    | 0.690805856             | 1.65E-36     | 1                    |
| RCAN2     | 0.690763818             | 1.68E-36     | 1                    |
| CAMK2A    | 0.690257879             | 1.98E-36     | 1                    |
| PNMA2     | 0.689864122             | 2.25E-36     | 1                    |
| PNMAL1    | 0.687543725             | 4.77E-36     | 1                    |
| ATP6V1H   | 0.687516645             | 4.81E-36     | 1                    |
| FAIM2     | 0.686211493             | 7.31E-36     | 1                    |
| DNAJC6    | 0.686149031             | 7.46E-36     | 1                    |
| PARM1     | 0.683597645             | 1.68E-35     | 1                    |
| ATP6V1A   | 0.680036557             | 5.16E-35     | 1                    |
| ALDOC     | 0.679355637             | 6.39E-35     | 1                    |
| NRSN2     | 0.678375826             | 8.67E-35     | 1                    |
| SPOCK2    | 0.674562721             | 2.81E-34     | 1                    |
| MDH1      | 0.673548182             | 3.83E-34     | 1                    |
| SLC25A4   | 0.672498631             | 5.27E-34     | 1                    |
| REEP5     | 0.670489892             | 9.66E-34     | 1                    |

|          |             |          |   |
|----------|-------------|----------|---|
| SCOC     | 0.670267386 | 1.03E-33 | 1 |
| SPRYD3   | 0.669006616 | 1.51E-33 | 1 |
| CNTNAP2  | 0.668513979 | 1.75E-33 | 1 |
| ARL6IP5  | 0.667556754 | 2.33E-33 | 1 |
| BEX4     | 0.667361757 | 2.46E-33 | 1 |
| CHGB     | 0.66692178  | 2.81E-33 | 1 |
| PEBP1    | 0.665868891 | 3.84E-33 | 1 |
| CNTN1    | 0.66365622  | 7.36E-33 | 1 |
| GAS7     | 0.663390745 | 7.96E-33 | 1 |
| SERPINI1 | 0.662868971 | 9.27E-33 | 1 |
| CRYAB    | 0.662062628 | 1.17E-32 | 1 |
| CTSB     | 0.661881148 | 1.24E-32 | 1 |
| ATPIF1   | 0.661421619 | 1.41E-32 | 1 |
| LDHA     | 0.660018672 | 2.12E-32 | 1 |
| MAP1A    | 0.659487975 | 2.48E-32 | 1 |
| LSAMP    | 0.658070647 | 3.72E-32 | 1 |
| RAB6B    | 0.657982646 | 3.82E-32 | 1 |
| PREPL    | 0.657191351 | 4.79E-32 | 1 |
| PIN1     | 0.656641746 | 5.60E-32 | 1 |
| PSAP     | 0.656095435 | 6.55E-32 | 1 |
| ATP1B1   | 0.654985027 | 8.98E-32 | 1 |
| SLC22A17 | 0.654814383 | 9.42E-32 | 1 |
| ATP6V1B2 | 0.654305243 | 1.09E-31 | 1 |
| NAP1L3   | 0.654162264 | 1.13E-31 | 1 |
| RHBDD2   | 0.65306619  | 1.54E-31 | 1 |
| CELF4    | 0.652841577 | 1.65E-31 | 1 |
| ENO2     | 0.651955306 | 2.11E-31 | 1 |
| GABBR2   | 0.651841778 | 2.18E-31 | 1 |
| GABRA4   | 0.650733019 | 2.97E-31 | 1 |
| TCEAL6   | 0.650630975 | 3.06E-31 | 1 |
| FABP3    | 0.650492983 | 3.18E-31 | 1 |
| ABAT     | 0.650237171 | 3.41E-31 | 1 |
| OXR1     | 0.649515306 | 4.17E-31 | 1 |
| LGI1     | 0.647809412 | 6.69E-31 | 1 |
| DYNLT3   | 0.647613739 | 7.06E-31 | 1 |
| SYT17    | 0.647086071 | 8.17E-31 | 1 |
| SYT1     | 0.646370964 | 9.94E-31 | 1 |
| NPTN     | 0.645949049 | 1.12E-30 | 1 |
| NDRG4    | 0.645221001 | 1.36E-30 | 1 |
| DKK3     | 0.644192998 | 1.80E-30 | 1 |
| ATP6V1D  | 0.643266033 | 2.32E-30 | 1 |
| NCDN     | 0.642586347 | 2.79E-30 | 1 |
| SCG2     | 0.642031395 | 3.24E-30 | 1 |
| NAPB     | 0.641569581 | 3.67E-30 | 1 |
| SCN2B    | 0.638985763 | 7.35E-30 | 1 |



|           |             |          |   |
|-----------|-------------|----------|---|
| STEAP2    | 0.638535053 | 8.29E-30 | 1 |
| ZCCHC12   | 0.637599596 | 1.06E-29 | 1 |
| SCG5      | 0.636282368 | 1.51E-29 | 1 |
| TMEM205   | 0.635581812 | 1.81E-29 | 1 |
| OAT       | 0.635338688 | 1.93E-29 | 1 |
| SAMD12    | 0.634422685 | 2.46E-29 | 1 |
| SCN2A     | 0.634174862 | 2.63E-29 | 1 |
| C2orf74   | 0.633803344 | 2.90E-29 | 1 |
| SYNPR     | 0.633374053 | 3.24E-29 | 1 |
| TCEAL5    | 0.630433008 | 6.97E-29 | 1 |
| SOD1      | 0.630367965 | 7.09E-29 | 1 |
| BRP44     | 0.628860883 | 1.05E-28 | 1 |
| PEG3      | 0.627648426 | 1.43E-28 | 1 |
| NRIP3     | 0.626593828 | 1.87E-28 | 1 |
| BEX2      | 0.625621049 | 2.40E-28 | 1 |
| PGK1      | 0.625338434 | 2.58E-28 | 1 |
| SYN1      | 0.624434789 | 3.24E-28 | 1 |
| USP11     | 0.623993673 | 3.62E-28 | 1 |
| MAP7D2    | 0.623055529 | 4.59E-28 | 1 |
| OSBPL1A   | 0.622558429 | 5.20E-28 | 1 |
| ATP1A1    | 0.622156391 | 5.76E-28 | 1 |
| PNPO      | 0.6208364   | 8.01E-28 | 1 |
| HPCAL4    | 0.61911191  | 1.23E-27 | 1 |
| BAG4      | 0.617645935 | 1.77E-27 | 1 |
| ARF3      | 0.617016105 | 2.07E-27 | 1 |
| GABARAPL1 | 0.615745351 | 2.83E-27 | 1 |
| SNRPN     | 0.614749599 | 3.61E-27 | 1 |
| ANXA7     | 0.613547312 | 4.85E-27 | 1 |
| TCEAL7    | 0.613443435 | 4.97E-27 | 1 |
| PHYHIPL   | 0.612418792 | 6.38E-27 | 1 |
| MEG3      | 0.611834528 | 7.35E-27 | 1 |
| PAR-SN    | 0.611754203 | 7.49E-27 | 1 |
| FGF12     | 0.611604602 | 7.77E-27 | 1 |
| ACYP2     | 0.610586619 | 9.93E-27 | 1 |
| TMEM59L   | 0.610486954 | 1.02E-26 | 1 |
| SLC2A13   | 0.610111369 | 1.11E-26 | 1 |
| ATP1B2    | 0.60970864  | 1.23E-26 | 1 |
| QDPR      | 0.609339605 | 1.34E-26 | 1 |
| CDS2      | 0.609151443 | 1.40E-26 | 1 |
| PLEKHB2   | 0.608950827 | 1.47E-26 | 1 |
| TMEM66    | 0.606047929 | 2.94E-26 | 1 |
| ATP6V1E1  | 0.606001045 | 2.97E-26 | 1 |
| GPR155    | 0.605679178 | 3.21E-26 | 1 |
| TCEAL3    | 0.604839655 | 3.91E-26 | 1 |
| ZNF385D   | 0.604277379 | 4.47E-26 | 1 |

|          |             |          |   |
|----------|-------------|----------|---|
| MOAP1    | 0.60381499  | 4.98E-26 | 1 |
| PCSK2    | 0.602867375 | 6.23E-26 | 1 |
| UNC80    | 0.602103604 | 7.45E-26 | 1 |
| VAMP2    | 0.601808206 | 7.98E-26 | 1 |
| ITM2B    | 0.601707929 | 8.17E-26 | 1 |
| SPOCK3   | 0.601214063 | 9.17E-26 | 1 |
| ERLEC1   | 0.601143791 | 9.32E-26 | 1 |
| NTRK2    | 0.601049146 | 9.53E-26 | 1 |
| CAMK2B   | 0.600847635 | 9.98E-26 | 1 |
| ATP6V0B  | 0.600754325 | 1.02E-25 | 1 |
| PSMC5    | 0.600428034 | 1.10E-25 | 1 |
| ATP6V0A1 | 0.600097828 | 1.19E-25 | 1 |
| SYN2     | 0.599847987 | 1.26E-25 | 1 |
| ENTPD3   | 0.59961702  | 1.33E-25 | 1 |
| GHITM    | 0.59891295  | 1.56E-25 | 1 |
| CLSTN1   | 0.598400639 | 1.76E-25 | 1 |
| RAB2A    | 0.598164891 | 1.86E-25 | 1 |
| NDFIP1   | 0.598006698 | 1.93E-25 | 1 |
| ST8SIA3  | 0.59720195  | 2.32E-25 | 1 |
| SPINT2   | 0.597151428 | 2.35E-25 | 1 |
| DNAJB14  | 0.596888623 | 2.50E-25 | 1 |
| TPI1     | 0.596776157 | 2.56E-25 | 1 |
| SLC12A5  | 0.59664997  | 2.64E-25 | 1 |
| NDUFA1   | 0.595831976 | 3.18E-25 | 1 |
| SERINC1  | 0.59552345  | 3.41E-25 | 1 |
| CD99L2   | 0.595017789 | 3.83E-25 | 1 |
| ENO1     | 0.594835102 | 3.99E-25 | 1 |
| PTPRN    | 0.594531    | 4.28E-25 | 1 |
| DNM1     | 0.594516816 | 4.29E-25 | 1 |
| CLTC     | 0.594419753 | 4.39E-25 | 1 |
| GSTM3    | 0.594180886 | 4.63E-25 | 1 |
| ARID5B   | 0.59388801  | 4.95E-25 | 1 |
| NHP2L1   | 0.593869065 | 4.97E-25 | 1 |
| OXCT1    | 0.59377681  | 5.08E-25 | 1 |
| ATP6V1F  | 0.593186733 | 5.81E-25 | 1 |
| DNAJC12  | 0.593085285 | 5.94E-25 | 1 |
| C6orf1   | 0.593078398 | 5.95E-25 | 1 |
| SNCA     | 0.592975097 | 6.09E-25 | 1 |
| KCNMA1   | 0.59276635  | 6.39E-25 | 1 |
| SLC7A14  | 0.592591855 | 6.65E-25 | 1 |
| SLC6A17  | 0.592228111 | 7.22E-25 | 1 |
| NCOA7    | 0.592123963 | 7.39E-25 | 1 |
| LRPAP1   | 0.592079136 | 7.46E-25 | 1 |
| CHD5     | 0.591564804 | 8.38E-25 | 1 |
| HAGH     | 0.591512039 | 8.48E-25 | 1 |

|          |             |          |   |
|----------|-------------|----------|---|
| PCBD1    | 0.591317533 | 8.86E-25 | 1 |
| AP2M1    | 0.591265604 | 8.97E-25 | 1 |
| VSTM2A   | 0.5912373   | 9.02E-25 | 1 |
| PCYOX1   | 0.590707925 | 1.02E-24 | 1 |
| NDUFA4   | 0.590426966 | 1.08E-24 | 1 |
| TSR2     | 0.59042519  | 1.08E-24 | 1 |
| MAST4    | 0.590003723 | 1.19E-24 | 1 |
| PPT1     | 0.589977478 | 1.20E-24 | 1 |
| FGF14    | 0.589509619 | 1.33E-24 | 1 |
| CCK      | 0.589051176 | 1.47E-24 | 1 |
| SIPA1L1  | 0.588984039 | 1.50E-24 | 1 |
| ATP5G3   | 0.588676661 | 1.60E-24 | 1 |
| HPRT1    | 0.588324836 | 1.73E-24 | 1 |
| EFR3A    | 0.587518726 | 2.07E-24 | 1 |
| ATP6V1C1 | 0.587210251 | 2.22E-24 | 1 |
| CALM3    | 0.586998676 | 2.33E-24 | 1 |
| ABCA5    | 0.58546576  | 3.27E-24 | 1 |
| SV2A     | 0.585393614 | 3.32E-24 | 1 |
| NDUFA13  | 0.584416456 | 4.12E-24 | 1 |
| LSMD1    | 0.583688302 | 4.83E-24 | 1 |
| COX7A2L  | 0.583315173 | 5.25E-24 | 1 |
| TMEM14A  | 0.583140797 | 5.45E-24 | 1 |
| NDRG3    | 0.582340074 | 6.50E-24 | 1 |
| MAGEE1   | 0.582120353 | 6.81E-24 | 1 |
| IFIT1    | 0.581808419 | 7.29E-24 | 1 |
| IGF1     | 0.581261929 | 8.22E-24 | 1 |
| GABRB1   | 0.58080869  | 9.07E-24 | 1 |
| CD59     | 0.580562403 | 9.57E-24 | 1 |
| NSFP1    | 0.579935999 | 1.10E-23 | 1 |
| FAM162A  | 0.579750416 | 1.14E-23 | 1 |
| CISD1    | 0.579726733 | 1.15E-23 | 1 |
| TRIM37   | 0.579500091 | 1.20E-23 | 1 |
| ATP5G1   | 0.57923624  | 1.27E-23 | 1 |
| SERINC3  | 0.578824885 | 1.39E-23 | 1 |
| NCEH1    | 0.578687264 | 1.44E-23 | 1 |
| GNG3     | 0.577880702 | 1.71E-23 | 1 |
| SULT4A1  | 0.577834995 | 1.72E-23 | 1 |
| OPCML    | 0.577738614 | 1.76E-23 | 1 |
| GPX1     | 0.577683271 | 1.78E-23 | 1 |
| CADM2    | 0.577383471 | 1.90E-23 | 1 |
| GPI      | 0.577356947 | 1.91E-23 | 1 |
| NIPAL3   | 0.57697439  | 2.07E-23 | 1 |
| ATP2B2   | 0.576972569 | 2.08E-23 | 1 |
| PGAM1    | 0.576518506 | 2.29E-23 | 1 |
| ATP6V0D1 | 0.576493589 | 2.30E-23 | 1 |

|              |             |          |   |
|--------------|-------------|----------|---|
| TMEM9        | 0.576322857 | 2.39E-23 | 1 |
| CAMK2N1      | 0.575628767 | 2.77E-23 | 1 |
| AHI1         | 0.575289235 | 2.97E-23 | 1 |
| PAIP2        | 0.57503296  | 3.14E-23 | 1 |
| CREG2        | 0.574904316 | 3.23E-23 | 1 |
| DNAJC19      | 0.574712888 | 3.36E-23 | 1 |
| SEZ6L2       | 0.574491002 | 3.53E-23 | 1 |
| PRKACB       | 0.574336455 | 3.64E-23 | 1 |
| AMPH         | 0.573434467 | 4.41E-23 | 1 |
| SAP18        | 0.573079257 | 4.76E-23 | 1 |
| MINOS1       | 0.573004044 | 4.83E-23 | 1 |
| PGRMC1       | 0.572496486 | 5.38E-23 | 1 |
| KLC1         | 0.572246874 | 5.67E-23 | 1 |
| NDUFB5       | 0.571799228 | 6.23E-23 | 1 |
| RASGRF1      | 0.57179538  | 6.24E-23 | 1 |
| BNIP3        | 0.571504537 | 6.63E-23 | 1 |
| SPOCK1       | 0.571481212 | 6.67E-23 | 1 |
| EDF1         | 0.570963518 | 7.43E-23 | 1 |
| GPRASP1      | 0.569940868 | 9.21E-23 | 1 |
| GPX4         | 0.569274972 | 1.06E-22 | 1 |
| NALCN        | 0.569008438 | 1.12E-22 | 1 |
| EPB41L1      | 0.568675602 | 1.20E-22 | 1 |
| KIAA1217     | 0.568630406 | 1.21E-22 | 1 |
| GRIN2A       | 0.568062665 | 1.36E-22 | 1 |
| TAGLN3       | 0.567708037 | 1.47E-22 | 1 |
| ATP6VOC      | 0.567570579 | 1.51E-22 | 1 |
| LOC100505576 | 0.567451118 | 1.55E-22 | 1 |
| ARNT2        | 0.567345053 | 1.58E-22 | 1 |
| PTPLAD1      | 0.566974932 | 1.71E-22 | 1 |
| BCAP31       | 0.566542941 | 1.87E-22 | 1 |
| YWHAB        | 0.566311249 | 1.96E-22 | 1 |
| PDXK         | 0.565938794 | 2.12E-22 | 1 |
| PAR5         | 0.565779536 | 2.19E-22 | 1 |
| AK5          | 0.565290063 | 2.42E-22 | 1 |
| FBXL16       | 0.565091163 | 2.52E-22 | 1 |
| GOT2         | 0.564782103 | 2.69E-22 | 1 |
| VDAC1        | 0.564735354 | 2.71E-22 | 1 |
| TCEAL2       | 0.564033049 | 3.13E-22 | 1 |
| CPNE6        | 0.563802148 | 3.29E-22 | 1 |
| BCAT1        | 0.563660582 | 3.38E-22 | 1 |
| CHRM1        | 0.563551714 | 3.46E-22 | 1 |
| WBP2         | 0.563512983 | 3.49E-22 | 1 |
| PCGF5        | 0.563442846 | 3.54E-22 | 1 |
| KIF1A        | 0.562731827 | 4.09E-22 | 1 |
| SCAMP5       | 0.5625235   | 4.27E-22 | 1 |

|           |             |          |   |
|-----------|-------------|----------|---|
| PSMA5     | 0.561862003 | 4.89E-22 | 1 |
| NR3C1     | 0.561598593 | 5.15E-22 | 1 |
| TERF2IP   | 0.561403417 | 5.36E-22 | 1 |
| NRXN3     | 0.560865304 | 5.98E-22 | 1 |
| OLFM1     | 0.560154814 | 6.91E-22 | 1 |
| ARL8B     | 0.560089522 | 7.00E-22 | 1 |
| BHLHE41   | 0.559737717 | 7.52E-22 | 1 |
| PCDH10    | 0.559571001 | 7.78E-22 | 1 |
| SCAMP1    | 0.558488606 | 9.67E-22 | 1 |
| MOCS2     | 0.558386056 | 9.88E-22 | 1 |
| PRKAR1A   | 0.558313799 | 1.00E-21 | 1 |
| COX5B     | 0.558298053 | 1.01E-21 | 1 |
| OCIAD1    | 0.557996843 | 1.07E-21 | 1 |
| AARS      | 0.557820302 | 1.11E-21 | 1 |
| COPG2     | 0.557464558 | 1.19E-21 | 1 |
| NECAP1    | 0.557378247 | 1.21E-21 | 1 |
| LOC147670 | 0.556859977 | 1.34E-21 | 1 |
| SRPK2     | 0.556767272 | 1.37E-21 | 1 |
| TARBP1    | 0.556441426 | 1.46E-21 | 1 |
| SEPW1     | 0.556196436 | 1.53E-21 | 1 |
| EPB49     | 0.556143178 | 1.55E-21 | 1 |
| PURA      | 0.555982986 | 1.60E-21 | 1 |
| TECR      | 0.555873445 | 1.63E-21 | 1 |
| PRICKLE2  | 0.555180778 | 1.88E-21 | 1 |
| BEX5      | 0.554871382 | 2.00E-21 | 1 |
| TCEAL4    | 0.554642206 | 2.09E-21 | 1 |
| APLP2     | 0.554192466 | 2.28E-21 | 1 |
| MTCH1     | 0.553077586 | 2.85E-21 | 1 |
| ATP6AP1   | 0.551704887 | 3.74E-21 | 1 |
| APOL2     | 0.551267963 | 4.07E-21 | 1 |
| KIAA1467  | 0.550275848 | 4.95E-21 | 1 |
| HIGD1A    | 0.549800747 | 5.43E-21 | 1 |
| WASF3     | 0.549614011 | 5.63E-21 | 1 |
| NDUFB3    | 0.549365078 | 5.91E-21 | 1 |
| NEGR1     | 0.549181879 | 6.13E-21 | 1 |
| STAT1     | 0.54905676  | 6.28E-21 | 1 |
| COX4I1    | 0.548826866 | 6.56E-21 | 1 |
| KCNC2     | 0.548816965 | 6.58E-21 | 1 |
| PDHB      | 0.548784425 | 6.62E-21 | 1 |
| SLITRK4   | 0.548783031 | 6.62E-21 | 1 |
| GLS       | 0.548377066 | 7.17E-21 | 1 |
| NDUFA2    | 0.547944348 | 7.79E-21 | 1 |
| SYNGR3    | 0.547694599 | 8.18E-21 | 1 |
| CD200     | 0.547516582 | 8.47E-21 | 1 |
| IDS       | 0.547452497 | 8.58E-21 | 1 |

|           |             |          |   |
|-----------|-------------|----------|---|
| UCHL1     | 0.547265539 | 8.89E-21 | 1 |
| STXBP1    | 0.54653538  | 1.02E-20 | 1 |
| ISCU      | 0.546297756 | 1.07E-20 | 1 |
| HLF       | 0.545749522 | 1.19E-20 | 1 |
| CLCN4     | 0.545375462 | 1.28E-20 | 1 |
| NEBL      | 0.5451972   | 1.33E-20 | 1 |
| TMOD2     | 0.545022567 | 1.37E-20 | 1 |
| LOC285878 | 0.544843782 | 1.42E-20 | 1 |
| CDK5      | 0.544409637 | 1.54E-20 | 1 |
| DNM3      | 0.544167825 | 1.62E-20 | 1 |
| ATP2B3    | 0.54359657  | 1.80E-20 | 1 |
| FKBP2     | 0.543280345 | 1.92E-20 | 1 |
| CD47      | 0.54320716  | 1.94E-20 | 1 |
| ITM2C     | 0.543112616 | 1.98E-20 | 1 |
| NDUFV1    | 0.543064265 | 2.00E-20 | 1 |
| NRCAM     | 0.542955832 | 2.04E-20 | 1 |
| RTN3      | 0.542905375 | 2.06E-20 | 1 |
| ATP6V0E2  | 0.5427601   | 2.12E-20 | 1 |
| PFKM      | 0.5425974   | 2.18E-20 | 1 |
| C14orf2   | 0.542588311 | 2.19E-20 | 1 |
| GLRB      | 0.542274969 | 2.32E-20 | 1 |
| STXBP5L   | 0.542181604 | 2.36E-20 | 1 |
| RAB3C     | 0.541976127 | 2.46E-20 | 1 |
| CNNM1     | 0.541410529 | 2.74E-20 | 1 |
| FRMPD4    | 0.541339528 | 2.78E-20 | 1 |
| C10orf32  | 0.54111674  | 2.90E-20 | 1 |
| CANX      | 0.540935632 | 3.00E-20 | 1 |
| BLCAP     | 0.540817453 | 3.07E-20 | 1 |
| NDUFB6    | 0.540455252 | 3.28E-20 | 1 |
| SNAP91    | 0.538927662 | 4.38E-20 | 1 |
| CNTNAP4   | 0.538689127 | 4.58E-20 | 1 |
| MPV17     | 0.538516169 | 4.74E-20 | 1 |
| MEA1      | 0.538156107 | 5.07E-20 | 1 |
| REPS2     | 0.53807503  | 5.15E-20 | 1 |
| ANKS1B    | 0.538033155 | 5.19E-20 | 1 |
| CALB2     | 0.538020142 | 5.20E-20 | 1 |
| AP3M2     | 0.537858463 | 5.36E-20 | 1 |
| FAM65B    | 0.537699689 | 5.52E-20 | 1 |
| GDA       | 0.537687968 | 5.53E-20 | 1 |
| LGMN      | 0.537530248 | 5.70E-20 | 1 |
| RIMS2     | 0.53750547  | 5.73E-20 | 1 |
| KCNB1     | 0.536874897 | 6.45E-20 | 1 |
| SUMO3     | 0.536434865 | 7.00E-20 | 1 |
| MGST3     | 0.536330673 | 7.14E-20 | 1 |
| ARF5      | 0.536325445 | 7.15E-20 | 1 |

|           |             |          |   |
|-----------|-------------|----------|---|
| TCF25     | 0.536062016 | 7.51E-20 | 1 |
| PPP2CA    | 0.535653428 | 8.10E-20 | 1 |
| SQSTM1    | 0.53544877  | 8.42E-20 | 1 |
| HOOK1     | 0.535150342 | 8.90E-20 | 1 |
| CALM1     | 0.534930631 | 9.27E-20 | 1 |
| CIT       | 0.534911514 | 9.30E-20 | 1 |
| NDUFS7    | 0.534859034 | 9.39E-20 | 1 |
| IFI6      | 0.534772136 | 9.55E-20 | 1 |
| C16orf45  | 0.534762371 | 9.56E-20 | 1 |
| MRFAP1    | 0.534517798 | 1.00E-19 | 1 |
| PRRT2     | 0.534473625 | 1.01E-19 | 1 |
| BSG       | 0.534238046 | 1.05E-19 | 1 |
| GABARAPL2 | 0.534094637 | 1.08E-19 | 1 |
| NCAM2     | 0.534063954 | 1.09E-19 | 1 |
| SLC7A8    | 0.533962328 | 1.11E-19 | 1 |
| ATP5B     | 0.533879458 | 1.13E-19 | 1 |
| AKAP6     | 0.533832523 | 1.14E-19 | 1 |
| SUCLG1    | 0.533757319 | 1.15E-19 | 1 |
| RPH3A     | 0.533712566 | 1.16E-19 | 1 |
| TGOLN2    | 0.533516476 | 1.21E-19 | 1 |
| PRKCB     | 0.533423277 | 1.23E-19 | 1 |
| LRRC4C    | 0.532883074 | 1.36E-19 | 1 |
| ACOT7     | 0.532543834 | 1.44E-19 | 1 |
| ZNF204P   | 0.532535912 | 1.45E-19 | 1 |
| RIC3      | 0.532518774 | 1.45E-19 | 1 |
| ZCCHC17   | 0.532175818 | 1.54E-19 | 1 |
| SOD2      | 0.531574646 | 1.73E-19 | 1 |
| PPP2R2C   | 0.531431434 | 1.77E-19 | 1 |
| OAZ1      | 0.531205637 | 1.85E-19 | 1 |
| KRT222    | 0.53115032  | 1.87E-19 | 1 |
| RAD23A    | 0.531069564 | 1.89E-19 | 1 |
| NAP1L2    | 0.531001892 | 1.92E-19 | 1 |
| TIMP2     | 0.530344721 | 2.16E-19 | 1 |
| HMOX2     | 0.530104515 | 2.26E-19 | 1 |
| HMP19     | 0.530013298 | 2.30E-19 | 1 |
| HSPA12A   | 0.529921878 | 2.34E-19 | 1 |
| PRDX5     | 0.529734504 | 2.42E-19 | 1 |
| RBBP7     | 0.52971621  | 2.43E-19 | 1 |
| SYP       | 0.529394341 | 2.57E-19 | 1 |
| EIF4A2    | 0.529376886 | 2.58E-19 | 1 |
| FXYD6     | 0.529126796 | 2.70E-19 | 1 |
| SCN3B     | 0.529025046 | 2.75E-19 | 1 |
| PIK3R1    | 0.528659216 | 2.94E-19 | 1 |
| ISCA1     | 0.528393699 | 3.09E-19 | 1 |
| ARHGEF9   | 0.528327063 | 3.13E-19 | 1 |

|          |             |          |   |
|----------|-------------|----------|---|
| ADRBK2   | 0.528314027 | 3.13E-19 | 1 |
| C19orf53 | 0.528132507 | 3.24E-19 | 1 |
| RABGAP1L | 0.527935667 | 3.36E-19 | 1 |
| MRPL55   | 0.527810132 | 3.44E-19 | 1 |
| FSTL5    | 0.527597857 | 3.57E-19 | 1 |
| CYFIP2   | 0.527462098 | 3.66E-19 | 1 |
| BSCL2    | 0.527272185 | 3.79E-19 | 1 |
| CIRBP    | 0.52699126  | 3.99E-19 | 1 |
| MRPL20   | 0.526875268 | 4.07E-19 | 1 |
| COX14    | 0.526708258 | 4.20E-19 | 1 |
| C1orf173 | 0.526674256 | 4.22E-19 | 1 |
| PRUNE2   | 0.526617638 | 4.27E-19 | 1 |
| NDUFA12  | 0.526499095 | 4.36E-19 | 1 |
| ECH1     | 0.526372078 | 4.46E-19 | 1 |
| LANCL1   | 0.526302249 | 4.52E-19 | 1 |
| PAK1     | 0.526247871 | 4.56E-19 | 1 |
| DGCR6    | 0.526219994 | 4.58E-19 | 1 |
| PJA2     | 0.525335418 | 5.38E-19 | 1 |
| NDUFAB1  | 0.525137325 | 5.57E-19 | 1 |
| MRPS21   | 0.52509541  | 5.62E-19 | 1 |
| YWHAH    | 0.524676867 | 6.06E-19 | 1 |
| O8-sep   | 0.524671031 | 6.06E-19 | 1 |
| SNX3     | 0.524579816 | 6.16E-19 | 1 |
| CMAS     | 0.524455882 | 6.30E-19 | 1 |
| C7orf41  | 0.524138543 | 6.67E-19 | 1 |
| ATCAY    | 0.524014006 | 6.82E-19 | 1 |
| PINK1    | 0.523971269 | 6.87E-19 | 1 |
| EFHA2    | 0.523925891 | 6.93E-19 | 1 |
| ACSL6    | 0.523553784 | 7.41E-19 | 1 |
| SNURF    | 0.523177005 | 7.93E-19 | 1 |
| DDX24    | 0.523137544 | 7.98E-19 | 1 |
| DOCK3    | 0.523096758 | 8.04E-19 | 1 |
| SLC25A12 | 0.522930139 | 8.28E-19 | 1 |
| GPR158   | 0.522473348 | 8.99E-19 | 1 |
| PRR13    | 0.522037919 | 9.72E-19 | 1 |
| HSPA4L   | 0.522020346 | 9.75E-19 | 1 |
| GYG1     | 0.521667588 | 1.04E-18 | 1 |
| NDUFB9   | 0.521542053 | 1.06E-18 | 1 |
| INPP4B   | 0.520865043 | 1.20E-18 | 1 |
| C2orf80  | 0.520374843 | 1.31E-18 | 1 |
| TM2D3    | 0.520235593 | 1.34E-18 | 1 |
| NDUFB8   | 0.520103649 | 1.37E-18 | 1 |
| PDE4A    | 0.520057415 | 1.38E-18 | 1 |
| UQCRB    | 0.51998529  | 1.40E-18 | 1 |
| DIRAS2   | 0.519837311 | 1.44E-18 | 1 |



|           |             |          |   |
|-----------|-------------|----------|---|
| CNBP      | 0.519512213 | 1.52E-18 | 1 |
| BEX1      | 0.519483283 | 1.53E-18 | 1 |
| NDUFS8    | 0.519451295 | 1.54E-18 | 1 |
| TMEM242   | 0.519375676 | 1.56E-18 | 1 |
| CKMT1B    | 0.519372428 | 1.56E-18 | 1 |
| RAB6A     | 0.519285726 | 1.58E-18 | 1 |
| PRKAA2    | 0.519068488 | 1.65E-18 | 1 |
| MYL6B     | 0.519018179 | 1.66E-18 | 1 |
| KIAA0513  | 0.518668252 | 1.77E-18 | 1 |
| MAP1LC3B  | 0.518628477 | 1.78E-18 | 1 |
| PRDX3     | 0.518469204 | 1.83E-18 | 1 |
| TSPYL4    | 0.518361524 | 1.86E-18 | 1 |
| COPS6     | 0.518289445 | 1.89E-18 | 1 |
| SMARCA2   | 0.518273042 | 1.89E-18 | 1 |
| DZIP3     | 0.518260054 | 1.90E-18 | 1 |
| DNAJC5    | 0.517933994 | 2.01E-18 | 1 |
| PCMT1     | 0.517897953 | 2.02E-18 | 1 |
| NAPG      | 0.517853592 | 2.04E-18 | 1 |
| LOC150622 | 0.517783945 | 2.06E-18 | 1 |
| MNF1      | 0.517753798 | 2.08E-18 | 1 |
| MEGF8     | 0.517637963 | 2.12E-18 | 1 |
| TSPYL1    | 0.517579598 | 2.14E-18 | 1 |
| DGKB      | 0.51692356  | 2.40E-18 | 1 |
| CAP2      | 0.516742384 | 2.48E-18 | 1 |
| ADCY2     | 0.51657624  | 2.55E-18 | 1 |
| UQCRC1    | 0.516162364 | 2.74E-18 | 1 |
| LONRF2    | 0.516156444 | 2.75E-18 | 1 |
| SRPRB     | 0.516084032 | 2.78E-18 | 1 |
| SLC41A2   | 0.516068932 | 2.79E-18 | 1 |
| PSMD1     | 0.51601633  | 2.81E-18 | 1 |
| RGS7BP    | 0.515685575 | 2.98E-18 | 1 |
| ZMAT4     | 0.515636448 | 3.01E-18 | 1 |
| ATP2A2    | 0.51507003  | 3.32E-18 | 1 |
| ST3GAL5   | 0.514957849 | 3.39E-18 | 1 |
| RAB18     | 0.514805754 | 3.48E-18 | 1 |
| FAM155A   | 0.514550543 | 3.63E-18 | 1 |
| SLC25A11  | 0.513574889 | 4.31E-18 | 1 |
| SYNJ1     | 0.513567698 | 4.31E-18 | 1 |
| NECAB2    | 0.51345563  | 4.40E-18 | 1 |
| TMEM106B  | 0.513237116 | 4.57E-18 | 1 |
| TUBB4A    | 0.51307899  | 4.69E-18 | 1 |
| COX7A1    | 0.512734518 | 4.98E-18 | 1 |
| ARF1      | 0.512688292 | 5.02E-18 | 1 |
| NEFL      | 0.512606316 | 5.09E-18 | 1 |
| HDAC6     | 0.512512483 | 5.18E-18 | 1 |

|           |             |          |   |
|-----------|-------------|----------|---|
| NFE2L1    | 0.512380844 | 5.30E-18 | 1 |
| ANO5      | 0.511866892 | 5.79E-18 | 1 |
| HSP90AB2P | 0.511671667 | 5.99E-18 | 1 |
| EID1      | 0.511661787 | 6.00E-18 | 1 |
| SPRYD7    | 0.511651734 | 6.01E-18 | 1 |
| ACTR10    | 0.511442929 | 6.23E-18 | 1 |
| PRKCE     | 0.511388687 | 6.28E-18 | 1 |
| LYRM7     | 0.511338961 | 6.34E-18 | 1 |
| NDUFA3    | 0.511246504 | 6.44E-18 | 1 |
| ARL1      | 0.511174861 | 6.52E-18 | 1 |
| NUDCD3    | 0.51106218  | 6.65E-18 | 1 |
| TRMT112   | 0.511042702 | 6.67E-18 | 1 |
| CLCN3     | 0.510967    | 6.76E-18 | 1 |
| NT5DC3    | 0.510963535 | 6.76E-18 | 1 |
| FARSA     | 0.510948856 | 6.78E-18 | 1 |
| ECHS1     | 0.510063594 | 7.89E-18 | 1 |
| DGKE      | 0.50989183  | 8.13E-18 | 1 |
| SLC4A10   | 0.509782151 | 8.28E-18 | 1 |
| ASAH1     | 0.509583699 | 8.57E-18 | 1 |
| ATOX1     | 0.509573165 | 8.58E-18 | 1 |
| DHRS7     | 0.509547563 | 8.62E-18 | 1 |
| FAM216A   | 0.509299296 | 9.00E-18 | 1 |
| APP       | 0.508954219 | 9.54E-18 | 1 |
| RGS4      | 0.508894057 | 9.64E-18 | 1 |
| PER3      | 0.508781288 | 9.83E-18 | 1 |
| NDUFA8    | 0.508476479 | 1.04E-17 | 1 |
| G3BP2     | 0.508229042 | 1.08E-17 | 1 |
| CRBN      | 0.508093603 | 1.11E-17 | 1 |
| PLD3      | 0.507827046 | 1.16E-17 | 1 |
| MAGEH1    | 0.507710219 | 1.18E-17 | 1 |
| PNKD      | 0.507452665 | 1.23E-17 | 1 |
| CASD1     | 0.507240332 | 1.28E-17 | 1 |
| LPIN2     | 0.506898873 | 1.35E-17 | 1 |
| TAX1BP1   | 0.5067912   | 1.38E-17 | 1 |
| TPPP      | 0.506766506 | 1.38E-17 | 1 |
| IGIP      | 0.506758779 | 1.39E-17 | 1 |
| GAPDH     | 0.506706779 | 1.40E-17 | 1 |
| CD63      | 0.506697456 | 1.40E-17 | 1 |
| RAPGEF4   | 0.50657117  | 1.43E-17 | 1 |
| KIF3A     | 0.506465887 | 1.46E-17 | 1 |
| IDH3A     | 0.50625658  | 1.51E-17 | 1 |
| MAP9      | 0.506186805 | 1.53E-17 | 1 |
| NDUFAF3   | 0.506153194 | 1.54E-17 | 1 |
| VDAC3     | 0.506032385 | 1.57E-17 | 1 |
| PHPT1     | 0.505507294 | 1.71E-17 | 1 |

|           |             |          |   |
|-----------|-------------|----------|---|
| ARHGEF12  | 0.505107242 | 1.83E-17 | 1 |
| NRSN1     | 0.504921681 | 1.89E-17 | 1 |
| VAMP1     | 0.504850641 | 1.91E-17 | 1 |
| DYNLL1    | 0.504674253 | 1.97E-17 | 1 |
| PCP4L1    | 0.504520322 | 2.02E-17 | 1 |
| LY6E      | 0.504418271 | 2.06E-17 | 1 |
| PPP1R2    | 0.504238092 | 2.12E-17 | 1 |
| SNCB      | 0.503976016 | 2.22E-17 | 1 |
| MRPS7     | 0.503951542 | 2.23E-17 | 1 |
| SBDS      | 0.503843153 | 2.27E-17 | 1 |
| PDHA1     | 0.503105501 | 2.57E-17 | 1 |
| USP2      | 0.503049204 | 2.59E-17 | 1 |
| TRIM23    | 0.50265268  | 2.77E-17 | 1 |
| RAB3GAP1  | 0.502600182 | 2.79E-17 | 1 |
| SPARCL1   | 0.502505715 | 2.84E-17 | 1 |
| C7orf59   | 0.50234968  | 2.91E-17 | 1 |
| NDUFB1    | 0.502307265 | 2.93E-17 | 1 |
| NDUFC1    | 0.502304388 | 2.94E-17 | 1 |
| CACNB2    | 0.502281386 | 2.95E-17 | 1 |
| NDUFS2    | 0.501949384 | 3.12E-17 | 1 |
| RASD2     | 0.501743288 | 3.22E-17 | 1 |
| MAT2B     | 0.501624471 | 3.29E-17 | 1 |
| ACYP1     | 0.501581989 | 3.31E-17 | 1 |
| LOC647979 | 0.501580807 | 3.31E-17 | 1 |
| EDARADD   | 0.501543891 | 3.33E-17 | 1 |
| CHMP5     | 0.501110852 | 3.58E-17 | 1 |
| PPM1K     | 0.501098618 | 3.59E-17 | 1 |
| DNAJB4    | 0.501088205 | 3.60E-17 | 1 |
| GCC2      | 0.501055072 | 3.62E-17 | 1 |
| ACSL3     | 0.500974521 | 3.67E-17 | 1 |
| SUCLA2    | 0.500674897 | 3.85E-17 | 1 |
| RAP1GDS1  | 0.500497319 | 3.97E-17 | 1 |
| NKIRAS1   | 0.500457554 | 3.99E-17 | 1 |
| RN45S     | 0.500427651 | 4.01E-17 | 1 |
| BRP44L    | 0.500426529 | 4.02E-17 | 1 |
| HSPA5     | 0.500336003 | 4.08E-17 | 1 |
| COPS8     | 0.500203707 | 4.17E-17 | 1 |
| CACNA2D3  | 0.500196538 | 4.17E-17 | 1 |
| CAMK2D    | 0.500148063 | 4.21E-17 | 1 |
| KIAA1244  | 0.50012927  | 4.22E-17 | 1 |
| DBC1      | 0.499938529 | 4.35E-17 | 1 |
| PARK7     | 0.499776835 | 4.47E-17 | 1 |
| GAD1      | 0.49949839  | 4.68E-17 | 1 |
| POLR2I    | 0.498914699 | 5.16E-17 | 1 |
| OMG       | 0.498784214 | 5.27E-17 | 1 |

|           |             |          |   |
|-----------|-------------|----------|---|
| CEND1     | 0.498502253 | 5.52E-17 | 1 |
| EPS15     | 0.498394048 | 5.62E-17 | 1 |
| ANP32E    | 0.498335143 | 5.68E-17 | 1 |
| NDUFA5    | 0.498300849 | 5.71E-17 | 1 |
| ARHGAP26  | 0.498266401 | 5.74E-17 | 1 |
| C1orf212  | 0.498248606 | 5.76E-17 | 1 |
| FBXO44    | 0.498237755 | 5.77E-17 | 1 |
| PSMG3     | 0.497523246 | 6.49E-17 | 1 |
| EPB41L3   | 0.497202891 | 6.84E-17 | 1 |
| ABCC5     | 0.497086334 | 6.97E-17 | 1 |
| ABCF2     | 0.496932411 | 7.15E-17 | 1 |
| THOC7     | 0.49686342  | 7.23E-17 | 1 |
| C11orf31  | 0.496717207 | 7.41E-17 | 1 |
| ENSA      | 0.496713371 | 7.41E-17 | 1 |
| NGFRAP1   | 0.496507167 | 7.67E-17 | 1 |
| WDR61     | 0.496502369 | 7.68E-17 | 1 |
| LRRC8B    | 0.496478154 | 7.71E-17 | 1 |
| SCG3      | 0.496304954 | 7.93E-17 | 1 |
| TRAPPC6B  | 0.496195452 | 8.07E-17 | 1 |
| ABI1      | 0.496174648 | 8.10E-17 | 1 |
| ARL6IP1   | 0.496110716 | 8.18E-17 | 1 |
| FAM126B   | 0.495623649 | 8.86E-17 | 1 |
| RTN1      | 0.495590701 | 8.91E-17 | 1 |
| PLCXD3    | 0.495527917 | 9.00E-17 | 1 |
| KCNAB1    | 0.495447023 | 9.12E-17 | 1 |
| ARHGAP5   | 0.495396213 | 9.20E-17 | 1 |
| GTF2F1    | 0.494935666 | 9.92E-17 | 1 |
| ME1       | 0.494854351 | 1.01E-16 | 1 |
| LOC728730 | 0.494768439 | 1.02E-16 | 1 |
| RNF187    | 0.49461892  | 1.04E-16 | 1 |
| ATP6V1G2  | 0.494186446 | 1.12E-16 | 1 |
| GNAO1     | 0.494161817 | 1.13E-16 | 1 |
| MICU1     | 0.494118676 | 1.13E-16 | 1 |
| CDH9      | 0.494071813 | 1.14E-16 | 1 |
| STMN3     | 0.49397882  | 1.16E-16 | 1 |
| PEG10     | 0.493913977 | 1.17E-16 | 1 |
| CTSF      | 0.493306867 | 1.29E-16 | 1 |
| AIG1      | 0.493081653 | 1.34E-16 | 1 |
| PTPRN2    | 0.493074466 | 1.34E-16 | 1 |
| CYCS      | 0.492765191 | 1.41E-16 | 1 |
| TUBA1B    | 0.492744882 | 1.42E-16 | 1 |
| NPTXR     | 0.49262084  | 1.45E-16 | 1 |
| HSPA9     | 0.492589719 | 1.45E-16 | 1 |
| CCDC136   | 0.492561214 | 1.46E-16 | 1 |
| EPB41L4B  | 0.492552807 | 1.46E-16 | 1 |

|            |             |          |   |
|------------|-------------|----------|---|
| ATP1A3     | 0.492518444 | 1.47E-16 | 1 |
| HSP90AB1   | 0.492308802 | 1.52E-16 | 1 |
| CSGALNACT1 | 0.492169968 | 1.55E-16 | 1 |
| COX8A      | 0.491888231 | 1.63E-16 | 1 |
| CTSD       | 0.491829107 | 1.64E-16 | 1 |
| C9orf125   | 0.491795693 | 1.65E-16 | 1 |
| PPP2R4     | 0.491794631 | 1.65E-16 | 1 |
| TCEAL8     | 0.491617045 | 1.70E-16 | 1 |
| PGM2L1     | 0.491554667 | 1.72E-16 | 1 |
| SARS       | 0.491553071 | 1.72E-16 | 1 |
| GNAI1      | 0.491392505 | 1.76E-16 | 1 |
| PTPRA      | 0.491362995 | 1.77E-16 | 1 |
| CNTN5      | 0.491199782 | 1.82E-16 | 1 |
| ZYG11B     | 0.491179566 | 1.82E-16 | 1 |
| TMEFF2     | 0.49110057  | 1.85E-16 | 1 |
| AKAP11     | 0.490943641 | 1.89E-16 | 1 |
| MRPL33     | 0.490828693 | 1.93E-16 | 1 |
| CAMK1G     | 0.490634651 | 1.99E-16 | 1 |
| PPA1       | 0.490632884 | 1.99E-16 | 1 |
| KIAA1107   | 0.490349493 | 2.09E-16 | 1 |
| PPP1R7     | 0.490040319 | 2.19E-16 | 1 |
| NGRN       | 0.489770563 | 2.29E-16 | 1 |
| FAM171B    | 0.489504993 | 2.39E-16 | 1 |
| SVOP       | 0.489358268 | 2.44E-16 | 1 |
| NCALD      | 0.489337106 | 2.45E-16 | 1 |
| DYNC2LI1   | 0.489265287 | 2.48E-16 | 1 |
| CACNG8     | 0.489148037 | 2.53E-16 | 1 |
| ATP2B1     | 0.489107896 | 2.54E-16 | 1 |
| GLG1       | 0.489026112 | 2.58E-16 | 1 |
| TAOK3      | 0.4888615   | 2.65E-16 | 1 |
| PPP2R1A    | 0.488433653 | 2.83E-16 | 1 |
| SLC25A3    | 0.488091318 | 2.99E-16 | 1 |
| COQ10B     | 0.48788924  | 3.09E-16 | 1 |
| B3GALNT1   | 0.487714179 | 3.18E-16 | 1 |
| LOC653566  | 0.487583313 | 3.25E-16 | 1 |
| PMM1       | 0.487199886 | 3.45E-16 | 1 |
| EIF2AK2    | 0.486800166 | 3.68E-16 | 1 |
| VPS35      | 0.486194634 | 4.05E-16 | 1 |
| RFK        | 0.486134511 | 4.09E-16 | 1 |
| GSTO1      | 0.485560164 | 4.48E-16 | 1 |
| MT3        | 0.485487957 | 4.53E-16 | 1 |
| FBXO3      | 0.485361763 | 4.62E-16 | 1 |
| PITHD1     | 0.485200253 | 4.74E-16 | 1 |
| NDUFA7     | 0.485142601 | 4.78E-16 | 1 |
| CDK14      | 0.485122621 | 4.80E-16 | 1 |

|           |             |          |   |
|-----------|-------------|----------|---|
| TMEM50B   | 0.485005402 | 4.89E-16 | 1 |
| SCRN1     | 0.485000433 | 4.89E-16 | 1 |
| GRM5      | 0.48492706  | 4.95E-16 | 1 |
| DNER      | 0.484857971 | 5.00E-16 | 1 |
| ZDBF2     | 0.484433145 | 5.35E-16 | 1 |
| KCNA6     | 0.484276144 | 5.48E-16 | 1 |
| ZBTB8OS   | 0.484227279 | 5.53E-16 | 1 |
| TUB       | 0.483611723 | 6.09E-16 | 1 |
| BABAM1    | 0.483443647 | 6.25E-16 | 1 |
| MRP63     | 0.483409664 | 6.28E-16 | 1 |
| NEDD8     | 0.483315719 | 6.38E-16 | 1 |
| C16orf5   | 0.483158561 | 6.54E-16 | 1 |
| ProSAPiP1 | 0.483056514 | 6.64E-16 | 1 |
| MKKS      | 0.483028213 | 6.67E-16 | 1 |
| MZT1      | 0.483021708 | 6.68E-16 | 1 |
| ATP5L     | 0.482961115 | 6.74E-16 | 1 |
| DCTN1     | 0.482778559 | 6.94E-16 | 1 |
| MRPL34    | 0.482622964 | 7.11E-16 | 1 |
| UQCRC2    | 0.482403162 | 7.36E-16 | 1 |
| SDHB      | 0.482305875 | 7.47E-16 | 1 |
| KCNJ3     | 0.482257405 | 7.53E-16 | 1 |
| MPPE1     | 0.482109679 | 7.71E-16 | 1 |
| RAB3IP    | 0.482009199 | 7.83E-16 | 1 |
| PPP3CB    | 0.481908926 | 7.95E-16 | 1 |
| SCN1A     | 0.481818673 | 8.06E-16 | 1 |
| CHN1      | 0.481691159 | 8.23E-16 | 1 |
| UBR3      | 0.481645852 | 8.29E-16 | 1 |
| KIFAP3    | 0.481576964 | 8.38E-16 | 1 |
| LMBRD1    | 0.481555696 | 8.40E-16 | 1 |
| PEX19     | 0.481338967 | 8.69E-16 | 1 |
| CPLX2     | 0.481277572 | 8.78E-16 | 1 |
| COPS7A    | 0.481246488 | 8.82E-16 | 1 |
| LPCAT4    | 0.481239752 | 8.83E-16 | 1 |
| RMND5A    | 0.481211536 | 8.87E-16 | 1 |
| COBL      | 0.481177203 | 8.91E-16 | 1 |
| DIP2A     | 0.481142526 | 8.96E-16 | 1 |
| GRIK2     | 0.480811531 | 9.44E-16 | 1 |
| SIRPA     | 0.480574294 | 9.79E-16 | 1 |
| PSMB10    | 0.48025167  | 1.03E-15 | 1 |
| ALDH5A1   | 0.479501422 | 1.16E-15 | 1 |
| MAP7      | 0.479492189 | 1.16E-15 | 1 |
| FARSB     | 0.479351684 | 1.18E-15 | 1 |
| PI4KA     | 0.479299874 | 1.19E-15 | 1 |
| GAD2      | 0.479079997 | 1.24E-15 | 1 |
| SLU7      | 0.47903596  | 1.24E-15 | 1 |

|           |             |          |   |
|-----------|-------------|----------|---|
| DLD       | 0.478845981 | 1.28E-15 | 1 |
| LDHB      | 0.478722846 | 1.31E-15 | 1 |
| RYR2      | 0.478694959 | 1.31E-15 | 1 |
| TBC1D24   | 0.478677325 | 1.31E-15 | 1 |
| DLG1      | 0.478563804 | 1.34E-15 | 1 |
| UROD      | 0.478558799 | 1.34E-15 | 1 |
| USO1      | 0.478174922 | 1.42E-15 | 1 |
| APBB1     | 0.478040134 | 1.45E-15 | 1 |
| TPRG1L    | 0.478038582 | 1.45E-15 | 1 |
| C4orf3    | 0.478020176 | 1.46E-15 | 1 |
| GUCY1A3   | 0.477980744 | 1.46E-15 | 1 |
| PSMD8     | 0.477975661 | 1.47E-15 | 1 |
| SDHA      | 0.477945763 | 1.47E-15 | 1 |
| DDIT3     | 0.477771005 | 1.51E-15 | 1 |
| PPP1R9A   | 0.47762725  | 1.55E-15 | 1 |
| NQO2      | 0.477350976 | 1.61E-15 | 1 |
| COX7C     | 0.477235545 | 1.64E-15 | 1 |
| FKBP3     | 0.47714096  | 1.67E-15 | 1 |
| EDIL3     | 0.477129322 | 1.67E-15 | 1 |
| RNASEK    | 0.477121173 | 1.67E-15 | 1 |
| ATP5H     | 0.47711537  | 1.67E-15 | 1 |
| TMF1      | 0.477033558 | 1.69E-15 | 1 |
| CSRNP3    | 0.476937071 | 1.72E-15 | 1 |
| FAM169A   | 0.47691223  | 1.73E-15 | 1 |
| MADD      | 0.476857167 | 1.74E-15 | 1 |
| DNAJA4    | 0.476787611 | 1.76E-15 | 1 |
| CDKL2     | 0.476734965 | 1.77E-15 | 1 |
| CSMD1     | 0.476667621 | 1.79E-15 | 1 |
| OPRK1     | 0.476573136 | 1.82E-15 | 1 |
| ENDOD1    | 0.476546836 | 1.83E-15 | 1 |
| RFPL1-AS1 | 0.47634302  | 1.88E-15 | 1 |
| C9orf123  | 0.476338287 | 1.89E-15 | 1 |
| DTNA      | 0.475945332 | 2.00E-15 | 1 |
| CAMK2G    | 0.475225217 | 2.24E-15 | 1 |
| UNC13A    | 0.474719964 | 2.42E-15 | 1 |
| KCNK1     | 0.474679579 | 2.43E-15 | 1 |
| AK1       | 0.474504938 | 2.50E-15 | 1 |
| MRAS      | 0.47447993  | 2.51E-15 | 1 |
| MRPL28    | 0.473953022 | 2.72E-15 | 1 |
| HK1       | 0.473839968 | 2.76E-15 | 1 |
| NMNAT2    | 0.473671199 | 2.84E-15 | 1 |
| TIAM1     | 0.473499163 | 2.91E-15 | 1 |
| MPP2      | 0.473149877 | 3.07E-15 | 1 |
| PACSIN1   | 0.473142575 | 3.07E-15 | 1 |
| CLSTN3    | 0.473127361 | 3.08E-15 | 1 |

|          |             |          |   |
|----------|-------------|----------|---|
| PTPRR    | 0.473111808 | 3.09E-15 | 1 |
| GRIPAP1  | 0.473053165 | 3.11E-15 | 1 |
| PDIA3    | 0.473031583 | 3.13E-15 | 1 |
| PTGR1    | 0.472689078 | 3.29E-15 | 1 |
| KCNIP4   | 0.472683337 | 3.29E-15 | 1 |
| ATMIN    | 0.472505369 | 3.38E-15 | 1 |
| ABHD10   | 0.472460411 | 3.41E-15 | 1 |
| PCDH20   | 0.472420177 | 3.43E-15 | 1 |
| LYRM1    | 0.472340407 | 3.47E-15 | 1 |
| SGSM1    | 0.472329872 | 3.48E-15 | 1 |
| C1orf123 | 0.472286616 | 3.50E-15 | 1 |
| LRPPRC   | 0.471799043 | 3.77E-15 | 1 |
| SCN7A    | 0.471663141 | 3.85E-15 | 1 |
| S100A6   | 0.471590651 | 3.89E-15 | 1 |
| ANKH     | 0.471558241 | 3.91E-15 | 1 |
| TMEM55A  | 0.470908194 | 4.31E-15 | 1 |
| RUNDC3A  | 0.470841062 | 4.35E-15 | 1 |
| MAOB     | 0.470498954 | 4.58E-15 | 1 |
| CYP4X1   | 0.470445947 | 4.62E-15 | 1 |
| PLS3     | 0.46975911  | 5.12E-15 | 1 |
| NARS     | 0.469754464 | 5.13E-15 | 1 |
| COX6B1   | 0.469690186 | 5.18E-15 | 1 |
| SGIP1    | 0.469576737 | 5.27E-15 | 1 |
| SCPEP1   | 0.469377932 | 5.43E-15 | 1 |
| OPTN     | 0.46928995  | 5.50E-15 | 1 |
| NDUFS5   | 0.469141197 | 5.62E-15 | 1 |
| ENPP5    | 0.468998015 | 5.75E-15 | 1 |
| ZDHHC21  | 0.468836386 | 5.89E-15 | 1 |
| MDH2     | 0.46874848  | 5.96E-15 | 1 |
| EHBP1    | 0.468703909 | 6.00E-15 | 1 |
| FRY      | 0.468681113 | 6.02E-15 | 1 |
| LRP1B    | 0.468647701 | 6.05E-15 | 1 |
| CACNG2   | 0.468554445 | 6.14E-15 | 1 |
| NAPA     | 0.468138607 | 6.53E-15 | 1 |
| CALCOCO1 | 0.46782439  | 6.85E-15 | 1 |
| BCAP29   | 0.467811594 | 6.86E-15 | 1 |
| CYB561   | 0.467625678 | 7.05E-15 | 1 |
| DSTN     | 0.467434177 | 7.26E-15 | 1 |
| SERPINB9 | 0.467272527 | 7.44E-15 | 1 |
| KLHL13   | 0.467240031 | 7.47E-15 | 1 |
| PPIL4    | 0.466840562 | 7.93E-15 | 1 |
| CDH8     | 0.466461353 | 8.39E-15 | 1 |
| MAP2K4   | 0.4663204   | 8.57E-15 | 1 |
| AP1S2    | 0.465955283 | 9.05E-15 | 1 |
| EHD3     | 0.465910328 | 9.11E-15 | 1 |



|           |             |          |   |
|-----------|-------------|----------|---|
| SRSF5     | 0.46581826  | 9.23E-15 | 1 |
| SYNGR1    | 0.465783426 | 9.28E-15 | 1 |
| ATP5J2    | 0.465763953 | 9.31E-15 | 1 |
| SLC6A1    | 0.465746244 | 9.33E-15 | 1 |
| EEF1A2    | 0.465475654 | 9.71E-15 | 1 |
| TACC1     | 0.465458653 | 9.74E-15 | 1 |
| NDUFB2    | 0.465430295 | 9.78E-15 | 1 |
| AKR1B1    | 0.465238034 | 1.01E-14 | 1 |
| BTBD11    | 0.465228203 | 1.01E-14 | 1 |
| SEC62     | 0.465020797 | 1.04E-14 | 1 |
| ARFGEF2   | 0.464658503 | 1.10E-14 | 1 |
| ARV1      | 0.464634483 | 1.10E-14 | 1 |
| ANAPC13   | 0.464580341 | 1.11E-14 | 1 |
| GNB5      | 0.46447733  | 1.13E-14 | 1 |
| SPOP      | 0.464322329 | 1.15E-14 | 1 |
| ADARB2    | 0.464265794 | 1.16E-14 | 1 |
| CCNH      | 0.464186533 | 1.18E-14 | 1 |
| JTB       | 0.464185743 | 1.18E-14 | 1 |
| ZBTB16    | 0.463997859 | 1.21E-14 | 1 |
| TLK1      | 0.463949259 | 1.22E-14 | 1 |
| ASS1      | 0.463864693 | 1.23E-14 | 1 |
| ZNHIT3    | 0.463814187 | 1.24E-14 | 1 |
| HYOU1     | 0.463732782 | 1.26E-14 | 1 |
| CTSL1     | 0.463706044 | 1.26E-14 | 1 |
| CCDC56    | 0.463522185 | 1.30E-14 | 1 |
| UQCR10    | 0.463463534 | 1.31E-14 | 1 |
| GRPEL1    | 0.463312128 | 1.34E-14 | 1 |
| C9orf5    | 0.463245051 | 1.35E-14 | 1 |
| YPEL5     | 0.463229195 | 1.35E-14 | 1 |
| ZBTB4     | 0.463216613 | 1.36E-14 | 1 |
| UQCRH     | 0.46320749  | 1.36E-14 | 1 |
| SUB1      | 0.463087462 | 1.38E-14 | 1 |
| FIS1      | 0.463055149 | 1.39E-14 | 1 |
| ALCAM     | 0.462699301 | 1.46E-14 | 1 |
| FAM127A   | 0.462611406 | 1.48E-14 | 1 |
| HSP90AB3P | 0.462560813 | 1.49E-14 | 1 |
| PSMB5     | 0.462328347 | 1.55E-14 | 1 |
| TM9SF2    | 0.461596851 | 1.72E-14 | 1 |
| DPP6      | 0.461484069 | 1.75E-14 | 1 |
| SPCS1     | 0.461085399 | 1.85E-14 | 1 |
| JKAMP     | 0.460737795 | 1.95E-14 | 1 |
| KAZN      | 0.46049112  | 2.02E-14 | 1 |
| COX17     | 0.460412325 | 2.05E-14 | 1 |
| SNAPC5    | 0.46009131  | 2.14E-14 | 1 |
| COX7B     | 0.459871478 | 2.21E-14 | 1 |

|          |             |          |   |
|----------|-------------|----------|---|
| LGALS1   | 0.459752799 | 2.25E-14 | 1 |
| SUSD4    | 0.459624457 | 2.29E-14 | 1 |
| U2AF1L4  | 0.459567145 | 2.31E-14 | 1 |
| RAB5A    | 0.459545915 | 2.32E-14 | 1 |
| DSTYK    | 0.45939663  | 2.37E-14 | 1 |
| CPEB4    | 0.459385884 | 2.37E-14 | 1 |
| C11orf41 | 0.459273226 | 2.41E-14 | 1 |
| CNRIP1   | 0.459095415 | 2.48E-14 | 1 |
| C21orf33 | 0.45907654  | 2.48E-14 | 1 |
| PIM2     | 0.458995286 | 2.51E-14 | 1 |
| GRIA2    | 0.458917996 | 2.54E-14 | 1 |
| HIGD2A   | 0.458893845 | 2.55E-14 | 1 |
| SLC24A2  | 0.458877332 | 2.56E-14 | 1 |
| YPEL2    | 0.458790106 | 2.59E-14 | 1 |
| PTPN11   | 0.458569794 | 2.67E-14 | 1 |
| SLC6A15  | 0.45851582  | 2.69E-14 | 1 |
| POLR2E   | 0.458502942 | 2.70E-14 | 1 |
| CADM3    | 0.458375599 | 2.75E-14 | 1 |
| PEX5L    | 0.458304724 | 2.78E-14 | 1 |
| MYCBP2   | 0.458296844 | 2.78E-14 | 1 |
| TMEM178  | 0.458231929 | 2.81E-14 | 1 |
| ARHGEF7  | 0.458158245 | 2.84E-14 | 1 |
| MED27    | 0.458108973 | 2.86E-14 | 1 |
| DDX1     | 0.458057219 | 2.88E-14 | 1 |
| PDE8B    | 0.457807832 | 2.99E-14 | 1 |
| RNF14    | 0.457753831 | 3.01E-14 | 1 |
| IDH3G    | 0.457709275 | 3.03E-14 | 1 |
| ATP8A1   | 0.457591137 | 3.08E-14 | 1 |
| NDUFA11  | 0.457443341 | 3.15E-14 | 1 |
| FBXW7    | 0.45722977  | 3.25E-14 | 1 |
| PLCB1    | 0.457199773 | 3.26E-14 | 1 |
| ACSL4    | 0.457188794 | 3.26E-14 | 1 |
| RGS12    | 0.457121038 | 3.30E-14 | 1 |
| PPP2R2B  | 0.457111131 | 3.30E-14 | 1 |
| ELAVL4   | 0.457029514 | 3.34E-14 | 1 |
| SPTBN1   | 0.456893177 | 3.41E-14 | 1 |
| HINT1    | 0.456570927 | 3.57E-14 | 1 |
| SLC48A1  | 0.456297731 | 3.71E-14 | 1 |
| CCDC85A  | 0.456273806 | 3.72E-14 | 1 |
| KIF5A    | 0.456193236 | 3.77E-14 | 1 |
| GLO1     | 0.45618009  | 3.77E-14 | 1 |
| CCDC104  | 0.456003    | 3.87E-14 | 1 |
| IL6ST    | 0.455939656 | 3.91E-14 | 1 |
| LCMT1    | 0.455910104 | 3.92E-14 | 1 |
| GOLGA8A  | 0.455785066 | 4.00E-14 | 1 |

|          |             |          |   |
|----------|-------------|----------|---|
| CLIP4    | 0.455593897 | 4.11E-14 | 1 |
| TCEAL1   | 0.455533944 | 4.14E-14 | 1 |
| CCDC25   | 0.455525158 | 4.15E-14 | 1 |
| PEX11B   | 0.455427502 | 4.21E-14 | 1 |
| NDUFB4   | 0.455361279 | 4.25E-14 | 1 |
| GOLGA8B  | 0.455231541 | 4.33E-14 | 1 |
| PPM1B    | 0.455012646 | 4.46E-14 | 1 |
| HTR2A    | 0.455010635 | 4.46E-14 | 1 |
| EEA1     | 0.455006389 | 4.47E-14 | 1 |
| TUBG2    | 0.454984071 | 4.48E-14 | 1 |
| C15orf24 | 0.454960731 | 4.50E-14 | 1 |
| GNAS     | 0.45493523  | 4.51E-14 | 1 |
| EVI5     | 0.454929218 | 4.52E-14 | 1 |
| NETO1    | 0.454777978 | 4.62E-14 | 1 |
| NUDT21   | 0.454687086 | 4.68E-14 | 1 |
| AASDHPPT | 0.454676595 | 4.68E-14 | 1 |
| PDIA3P   | 0.454639338 | 4.71E-14 | 1 |
| CDO1     | 0.454538053 | 4.78E-14 | 1 |
| CX3CL1   | 0.454512677 | 4.79E-14 | 1 |
| RIMS3    | 0.45442502  | 4.86E-14 | 1 |
| HSPH1    | 0.45437257  | 4.89E-14 | 1 |
| KLHDC5   | 0.454368069 | 4.89E-14 | 1 |
| BLOC1S2  | 0.454367506 | 4.90E-14 | 1 |
| SYT11    | 0.454258926 | 4.97E-14 | 1 |
| CMTM4    | 0.454250818 | 4.98E-14 | 1 |
| GMFB     | 0.454132559 | 5.06E-14 | 1 |
| ARL4C    | 0.453877194 | 5.25E-14 | 1 |
| LRRN3    | 0.453759131 | 5.34E-14 | 1 |
| UBE2E2   | 0.453751364 | 5.35E-14 | 1 |
| PTS      | 0.453725926 | 5.37E-14 | 1 |
| RSRC1    | 0.453569922 | 5.49E-14 | 1 |
| NDUFB10  | 0.453550793 | 5.50E-14 | 1 |
| HSPB3    | 0.453542981 | 5.51E-14 | 1 |
| TMED4    | 0.453423303 | 5.60E-14 | 1 |
| SLC2A3   | 0.453394495 | 5.62E-14 | 1 |
| ASPH     | 0.453209023 | 5.78E-14 | 1 |
| MRPL40   | 0.453180825 | 5.80E-14 | 1 |
| FTO      | 0.453120154 | 5.85E-14 | 1 |
| PCNP     | 0.45296734  | 5.98E-14 | 1 |
| BCAS2    | 0.452888562 | 6.04E-14 | 1 |
| FAM134A  | 0.452770924 | 6.15E-14 | 1 |
| CYSTM1   | 0.452719377 | 6.19E-14 | 1 |
| IDH3B    | 0.452438394 | 6.44E-14 | 1 |
| SSR4     | 0.452329933 | 6.54E-14 | 1 |
| ATP5A1   | 0.452278474 | 6.59E-14 | 1 |

|          |             |          |   |
|----------|-------------|----------|---|
| ARHGEF3  | 0.452242155 | 6.63E-14 | 1 |
| TSPAN3   | 0.452213404 | 6.65E-14 | 1 |
| TMEM30A  | 0.451834065 | 7.02E-14 | 1 |
| SLC25A27 | 0.451816155 | 7.04E-14 | 1 |
| CKMT1A   | 0.451794134 | 7.06E-14 | 1 |
| NR1D2    | 0.45171893  | 7.14E-14 | 1 |
| POLR2L   | 0.451654435 | 7.20E-14 | 1 |
| LRRTM3   | 0.451599478 | 7.26E-14 | 1 |
| FECH     | 0.45150823  | 7.35E-14 | 1 |
| O4-sep   | 0.451454484 | 7.41E-14 | 1 |
| C1orf43  | 0.451370032 | 7.50E-14 | 1 |
| CLIP1    | 0.451353267 | 7.52E-14 | 1 |
| SNX27    | 0.451301274 | 7.57E-14 | 1 |
| HDHD2    | 0.451174338 | 7.71E-14 | 1 |
| GADD45B  | 0.451164135 | 7.72E-14 | 1 |
| NAA10    | 0.451160367 | 7.72E-14 | 1 |
| PRKCZ    | 0.451137668 | 7.75E-14 | 1 |
| ZNF540   | 0.451136728 | 7.75E-14 | 1 |
| JAKMIP1  | 0.451107397 | 7.78E-14 | 1 |
| NPEPPS   | 0.451039095 | 7.86E-14 | 1 |
| PSMD12   | 0.451009692 | 7.89E-14 | 1 |
| SPG20    | 0.450993273 | 7.91E-14 | 1 |
| CRELD1   | 0.450674407 | 8.27E-14 | 1 |
| MBNL1    | 0.450590054 | 8.37E-14 | 1 |
| PPME1    | 0.450458903 | 8.53E-14 | 1 |
| ACAT1    | 0.450458237 | 8.53E-14 | 1 |
| EFNA5    | 0.450173152 | 8.88E-14 | 1 |
| WRB      | 0.449767318 | 9.40E-14 | 1 |
| PSMB3    | 0.449645175 | 9.57E-14 | 1 |
| TMEM59   | 0.449627758 | 9.59E-14 | 1 |
| APBA1    | 0.449585601 | 9.65E-14 | 1 |
| NFASC    | 0.449576647 | 9.66E-14 | 1 |
| CES4A    | 0.449509911 | 9.75E-14 | 1 |
| MAPK1    | 0.449166232 | 1.02E-13 | 1 |
| LMTK2    | 0.449050984 | 1.04E-13 | 1 |
| TMEM9B   | 0.448950331 | 1.05E-13 | 1 |
| RAP1GAP  | 0.448939472 | 1.06E-13 | 1 |
| IGSF8    | 0.44846436  | 1.13E-13 | 1 |
| RUSC2    | 0.448403603 | 1.14E-13 | 1 |
| CD81     | 0.448118379 | 1.19E-13 | 1 |
| UGP2     | 0.448079969 | 1.19E-13 | 1 |
| EPM2AIP1 | 0.447972811 | 1.21E-13 | 1 |
| INPP5F   | 0.447903608 | 1.22E-13 | 1 |
| ZNF385B  | 0.447544501 | 1.28E-13 | 1 |
| SEMA5A   | 0.447343211 | 1.32E-13 | 1 |

|              |             |          |   |
|--------------|-------------|----------|---|
| FAM49A       | 0.447271017 | 1.33E-13 | 1 |
| OLA1         | 0.447223624 | 1.34E-13 | 1 |
| FAM69A       | 0.447135313 | 1.36E-13 | 1 |
| NDFIP2       | 0.447017463 | 1.38E-13 | 1 |
| MRPS14       | 0.44698539  | 1.39E-13 | 1 |
| RAB27B       | 0.446903476 | 1.40E-13 | 1 |
| C20orf3      | 0.446848877 | 1.42E-13 | 1 |
| BECN1        | 0.446806357 | 1.42E-13 | 1 |
| WIPI2        | 0.446787226 | 1.43E-13 | 1 |
| LOC100505876 | 0.446677868 | 1.45E-13 | 1 |
| ABLIM1       | 0.446677768 | 1.45E-13 | 1 |
| SLC32A1      | 0.446503189 | 1.49E-13 | 1 |
| ARPP19       | 0.4457846   | 1.64E-13 | 1 |
| MIA3         | 0.445635071 | 1.68E-13 | 1 |
| UQCR11       | 0.445470932 | 1.71E-13 | 1 |
| ACTR2        | 0.445402996 | 1.73E-13 | 1 |
| RNF157       | 0.444834904 | 1.87E-13 | 1 |
| BNIP3L       | 0.444696674 | 1.91E-13 | 1 |
| ATP5F1       | 0.444674675 | 1.92E-13 | 1 |
| NDUFAF4      | 0.444568625 | 1.94E-13 | 1 |
| PCDH9        | 0.444537002 | 1.95E-13 | 1 |
| GRIA4        | 0.444523105 | 1.96E-13 | 1 |
| MTMR6        | 0.444467382 | 1.97E-13 | 1 |
| LOC147727    | 0.444326387 | 2.01E-13 | 1 |
| DNAJC3       | 0.444246452 | 2.03E-13 | 1 |
| HNRNPH2      | 0.44402416  | 2.10E-13 | 1 |
| PHKG2        | 0.443888034 | 2.14E-13 | 1 |
| ABHD14A      | 0.443788153 | 2.17E-13 | 1 |
| KLHDC3       | 0.443688137 | 2.20E-13 | 1 |
| C20orf30     | 0.443524951 | 2.25E-13 | 1 |
| PDE1B        | 0.44352422  | 2.25E-13 | 1 |
| ZNF25        | 0.443503945 | 2.25E-13 | 1 |
| CNIH         | 0.443333101 | 2.31E-13 | 1 |
| HSPB8        | 0.443294973 | 2.32E-13 | 1 |
| HSP90B1      | 0.443009387 | 2.41E-13 | 1 |
| UBE2V2       | 0.442968363 | 2.42E-13 | 1 |
| JAK1         | 0.442952818 | 2.43E-13 | 1 |
| CHP          | 0.4428824   | 2.45E-13 | 1 |
| MARCH6       | 0.442815996 | 2.48E-13 | 1 |
| TMEM111      | 0.442769527 | 2.49E-13 | 1 |
| AUP1         | 0.442766607 | 2.49E-13 | 1 |
| GRB2         | 0.442683879 | 2.52E-13 | 1 |
| SAT1         | 0.442528524 | 2.58E-13 | 1 |
| HTATSF1      | 0.442432743 | 2.61E-13 | 1 |
| MGLL         | 0.442370487 | 2.63E-13 | 1 |

|          |             |          |   |
|----------|-------------|----------|---|
| PSMD7    | 0.442365505 | 2.63E-13 | 1 |
| RAB5B    | 0.442300242 | 2.66E-13 | 1 |
| SLC10A4  | 0.442274691 | 2.67E-13 | 1 |
| ZBTB38   | 0.442228921 | 2.68E-13 | 1 |
| ATL1     | 0.442219694 | 2.69E-13 | 1 |
| LUC7L2   | 0.442160835 | 2.71E-13 | 1 |
| PAK3     | 0.442149152 | 2.71E-13 | 1 |
| DCTN2    | 0.442055547 | 2.75E-13 | 1 |
| MPHOSPH8 | 0.442020248 | 2.76E-13 | 1 |
| UFC1     | 0.441901649 | 2.81E-13 | 1 |
| CDH18    | 0.441795459 | 2.85E-13 | 1 |
| SKP1     | 0.441724496 | 2.88E-13 | 1 |
| WBSCR17  | 0.441710727 | 2.88E-13 | 1 |
| KHK      | 0.441634393 | 2.91E-13 | 1 |
| SORT1    | 0.441544034 | 2.95E-13 | 1 |
| MAPK10   | 0.441486236 | 2.97E-13 | 1 |
| CYB5B    | 0.441342107 | 3.03E-13 | 1 |
| ATP5I    | 0.441233514 | 3.08E-13 | 1 |
| SEC61A2  | 0.440987282 | 3.18E-13 | 1 |
| TIMM17A  | 0.44090595  | 3.22E-13 | 1 |
| MAGED1   | 0.440711942 | 3.30E-13 | 1 |
| MCFD2    | 0.440592109 | 3.36E-13 | 1 |
| STAC2    | 0.440422646 | 3.44E-13 | 1 |
| DNAJC18  | 0.440368723 | 3.46E-13 | 1 |
| CCT3     | 0.440206629 | 3.54E-13 | 1 |
| POLR2C   | 0.440168424 | 3.56E-13 | 1 |
| TTC1     | 0.440041374 | 3.62E-13 | 1 |
| AGPAT3   | 0.439992288 | 3.65E-13 | 1 |
| PDK3     | 0.439963988 | 3.66E-13 | 1 |
| CYB5R1   | 0.439948255 | 3.67E-13 | 1 |
| TM9SF4   | 0.439890292 | 3.70E-13 | 1 |
| TRNP1    | 0.439853809 | 3.71E-13 | 1 |
| HDDC2    | 0.439834252 | 3.72E-13 | 1 |
| QPCT     | 0.439790602 | 3.75E-13 | 1 |
| ZMAT3    | 0.439784217 | 3.75E-13 | 1 |
| AGL      | 0.439759373 | 3.76E-13 | 1 |
| PPP3CA   | 0.439750222 | 3.77E-13 | 1 |
| MAPK9    | 0.439748174 | 3.77E-13 | 1 |
| GALNTL4  | 0.439549331 | 3.87E-13 | 1 |
| NDUFAF1  | 0.439492252 | 3.90E-13 | 1 |
| CHURC1   | 0.439490129 | 3.90E-13 | 1 |
| RWDD2B   | 0.439435591 | 3.93E-13 | 1 |
| PNMA3    | 0.439429912 | 3.94E-13 | 1 |
| TTC33    | 0.439427473 | 3.94E-13 | 1 |
| RNF41    | 0.439383194 | 3.96E-13 | 1 |

|           |             |          |   |
|-----------|-------------|----------|---|
| DNAJA2    | 0.439248999 | 4.03E-13 | 1 |
| THYN1     | 0.439157813 | 4.08E-13 | 1 |
| STAG3L4   | 0.439153285 | 4.09E-13 | 1 |
| UPP1      | 0.438995475 | 4.18E-13 | 1 |
| RGS7      | 0.438935193 | 4.21E-13 | 1 |
| DAP3      | 0.438878673 | 4.24E-13 | 1 |
| VPS29     | 0.438815238 | 4.28E-13 | 1 |
| CDH13     | 0.43878882  | 4.29E-13 | 1 |
| RPAP3     | 0.43839931  | 4.53E-13 | 1 |
| C10orf118 | 0.438195738 | 4.65E-13 | 1 |
| ARL2      | 0.438112579 | 4.71E-13 | 1 |
| PFDN2     | 0.437888016 | 4.85E-13 | 1 |
| CCDC115   | 0.437687914 | 4.99E-13 | 1 |
| SCD5      | 0.437660554 | 5.00E-13 | 1 |
| SPAG16    | 0.437613095 | 5.04E-13 | 1 |
| CSMD3     | 0.437513012 | 5.11E-13 | 1 |
| COPS4     | 0.43738835  | 5.19E-13 | 1 |
| TMX4      | 0.437322407 | 5.24E-13 | 1 |
| FAF2      | 0.437271951 | 5.27E-13 | 1 |
| THTPA     | 0.437156807 | 5.36E-13 | 1 |
| ZFAND1    | 0.437144053 | 5.37E-13 | 1 |
| PDK2      | 0.437070441 | 5.42E-13 | 1 |
| CNTN4     | 0.437001449 | 5.47E-13 | 1 |
| GABRA2    | 0.436499567 | 5.85E-13 | 1 |
| TSNAX     | 0.43642644  | 5.91E-13 | 1 |
| SLC35A5   | 0.436273652 | 6.04E-13 | 1 |
| PLP1      | 0.436231148 | 6.07E-13 | 1 |
| VCP       | 0.436099961 | 6.18E-13 | 1 |
| TMEM151A  | 0.436063533 | 6.21E-13 | 1 |
| FDX1L     | 0.436062916 | 6.21E-13 | 1 |
| KCNT2     | 0.435976525 | 6.28E-13 | 1 |
| PDCD4     | 0.43572975  | 6.49E-13 | 1 |
| NUCB1     | 0.435664078 | 6.55E-13 | 1 |
| TMEM126B  | 0.435637934 | 6.57E-13 | 1 |
| LPPR4     | 0.435567906 | 6.64E-13 | 1 |
| C9orf4    | 0.435529595 | 6.67E-13 | 1 |
| VPS13A    | 0.43539899  | 6.79E-13 | 1 |
| CADPS     | 0.435310576 | 6.87E-13 | 1 |
| MTUS1     | 0.435269669 | 6.91E-13 | 1 |
| ISOC1     | 0.434580387 | 7.58E-13 | 1 |
| TMED10    | 0.434430894 | 7.73E-13 | 1 |
| PRAF2     | 0.434426348 | 7.74E-13 | 1 |
| FAM217B   | 0.434379804 | 7.78E-13 | 1 |
| ERI3      | 0.434215338 | 7.96E-13 | 1 |
| BOLA3     | 0.434200597 | 7.97E-13 | 1 |

|           |             |          |   |
|-----------|-------------|----------|---|
| CXCL14    | 0.434193476 | 7.98E-13 | 1 |
| MRPL15    | 0.434184462 | 7.99E-13 | 1 |
| PRPS2     | 0.43401699  | 8.17E-13 | 1 |
| BLVRA     | 0.433771063 | 8.44E-13 | 1 |
| UCHL5     | 0.433766014 | 8.45E-13 | 1 |
| SAR1B     | 0.433712969 | 8.51E-13 | 1 |
| MRPL38    | 0.43366264  | 8.57E-13 | 1 |
| NDUFV2    | 0.433655647 | 8.58E-13 | 1 |
| UNC79     | 0.433611347 | 8.63E-13 | 1 |
| TCEB2     | 0.4335174   | 8.74E-13 | 1 |
| PPARGC1A  | 0.43348912  | 8.77E-13 | 1 |
| TUFM      | 0.43342506  | 8.84E-13 | 1 |
| STK16     | 0.433393578 | 8.88E-13 | 1 |
| ANK3      | 0.433332718 | 8.95E-13 | 1 |
| RNF6      | 0.433244716 | 9.06E-13 | 1 |
| STX1B     | 0.433019588 | 9.34E-13 | 1 |
| DIRAS3    | 0.432770194 | 9.65E-13 | 1 |
| DOCK10    | 0.432664168 | 9.79E-13 | 1 |
| TOMM7     | 0.4326281   | 9.84E-13 | 1 |
| NECAB1    | 0.432475011 | 1.00E-12 | 1 |
| CACNG3    | 0.432191313 | 1.04E-12 | 1 |
| CHGA      | 0.432129204 | 1.05E-12 | 1 |
| ZRANB2    | 0.432048468 | 1.06E-12 | 1 |
| KHDRBS2   | 0.431840005 | 1.09E-12 | 1 |
| LAPTM4B   | 0.43183532  | 1.09E-12 | 1 |
| VPS4B     | 0.431695181 | 1.11E-12 | 1 |
| CNPY2     | 0.431552774 | 1.13E-12 | 1 |
| ZNF706    | 0.431237698 | 1.18E-12 | 1 |
| CLIP3     | 0.431221187 | 1.19E-12 | 1 |
| MYO5A     | 0.431201121 | 1.19E-12 | 1 |
| LOC645212 | 0.43114242  | 1.20E-12 | 1 |
| HSD17B4   | 0.431067508 | 1.21E-12 | 1 |
| PKIB      | 0.431019968 | 1.22E-12 | 1 |
| AMN1      | 0.430860579 | 1.24E-12 | 1 |
| SKAP2     | 0.430847372 | 1.25E-12 | 1 |
| MINA      | 0.430376459 | 1.33E-12 | 1 |
| LOC344967 | 0.430246259 | 1.35E-12 | 1 |
| PCLO      | 0.430151331 | 1.37E-12 | 1 |
| KSR2      | 0.430110239 | 1.37E-12 | 1 |
| VT11B     | 0.430064623 | 1.38E-12 | 1 |
| CAMLG     | 0.429969742 | 1.40E-12 | 1 |
| FUT9      | 0.429961554 | 1.40E-12 | 1 |
| TRIM9     | 0.4299514   | 1.40E-12 | 1 |
| MCF2      | 0.429800043 | 1.43E-12 | 1 |
| TMEM132B  | 0.429613322 | 1.47E-12 | 1 |



|          |             |          |   |
|----------|-------------|----------|---|
| DNAJB1   | 0.429573622 | 1.47E-12 | 1 |
| DHRS7B   | 0.429494116 | 1.49E-12 | 1 |
| SELT     | 0.429490994 | 1.49E-12 | 1 |
| TOMM6    | 0.429422165 | 1.50E-12 | 1 |
| CLTB     | 0.429399845 | 1.51E-12 | 1 |
| RBP4     | 0.429320932 | 1.52E-12 | 1 |
| C12orf76 | 0.429180757 | 1.55E-12 | 1 |
| ARFGAP2  | 0.429162905 | 1.56E-12 | 1 |
| FXD7     | 0.429101773 | 1.57E-12 | 1 |
| TUBGCP4  | 0.429099493 | 1.57E-12 | 1 |
| RRAGD    | 0.429006257 | 1.59E-12 | 1 |
| PMVK     | 0.428846608 | 1.62E-12 | 1 |
| OSBPL8   | 0.428395921 | 1.72E-12 | 1 |
| TRMT11   | 0.428262344 | 1.75E-12 | 1 |
| COX6C    | 0.42825788  | 1.75E-12 | 1 |
| MPP5     | 0.428165727 | 1.77E-12 | 1 |
| VAT1L    | 0.427868659 | 1.84E-12 | 1 |
| COX7A2   | 0.427821808 | 1.86E-12 | 1 |
| RASD1    | 0.427804767 | 1.86E-12 | 1 |
| FBXO9    | 0.427710023 | 1.88E-12 | 1 |
| DLX1     | 0.427555455 | 1.92E-12 | 1 |
| PFKP     | 0.427537156 | 1.93E-12 | 1 |
| CACNA1B  | 0.427529967 | 1.93E-12 | 1 |
| PDGFA    | 0.427452108 | 1.95E-12 | 1 |
| MZT2B    | 0.427394998 | 1.96E-12 | 1 |
| MRPL51   | 0.427349395 | 1.97E-12 | 1 |
| ARHGEF4  | 0.427325439 | 1.98E-12 | 1 |
| SLC25A5  | 0.427171134 | 2.02E-12 | 1 |
| TSC22D3  | 0.427111954 | 2.04E-12 | 1 |
| RNF141   | 0.427031174 | 2.06E-12 | 1 |
| GMPR2    | 0.426880842 | 2.10E-12 | 1 |
| RND2     | 0.426748231 | 2.14E-12 | 1 |
| LRRFIP2  | 0.426665075 | 2.16E-12 | 1 |
| MUT      | 0.426598965 | 2.18E-12 | 1 |
| MANBAL   | 0.426505825 | 2.20E-12 | 1 |
| EPDR1    | 0.426486099 | 2.21E-12 | 1 |
| LGI2     | 0.426473691 | 2.21E-12 | 1 |
| SERGEF   | 0.426406833 | 2.23E-12 | 1 |
| DST      | 0.42589015  | 2.39E-12 | 1 |
| C19orf12 | 0.425756597 | 2.43E-12 | 1 |
| SRSF8    | 0.42574897  | 2.43E-12 | 1 |
| DYNC1I1  | 0.425744263 | 2.43E-12 | 1 |
| ANKRD26  | 0.425585006 | 2.49E-12 | 1 |
| UBE2Z    | 0.425581886 | 2.49E-12 | 1 |
| CACYBP   | 0.425448947 | 2.53E-12 | 1 |

|          |             |          |   |
|----------|-------------|----------|---|
| B2M      | 0.425442649 | 2.53E-12 | 1 |
| CALY     | 0.424948631 | 2.70E-12 | 1 |
| ODZ2     | 0.42489783  | 2.72E-12 | 1 |
| TRAPPC2L | 0.42483634  | 2.74E-12 | 1 |
| ITFG1    | 0.424696646 | 2.79E-12 | 1 |
| KIAA1045 | 0.424432515 | 2.89E-12 | 1 |
| PITPNA   | 0.424365301 | 2.91E-12 | 1 |
| C12orf57 | 0.424054328 | 3.03E-12 | 1 |
| TSFM     | 0.42391807  | 3.09E-12 | 1 |
| RCN2     | 0.423815801 | 3.13E-12 | 1 |
| TMEM208  | 0.423804398 | 3.13E-12 | 1 |
| HSPB11   | 0.42359189  | 3.22E-12 | 1 |
| WARS     | 0.423498635 | 3.26E-12 | 1 |
| VPS13D   | 0.423472756 | 3.27E-12 | 1 |
| WDR5B    | 0.423333898 | 3.33E-12 | 1 |
| PRDM2    | 0.423303114 | 3.34E-12 | 1 |
| SPEF2    | 0.423261829 | 3.36E-12 | 1 |
| ARPC1A   | 0.423235831 | 3.37E-12 | 1 |
| KCND2    | 0.423172441 | 3.40E-12 | 1 |
| CCDC28A  | 0.423068887 | 3.44E-12 | 1 |
| PLA2G16  | 0.423043976 | 3.45E-12 | 1 |
| CAST     | 0.422941492 | 3.50E-12 | 1 |
| CACNA1D  | 0.422699057 | 3.61E-12 | 1 |
| RAPGEF2  | 0.422582672 | 3.67E-12 | 1 |
| C15orf57 | 0.422579522 | 3.67E-12 | 1 |
| RPN1     | 0.422448445 | 3.73E-12 | 1 |
| PAM      | 0.42236898  | 3.77E-12 | 1 |
| MBNL2    | 0.422233926 | 3.83E-12 | 1 |
| MRPL16   | 0.422225191 | 3.84E-12 | 1 |
| LIN7B    | 0.422208831 | 3.85E-12 | 1 |
| CYB5D2   | 0.422119631 | 3.89E-12 | 1 |
| SLC23A2  | 0.422117313 | 3.89E-12 | 1 |
| RASGEF1A | 0.421942488 | 3.98E-12 | 1 |
| UQCRHL   | 0.42188467  | 4.01E-12 | 1 |
| ADAM22   | 0.421845542 | 4.03E-12 | 1 |
| CCPG1    | 0.421762692 | 4.07E-12 | 1 |
| ATP5J    | 0.421608963 | 4.16E-12 | 1 |
| GPR162   | 0.42156258  | 4.18E-12 | 1 |
| ENTPD6   | 0.421476449 | 4.23E-12 | 1 |
| GPHN     | 0.421424724 | 4.25E-12 | 1 |
| LARP1    | 0.421373421 | 4.28E-12 | 1 |
| PYGB     | 0.421149026 | 4.41E-12 | 1 |
| ERGIC2   | 0.421083933 | 4.44E-12 | 1 |
| SNX32    | 0.421027435 | 4.48E-12 | 1 |
| ZNF365   | 0.420997718 | 4.49E-12 | 1 |

|         |             |          |   |
|---------|-------------|----------|---|
| VPS53   | 0.420993708 | 4.50E-12 | 1 |
| SEMA4D  | 0.420862333 | 4.57E-12 | 1 |
| GSTM4   | 0.420735494 | 4.65E-12 | 1 |
| SSFA2   | 0.420554093 | 4.76E-12 | 1 |
| CPEB3   | 0.420531604 | 4.77E-12 | 1 |
| IMP3    | 0.420517558 | 4.78E-12 | 1 |
| HCN1    | 0.420491346 | 4.79E-12 | 1 |
| MNAT1   | 0.420328288 | 4.90E-12 | 1 |
| PAAF1   | 0.420266716 | 4.93E-12 | 1 |
| TOMM5   | 0.420241717 | 4.95E-12 | 1 |
| DLG2    | 0.420155249 | 5.01E-12 | 1 |
| PDZD11  | 0.420132744 | 5.02E-12 | 1 |
| PPIE    | 0.420131903 | 5.02E-12 | 1 |
| MLF2    | 0.420079514 | 5.05E-12 | 1 |
| RRAGA   | 0.419901223 | 5.17E-12 | 1 |
| SRA1    | 0.419807165 | 5.23E-12 | 1 |
| AKAP1   | 0.41961037  | 5.37E-12 | 1 |
| PDK1    | 0.419532846 | 5.42E-12 | 1 |
| UQCRBP1 | 0.419437567 | 5.49E-12 | 1 |
| PLEKHA1 | 0.419110686 | 5.72E-12 | 1 |
| NAP1L4  | 0.419062979 | 5.75E-12 | 1 |
| RNPC3   | 0.418921643 | 5.86E-12 | 1 |
| TOMM20  | 0.418851645 | 5.91E-12 | 1 |
| NRIP2   | 0.418800582 | 5.95E-12 | 1 |
| ACP1    | 0.418634415 | 6.08E-12 | 1 |
| BHLHB9  | 0.418620084 | 6.09E-12 | 1 |
| OSTM1   | 0.418515635 | 6.17E-12 | 1 |
| KLHDC2  | 0.418489266 | 6.19E-12 | 1 |
| NR1D1   | 0.418463207 | 6.21E-12 | 1 |
| KIF3B   | 0.418422635 | 6.24E-12 | 1 |
| BCAN    | 0.418323356 | 6.32E-12 | 1 |
| SYT14   | 0.418178094 | 6.44E-12 | 1 |
| SULT1A1 | 0.418063191 | 6.53E-12 | 1 |
| KLF9    | 0.417933501 | 6.64E-12 | 1 |
| ZFAND2A | 0.417896243 | 6.67E-12 | 1 |
| AMD1    | 0.417750092 | 6.80E-12 | 1 |
| VAPB    | 0.417497237 | 7.02E-12 | 1 |
| TMTC3   | 0.417485761 | 7.03E-12 | 1 |
| PLEKHA5 | 0.417454546 | 7.06E-12 | 1 |
| WDR41   | 0.417396488 | 7.11E-12 | 1 |
| PSMA7   | 0.417252934 | 7.24E-12 | 1 |
| MGAT4A  | 0.417212485 | 7.28E-12 | 1 |
| MRPS23  | 0.417167382 | 7.32E-12 | 1 |
| CCND3   | 0.417161812 | 7.32E-12 | 1 |
| CNP     | 0.417096816 | 7.38E-12 | 1 |

|           |             |          |   |
|-----------|-------------|----------|---|
| SLC27A5   | 0.417057701 | 7.42E-12 | 1 |
| FMN2      | 0.417021411 | 7.46E-12 | 1 |
| ANAPC11   | 0.416953424 | 7.52E-12 | 1 |
| GPATCH4   | 0.416865993 | 7.60E-12 | 1 |
| TSC22D1   | 0.416858225 | 7.61E-12 | 1 |
| PPID      | 0.416666054 | 7.80E-12 | 1 |
| NAA20     | 0.416533377 | 7.93E-12 | 1 |
| MTX2      | 0.416458188 | 8.01E-12 | 1 |
| VIP       | 0.41644235  | 8.02E-12 | 1 |
| APOA1BP   | 0.416424553 | 8.04E-12 | 1 |
| RYBP      | 0.416302284 | 8.16E-12 | 1 |
| EIF3K     | 0.416228001 | 8.24E-12 | 1 |
| NDUFA6    | 0.416147327 | 8.33E-12 | 1 |
| TERF2     | 0.416128155 | 8.35E-12 | 1 |
| AFTPH     | 0.415990318 | 8.49E-12 | 1 |
| RAB3B     | 0.415819766 | 8.68E-12 | 1 |
| SAE1      | 0.415731357 | 8.77E-12 | 1 |
| TUBB4B    | 0.415728509 | 8.78E-12 | 1 |
| KGFLP2    | 0.415608032 | 8.91E-12 | 1 |
| MORF4L2   | 0.41560337  | 8.92E-12 | 1 |
| SNRK      | 0.415547449 | 8.98E-12 | 1 |
| RAB11FIP4 | 0.415519359 | 9.01E-12 | 1 |
| ARMC8     | 0.415484489 | 9.05E-12 | 1 |
| GLYR1     | 0.415300302 | 9.26E-12 | 1 |
| ANO4      | 0.415199655 | 9.38E-12 | 1 |
| PSMC4     | 0.415120209 | 9.48E-12 | 1 |
| TRAPPC1   | 0.415041235 | 9.57E-12 | 1 |
| SLC4A1AP  | 0.415018384 | 9.60E-12 | 1 |
| DYRK4     | 0.414904513 | 9.74E-12 | 1 |
| ETFDH     | 0.414876607 | 9.77E-12 | 1 |
| MRPL54    | 0.414863016 | 9.79E-12 | 1 |
| MRFAP1L1  | 0.414581607 | 1.01E-11 | 1 |
| RABAC1    | 0.414381146 | 1.04E-11 | 1 |
| SCP2      | 0.414148291 | 1.07E-11 | 1 |
| TMX2      | 0.413918358 | 1.10E-11 | 1 |
| C1orf96   | 0.413858813 | 1.11E-11 | 1 |
| KCTD3     | 0.413770243 | 1.12E-11 | 1 |
| SMARCA1   | 0.413768393 | 1.12E-11 | 1 |
| GSTK1     | 0.413747731 | 1.13E-11 | 1 |
| SRI       | 0.413744308 | 1.13E-11 | 1 |
| MAPRE2    | 0.41359677  | 1.15E-11 | 1 |
| LNP1      | 0.413562711 | 1.15E-11 | 1 |
| NDUFS1    | 0.413554912 | 1.15E-11 | 1 |
| NDUFS6    | 0.413524117 | 1.16E-11 | 1 |
| ACOT8     | 0.413504205 | 1.16E-11 | 1 |

|          |             |          |   |
|----------|-------------|----------|---|
| KIAA1797 | 0.413474925 | 1.16E-11 | 1 |
| GRINA    | 0.413331783 | 1.19E-11 | 1 |
| NGLY1    | 0.413197417 | 1.21E-11 | 1 |
| MRPS15   | 0.413095421 | 1.22E-11 | 1 |
| SLC25A23 | 0.413050234 | 1.23E-11 | 1 |
| ELOVL4   | 0.41299834  | 1.24E-11 | 1 |
| PSD3     | 0.412847487 | 1.26E-11 | 1 |
| BTBD3    | 0.412836549 | 1.26E-11 | 1 |
| FNDC9    | 0.412832689 | 1.26E-11 | 1 |
| ZDHHC22  | 0.412832322 | 1.26E-11 | 1 |
| PHYHIP   | 0.412818    | 1.26E-11 | 1 |
| NOP56    | 0.412806331 | 1.27E-11 | 1 |
| PLEKHM3  | 0.412716036 | 1.28E-11 | 1 |
| NACC2    | 0.412601143 | 1.30E-11 | 1 |
| RANGAP1  | 0.412415224 | 1.33E-11 | 1 |
| MAN1A2   | 0.412334867 | 1.34E-11 | 1 |
| SLC35F1  | 0.412260481 | 1.36E-11 | 1 |
| FAM13B   | 0.412227439 | 1.36E-11 | 1 |
| STAT4    | 0.412198592 | 1.37E-11 | 1 |
| CRY2     | 0.412043476 | 1.39E-11 | 1 |
| UBXN11   | 0.412021323 | 1.40E-11 | 1 |
| PAFAH1B1 | 0.411874875 | 1.42E-11 | 1 |
| NTPCR    | 0.411857955 | 1.42E-11 | 1 |
| DPM3     | 0.411841383 | 1.43E-11 | 1 |
| C5orf41  | 0.411772932 | 1.44E-11 | 1 |
| MFSD4    | 0.411528694 | 1.48E-11 | 1 |
| IFNGR2   | 0.411461889 | 1.50E-11 | 1 |
| SSR3     | 0.411424559 | 1.50E-11 | 1 |
| SIK3     | 0.411380403 | 1.51E-11 | 1 |
| SYNE1    | 0.411378748 | 1.51E-11 | 1 |
| TUSC3    | 0.411152283 | 1.56E-11 | 1 |
| DPP10    | 0.41112683  | 1.56E-11 | 1 |
| CHMP2A   | 0.41103733  | 1.58E-11 | 1 |
| NR3C2    | 0.411012592 | 1.58E-11 | 1 |
| OLFM3    | 0.410831563 | 1.62E-11 | 1 |
| SLC25A46 | 0.410683393 | 1.65E-11 | 1 |
| CALM2    | 0.410503026 | 1.69E-11 | 1 |
| ATP5O    | 0.410360915 | 1.72E-11 | 1 |
| TMEM192  | 0.410354344 | 1.72E-11 | 1 |
| ACCN1    | 0.410323584 | 1.72E-11 | 1 |
| ACADSB   | 0.41031225  | 1.73E-11 | 1 |
| TRAPPC4  | 0.410293018 | 1.73E-11 | 1 |
| RWDD2A   | 0.410206623 | 1.75E-11 | 1 |
| RAD51C   | 0.409987826 | 1.80E-11 | 1 |
| MRPL32   | 0.409943497 | 1.81E-11 | 1 |

|          |             |          |   |
|----------|-------------|----------|---|
| PIP4K2C  | 0.409932491 | 1.81E-11 | 1 |
| PRDX2    | 0.409929389 | 1.81E-11 | 1 |
| GGCT     | 0.409895297 | 1.82E-11 | 1 |
| NUCKS1   | 0.409802357 | 1.84E-11 | 1 |
| ITSN2    | 0.409679353 | 1.87E-11 | 1 |
| NDUFA10  | 0.409614011 | 1.88E-11 | 1 |
| ARHGAP12 | 0.409501418 | 1.91E-11 | 1 |
| CFL2     | 0.409483094 | 1.91E-11 | 1 |
| RPA2     | 0.409294563 | 1.96E-11 | 1 |
| RAB11A   | 0.409216307 | 1.98E-11 | 1 |
| CUEDC2   | 0.409121902 | 2.00E-11 | 1 |
| GRIK1    | 0.40899076  | 2.03E-11 | 1 |
| NBEA     | 0.408960705 | 2.04E-11 | 1 |
| HERC2    | 0.408956923 | 2.04E-11 | 1 |
| PSME1    | 0.408927109 | 2.05E-11 | 1 |
| EXTL2    | 0.408861697 | 2.06E-11 | 1 |
| TSC1     | 0.408830779 | 2.07E-11 | 1 |
| AKIRIN2  | 0.408755759 | 2.09E-11 | 1 |
| JAZF1    | 0.408730764 | 2.10E-11 | 1 |
| BAI3     | 0.408672942 | 2.11E-11 | 1 |
| GUK1     | 0.40849835  | 2.16E-11 | 1 |
| AAK1     | 0.408434795 | 2.18E-11 | 1 |
| ZC3H15   | 0.40805155  | 2.28E-11 | 1 |
| THSD7A   | 0.407748102 | 2.37E-11 | 1 |
| GDI1     | 0.40774137  | 2.37E-11 | 1 |
| YARS     | 0.40771029  | 2.38E-11 | 1 |
| B3GALTL  | 0.407558437 | 2.42E-11 | 1 |
| NFX1     | 0.407495181 | 2.44E-11 | 1 |
| MSH2     | 0.407441721 | 2.46E-11 | 1 |
| NR2F2    | 0.407237916 | 2.52E-11 | 1 |
| TUBB2A   | 0.407210406 | 2.53E-11 | 1 |
| PNMAL2   | 0.407058134 | 2.58E-11 | 1 |
| PIGK     | 0.406955987 | 2.61E-11 | 1 |
| APOO     | 0.406921667 | 2.62E-11 | 1 |
| C3orf75  | 0.406781201 | 2.66E-11 | 1 |
| MRPS28   | 0.406313921 | 2.82E-11 | 1 |
| KCNQ5    | 0.406148963 | 2.88E-11 | 1 |
| LSM10    | 0.406119218 | 2.89E-11 | 1 |
| UBE4A    | 0.406048885 | 2.91E-11 | 1 |
| CSTB     | 0.40592227  | 2.96E-11 | 1 |
| LSM4     | 0.405607186 | 3.07E-11 | 1 |
| TMEM126A | 0.405534483 | 3.10E-11 | 1 |
| GPR123   | 0.405516173 | 3.11E-11 | 1 |
| IMPA1    | 0.405489911 | 3.12E-11 | 1 |
| MRPL27   | 0.405461753 | 3.13E-11 | 1 |

|          |             |          |   |
|----------|-------------|----------|---|
| TBCA     | 0.405443012 | 3.14E-11 | 1 |
| ASNA1    | 0.405331417 | 3.18E-11 | 1 |
| SIRT2    | 0.405298514 | 3.19E-11 | 1 |
| SERF2    | 0.405225617 | 3.22E-11 | 1 |
| MPP1     | 0.405176069 | 3.24E-11 | 1 |
| C1orf51  | 0.405170104 | 3.24E-11 | 1 |
| C7orf63  | 0.405153408 | 3.25E-11 | 1 |
| RPS4Y1   | 0.405120475 | 3.26E-11 | 1 |
| GLOD4    | 0.405093515 | 3.27E-11 | 1 |
| TIMM17B  | 0.405007095 | 3.31E-11 | 1 |
| NSMCE1   | 0.405004715 | 3.31E-11 | 1 |
| PDXP     | 0.404977064 | 3.32E-11 | 1 |
| CHM      | 0.404938739 | 3.33E-11 | 1 |
| PSMD4    | 0.404934319 | 3.34E-11 | 1 |
| IVD      | 0.404860815 | 3.37E-11 | 1 |
| C11orf1  | 0.404724157 | 3.42E-11 | 1 |
| RNF11    | 0.404708494 | 3.43E-11 | 1 |
| GABRG1   | 0.404625241 | 3.46E-11 | 1 |
| ATP5G2   | 0.404565061 | 3.49E-11 | 1 |
| TOX4     | 0.404353776 | 3.58E-11 | 1 |
| SERTM1   | 0.40408896  | 3.70E-11 | 1 |
| INPP4A   | 0.404078251 | 3.70E-11 | 1 |
| PDS5B    | 0.404067374 | 3.71E-11 | 1 |
| DMXL2    | 0.404047539 | 3.72E-11 | 1 |
| MTUS2    | 0.403975276 | 3.75E-11 | 1 |
| C3orf26  | 0.403892149 | 3.79E-11 | 1 |
| MRPS5    | 0.403837951 | 3.81E-11 | 1 |
| TUBGCP5  | 0.403827546 | 3.82E-11 | 1 |
| C14orf43 | 0.403808836 | 3.82E-11 | 1 |
| TPM1     | 0.403787364 | 3.83E-11 | 1 |
| GLS2     | 0.40376855  | 3.84E-11 | 1 |
| WDR75    | 0.403713448 | 3.87E-11 | 1 |
| OAZ2     | 0.403291014 | 4.07E-11 | 1 |
| ACO2     | 0.403260126 | 4.09E-11 | 1 |
| ELMOD1   | 0.403243568 | 4.10E-11 | 1 |
| CMBL     | 0.403199156 | 4.12E-11 | 1 |
| GABARAP  | 0.403087748 | 4.17E-11 | 1 |
| MICAL2   | 0.403022383 | 4.21E-11 | 1 |
| FAM153B  | 0.402897243 | 4.27E-11 | 1 |
| PPA2     | 0.402876458 | 4.28E-11 | 1 |
| RAB1B    | 0.402835457 | 4.30E-11 | 1 |
| BRE      | 0.402766139 | 4.34E-11 | 1 |
| KLHL12   | 0.402734863 | 4.35E-11 | 1 |
| ZC3H13   | 0.402593438 | 4.43E-11 | 1 |
| AP2S1    | 0.402540875 | 4.46E-11 | 1 |

|              |             |          |   |
|--------------|-------------|----------|---|
| LYRM5        | 0.402504596 | 4.48E-11 | 1 |
| SPTAN1       | 0.402418398 | 4.52E-11 | 1 |
| TMEM25       | 0.402322874 | 4.58E-11 | 1 |
| CHPT1        | 0.402295432 | 4.59E-11 | 1 |
| PRKCA        | 0.402254287 | 4.61E-11 | 1 |
| FBXL2        | 0.40224846  | 4.62E-11 | 1 |
| TLE2         | 0.402191289 | 4.65E-11 | 1 |
| GRIA1        | 0.402162561 | 4.67E-11 | 1 |
| HAX1         | 0.402059584 | 4.72E-11 | 1 |
| ZDHHC17      | 0.402024129 | 4.74E-11 | 1 |
| TGFB2        | 0.401951849 | 4.79E-11 | 1 |
| LOC157627    | 0.40191458  | 4.81E-11 | 1 |
| N4BP2L1      | 0.401787774 | 4.88E-11 | 1 |
| LOC100128264 | 0.401786784 | 4.88E-11 | 1 |
| RPS6KA2      | 0.401716099 | 4.92E-11 | 1 |
| NME2         | 0.401714935 | 4.92E-11 | 1 |
| SLC35B4      | 0.401701303 | 4.93E-11 | 1 |
| SMYD3        | 0.401691535 | 4.94E-11 | 1 |
| C1orf63      | 0.401660204 | 4.96E-11 | 1 |
| CHST15       | 0.401630346 | 4.97E-11 | 1 |
| SVIP         | 0.401478331 | 5.07E-11 | 1 |
| RIMS1        | 0.401476415 | 5.07E-11 | 1 |
| MAN2A2       | 0.401468107 | 5.07E-11 | 1 |
| WBP4         | 0.401435058 | 5.09E-11 | 1 |
| ENPP4        | 0.401340704 | 5.15E-11 | 1 |
| SUPT5H       | 0.401327814 | 5.16E-11 | 1 |
| FAM102B      | 0.40129244  | 5.18E-11 | 1 |
| ANKRD46      | 0.401196701 | 5.24E-11 | 1 |
| FAR1         | 0.401120698 | 5.29E-11 | 1 |
| CACNB4       | 0.400754787 | 5.53E-11 | 1 |
| SNCG         | 0.400742071 | 5.53E-11 | 1 |
| LINC00116    | 0.400739305 | 5.54E-11 | 1 |
| CISD2        | 0.400738995 | 5.54E-11 | 1 |
| FAM200B      | 0.400731338 | 5.54E-11 | 1 |
| SDF2         | 0.400729585 | 5.54E-11 | 1 |
| CNDP2        | 0.400720806 | 5.55E-11 | 1 |
| BTRC         | 0.400644721 | 5.60E-11 | 1 |
| EPB41L2      | 0.400634547 | 5.61E-11 | 1 |
| VAPA         | 0.400603745 | 5.63E-11 | 1 |
| TMEM155      | 0.400545259 | 5.67E-11 | 1 |
| FHL1         | 0.4003278   | 5.81E-11 | 1 |
| NDUFC2       | 0.400193407 | 5.91E-11 | 1 |
| CYHR1        | 0.400169317 | 5.93E-11 | 1 |
| MRPS9        | 0.400138683 | 5.95E-11 | 1 |
| CCNC         | 0.400117146 | 5.96E-11 | 1 |



|          |              |          |   |
|----------|--------------|----------|---|
| HSPA13   | 0.40010809   | 5.97E-11 | 1 |
| ROCK2    | 0.399992705  | 6.05E-11 | 1 |
| ERP29    | 0.399982826  | 6.06E-11 | 1 |
| HSPA4    | 0.399831818  | 6.17E-11 | 1 |
| OBFC2B   | 0.399759822  | 6.22E-11 | 1 |
| RPP25    | 0.39974316   | 6.24E-11 | 1 |
| UBR2     | 0.399525558  | 6.40E-11 | 1 |
| AP4S1    | 0.399520915  | 6.40E-11 | 1 |
| TYW3     | 0.399214554  | 6.64E-11 | 1 |
| PDCD6    | 0.399199572  | 6.65E-11 | 1 |
| TTBK2    | 0.399153013  | 6.69E-11 | 1 |
| NR4A1    | 0.398978398  | 6.83E-11 | 1 |
| UBL3     | 0.398849753  | 6.94E-11 | 1 |
| SCN8A    | 0.398637481  | 7.11E-11 | 1 |
| C15orf61 | 0.398551879  | 7.19E-11 | 1 |
| PPM1A    | 0.398390797  | 7.33E-11 | 1 |
| PCDH7    | 0.398326332  | 7.38E-11 | 1 |
| INPP1    | 0.398270814  | 7.43E-11 | 1 |
| GGNBP2   | 0.398002511  | 7.67E-11 | 1 |
| RASGRF2  | 0.397895594  | 7.77E-11 | 1 |
| SYBU     | 0.397876816  | 7.79E-11 | 1 |
| TIMMDC1  | 0.39783972   | 7.82E-11 | 1 |
| PDPK1    | 0.397731315  | 7.92E-11 | 1 |
| DDX50    | 0.397337652  | 8.30E-11 | 1 |
| DDB1     | 0.39721945   | 8.42E-11 | 1 |
| PRDX1    | 0.397188983  | 8.45E-11 | 1 |
| MAP2K1   | 0.397119315  | 8.52E-11 | 1 |
| CCDC144A | 0.397074043  | 8.56E-11 | 1 |
| MEF2C    | 0.396669858  | 8.98E-11 | 1 |
| ADD3     | 0.396558029  | 9.10E-11 | 1 |
| LPGAT1   | 0.396527499  | 9.14E-11 | 1 |
| ERAP1    | 0.396212439  | 9.48E-11 | 1 |
| CDH10    | 0.396203548  | 9.49E-11 | 1 |
| UBE2B    | 0.396042674  | 9.67E-11 | 1 |
| WDR45    | 0.396000389  | 9.72E-11 | 1 |
| GSTM2    | 0.395931388  | 9.80E-11 | 1 |
| PPP2CB   | 0.395908112  | 9.83E-11 | 1 |
| ZNF273   | 0.395866955  | 9.88E-11 | 1 |
| TMSB15A  | -0.40249316  | 4.48E-11 | 1 |
| MEX3A    | -0.428239452 | 1.76E-12 | 1 |
| SOX4     | -0.446932357 | 1.40E-13 | 1 |
| NHSL1    | -0.492557347 | 1.46E-16 | 1 |
| SOX11    | -0.543942275 | 1.69E-20 | 1 |
| TUBA1A   | 0.847471054  | 1.31E-69 | 2 |
| MAP1B    | 0.799666638  | 2.02E-56 | 2 |

|              |             |          |   |
|--------------|-------------|----------|---|
| EEF1A1       | 0.781643751 | 2.40E-52 | 2 |
| DPYSL2       | 0.761602777 | 3.00E-48 | 2 |
| RPLP0        | 0.735531264 | 1.74E-43 | 2 |
| ACTG1        | 0.729621966 | 1.75E-42 | 2 |
| ACTB         | 0.725553355 | 8.25E-42 | 2 |
| RPL5         | 0.717957001 | 1.39E-40 | 2 |
| RPS19        | 0.713498769 | 7.00E-40 | 2 |
| RPS29        | 0.695270937 | 3.80E-37 | 2 |
| EEF1G        | 0.688209698 | 3.85E-36 | 2 |
| SOX4         | 0.687798585 | 4.39E-36 | 2 |
| RPS14        | 0.685152385 | 1.03E-35 | 2 |
| MARCKS       | 0.682463339 | 2.41E-35 | 2 |
| HMGCS1       | 0.676696334 | 1.46E-34 | 2 |
| RPS3         | 0.670948834 | 8.42E-34 | 2 |
| PTMA         | 0.668568372 | 1.72E-33 | 2 |
| RPS13        | 0.659442291 | 2.51E-32 | 2 |
| SOX11        | 0.654999349 | 8.94E-32 | 2 |
| RPS11        | 0.653290753 | 1.45E-31 | 2 |
| CSRP2        | 0.650119516 | 3.53E-31 | 2 |
| FDFT1        | 0.649496371 | 4.19E-31 | 2 |
| TMSB10       | 0.64865681  | 5.29E-31 | 2 |
| STMN1        | 0.646645249 | 9.22E-31 | 2 |
| HN1          | 0.644305581 | 1.75E-30 | 2 |
| YWHAE        | 0.644302479 | 1.75E-30 | 2 |
| SRGAP1       | 0.641516414 | 3.73E-30 | 2 |
| DPYSL3       | 0.639948121 | 5.68E-30 | 2 |
| RPS5         | 0.637258845 | 1.16E-29 | 2 |
| SET          | 0.636746162 | 1.33E-29 | 2 |
| NNAT         | 0.635649028 | 1.78E-29 | 2 |
| NHSL1        | 0.634046008 | 2.72E-29 | 2 |
| RPL3         | 0.633285631 | 3.32E-29 | 2 |
| CXADR        | 0.630893773 | 6.19E-29 | 2 |
| RPS27A       | 0.630858644 | 6.24E-29 | 2 |
| RPL30        | 0.630631191 | 6.62E-29 | 2 |
| NEUROD6      | 0.626944441 | 1.71E-28 | 2 |
| SATB2        | 0.625525712 | 2.46E-28 | 2 |
| SCD          | 0.624705852 | 3.02E-28 | 2 |
| CD24         | 0.622983449 | 4.68E-28 | 2 |
| C17orf76-AS1 | 0.622572436 | 5.19E-28 | 2 |
| RPL37A       | 0.622132372 | 5.79E-28 | 2 |
| TMSB4X       | 0.621832994 | 6.24E-28 | 2 |
| RPL27        | 0.620606307 | 8.49E-28 | 2 |
| TULP4        | 0.620200115 | 9.40E-28 | 2 |
| YBX1         | 0.619475323 | 1.13E-27 | 2 |
| FABP7        | 0.619070618 | 1.24E-27 | 2 |

|         |             |          |   |
|---------|-------------|----------|---|
| GNB2L1  | 0.618029769 | 1.61E-27 | 2 |
| RPL32   | 0.617899226 | 1.66E-27 | 2 |
| RPS15A  | 0.617797007 | 1.71E-27 | 2 |
| RPS6    | 0.617479698 | 1.85E-27 | 2 |
| YWHAZ   | 0.616823095 | 2.17E-27 | 2 |
| HNRNPA1 | 0.61614721  | 2.56E-27 | 2 |
| SLA     | 0.61567908  | 2.88E-27 | 2 |
| RPL34   | 0.611095666 | 8.78E-27 | 2 |
| RPL23   | 0.609306877 | 1.35E-26 | 2 |
| TUBB2B  | 0.608955886 | 1.47E-26 | 2 |
| RPL11   | 0.603178915 | 5.79E-26 | 2 |
| RPL15   | 0.602780704 | 6.35E-26 | 2 |
| DCX     | 0.602381182 | 6.98E-26 | 2 |
| RPL4    | 0.601443231 | 8.69E-26 | 2 |
| ZNF238  | 0.598803063 | 1.60E-25 | 2 |
| SUMO2   | 0.594874893 | 3.96E-25 | 2 |
| NREP    | 0.594821588 | 4.00E-25 | 2 |
| RPSAP58 | 0.590713509 | 1.02E-24 | 2 |
| TMSB15A | 0.589432719 | 1.35E-24 | 2 |
| RPS3A   | 0.588274289 | 1.75E-24 | 2 |
| RPL29   | 0.586193885 | 2.78E-24 | 2 |
| HDAC2   | 0.585610135 | 3.17E-24 | 2 |
| ILF2    | 0.583082462 | 5.52E-24 | 2 |
| RPL8    | 0.58306305  | 5.55E-24 | 2 |
| EIF1    | 0.581119348 | 8.48E-24 | 2 |
| MSMO1   | 0.579562956 | 1.19E-23 | 2 |
| CEP170  | 0.578367    | 1.54E-23 | 2 |
| MLLT11  | 0.577790912 | 1.74E-23 | 2 |
| HMGB1   | 0.577248968 | 1.96E-23 | 2 |
| MN1     | 0.5758445   | 2.64E-23 | 2 |
| POTEE   | 0.574779337 | 3.32E-23 | 2 |
| EZR     | 0.574478156 | 3.54E-23 | 2 |
| RPL35A  | 0.570067249 | 8.97E-23 | 2 |
| C6orf62 | 0.568320627 | 1.29E-22 | 2 |
| CYP51A1 | 0.566805832 | 1.77E-22 | 2 |
| RPL18A  | 0.566483033 | 1.89E-22 | 2 |
| PPP1CB  | 0.565969013 | 2.10E-22 | 2 |
| CRMP1   | 0.561227383 | 5.56E-22 | 2 |
| MEX3A   | 0.559921528 | 7.24E-22 | 2 |
| HMGCR   | 0.559766926 | 7.47E-22 | 2 |
| BCL11A  | 0.559744656 | 7.51E-22 | 2 |
| RPS4X   | 0.559482707 | 7.92E-22 | 2 |
| DDX5    | 0.556866088 | 1.34E-21 | 2 |
| SRSF6   | 0.556794904 | 1.36E-21 | 2 |
| SKA2    | 0.556493664 | 1.44E-21 | 2 |

|           |             |          |   |
|-----------|-------------|----------|---|
| RPL18     | 0.553022849 | 2.88E-21 | 2 |
| H3F3B     | 0.552868007 | 2.97E-21 | 2 |
| LOC649395 | 0.551922246 | 3.58E-21 | 2 |
| SEMA3A    | 0.549523637 | 5.73E-21 | 2 |
| TUBB3     | 0.545269383 | 1.31E-20 | 2 |
| DYNLT1    | 0.544084237 | 1.64E-20 | 2 |
| CDC42     | 0.543354844 | 1.89E-20 | 2 |
| NFIB      | 0.541532873 | 2.68E-20 | 2 |
| EIF3L     | 0.541466463 | 2.71E-20 | 2 |
| STMN2     | 0.53880658  | 4.48E-20 | 2 |
| EEF2      | 0.537244589 | 6.02E-20 | 2 |
| PTPRZ1    | 0.536209078 | 7.30E-20 | 2 |
| DPYSL5    | 0.535689761 | 8.05E-20 | 2 |
| RPS20     | 0.534812283 | 9.48E-20 | 2 |
| RPS8      | 0.534269198 | 1.05E-19 | 2 |
| PAFAH1B2  | 0.531750547 | 1.67E-19 | 2 |
| CASP2     | 0.531194914 | 1.85E-19 | 2 |
| RPL23P8   | 0.530001557 | 2.30E-19 | 2 |
| XRCC5     | 0.529806445 | 2.39E-19 | 2 |
| EIF4G2    | 0.528550838 | 3.00E-19 | 2 |
| RPS24     | 0.52667258  | 4.22E-19 | 2 |
| HNRNPH1   | 0.522576038 | 8.83E-19 | 2 |
| ACAT2     | 0.522412697 | 9.09E-19 | 2 |
| ARF6      | 0.521390278 | 1.09E-18 | 2 |
| RPL10     | 0.520786975 | 1.21E-18 | 2 |
| RPLP1     | 0.520386168 | 1.30E-18 | 2 |
| MEIS2     | 0.5141977   | 3.86E-18 | 2 |
| RAP2B     | 0.513265464 | 4.54E-18 | 2 |
| KLF6      | 0.513062365 | 4.71E-18 | 2 |
| LSM12     | 0.509486556 | 8.71E-18 | 2 |
| EIF4EBP2  | 0.506790419 | 1.38E-17 | 2 |
| EIF2S3    | 0.506662753 | 1.41E-17 | 2 |
| DOK5      | 0.506498229 | 1.45E-17 | 2 |
| RPL6      | 0.503988638 | 2.21E-17 | 2 |
| RPL26     | 0.503844922 | 2.27E-17 | 2 |
| RPL36     | 0.503336685 | 2.47E-17 | 2 |
| OCIAD2    | 0.502134484 | 3.02E-17 | 2 |
| MAPK1IP1L | 0.501437711 | 3.39E-17 | 2 |
| SQLE      | 0.501387494 | 3.42E-17 | 2 |
| RPL10A    | 0.496203988 | 8.06E-17 | 2 |
| SOX5      | 0.495812735 | 8.59E-17 | 2 |
| FAM117B   | 0.494876983 | 1.00E-16 | 2 |
| PAFAH1B3  | 0.49424032  | 1.11E-16 | 2 |
| FOXG1     | 0.493733979 | 1.21E-16 | 2 |
| NFIA      | 0.490586792 | 2.01E-16 | 2 |

|           |             |          |   |
|-----------|-------------|----------|---|
| RAI14     | 0.488982275 | 2.60E-16 | 2 |
| IDH1      | 0.488268317 | 2.91E-16 | 2 |
| PBX1      | 0.486957704 | 3.59E-16 | 2 |
| ZNF286A   | 0.485204684 | 4.74E-16 | 2 |
| NONO      | 0.485042259 | 4.86E-16 | 2 |
| FRMD4B    | 0.484739774 | 5.10E-16 | 2 |
| CBX5      | 0.484342839 | 5.43E-16 | 2 |
| SKIL      | 0.484019247 | 5.71E-16 | 2 |
| BTF3L4    | 0.482373213 | 7.39E-16 | 2 |
| SYNE2     | 0.482319004 | 7.46E-16 | 2 |
| SUMO1     | 0.48209231  | 7.73E-16 | 2 |
| CSNK1A1   | 0.48168501  | 8.23E-16 | 2 |
| PTBP2     | 0.480834549 | 9.40E-16 | 2 |
| MIR100HG  | 0.479479045 | 1.16E-15 | 2 |
| MARCKSL1  | 0.479278569 | 1.20E-15 | 2 |
| RPL39     | 0.479006474 | 1.25E-15 | 2 |
| RPL27A    | 0.477674603 | 1.54E-15 | 2 |
| YWHAQ     | 0.477170871 | 1.66E-15 | 2 |
| RPL19     | 0.475721862 | 2.07E-15 | 2 |
| FNBP1L    | 0.475495422 | 2.15E-15 | 2 |
| SSBP2     | 0.475047209 | 2.30E-15 | 2 |
| RPL7A     | 0.474517947 | 2.49E-15 | 2 |
| CFL1      | 0.474367686 | 2.55E-15 | 2 |
| SF3B14    | 0.472899921 | 3.19E-15 | 2 |
| CAPZA2    | 0.472499922 | 3.39E-15 | 2 |
| RPL14     | 0.472178722 | 3.56E-15 | 2 |
| NELL2     | 0.472165109 | 3.56E-15 | 2 |
| RPL12     | 0.471501217 | 3.94E-15 | 2 |
| CCND2     | 0.470124098 | 4.85E-15 | 2 |
| TTC28     | 0.470121576 | 4.85E-15 | 2 |
| RNF182    | 0.469965664 | 4.97E-15 | 2 |
| RPS2      | 0.467315276 | 7.39E-15 | 2 |
| RPL37     | 0.467201625 | 7.52E-15 | 2 |
| MORF4L1   | 0.466876754 | 7.89E-15 | 2 |
| RPL23A    | 0.466525646 | 8.31E-15 | 2 |
| RPL31     | 0.466093978 | 8.86E-15 | 2 |
| RPL35     | 0.465906763 | 9.11E-15 | 2 |
| VCAN      | 0.465579659 | 9.57E-15 | 2 |
| ZNFX1-AS1 | 0.464666998 | 1.09E-14 | 2 |
| TMEM33    | 0.464081784 | 1.19E-14 | 2 |
| CDV3      | 0.463769071 | 1.25E-14 | 2 |
| ZC2HC1A   | 0.463485714 | 1.30E-14 | 2 |
| WDR83OS   | 0.463150451 | 1.37E-14 | 2 |
| FTL       | 0.461182464 | 1.83E-14 | 2 |
| ENAH      | 0.458339885 | 2.76E-14 | 2 |

|           |             |          |   |
|-----------|-------------|----------|---|
| GDI2      | 0.45553555  | 4.14E-14 | 2 |
| GJC1      | 0.454312311 | 4.93E-14 | 2 |
| SMAD2     | 0.453890848 | 5.24E-14 | 2 |
| KIDINS220 | 0.453853563 | 5.27E-14 | 2 |
| IGF1R     | 0.4537647   | 5.34E-14 | 2 |
| ARF4      | 0.452350677 | 6.53E-14 | 2 |
| ZNF286B   | 0.452313043 | 6.56E-14 | 2 |
| NACA      | 0.452305837 | 6.57E-14 | 2 |
| RAN       | 0.451077624 | 7.82E-14 | 2 |
| POU3F2    | 0.448947367 | 1.06E-13 | 2 |
| FAT3      | 0.4478931   | 1.22E-13 | 2 |
| NKAIN1    | 0.447699977 | 1.26E-13 | 2 |
| RPL24     | 0.446889023 | 1.41E-13 | 2 |
| PABPC1    | 0.446784448 | 1.43E-13 | 2 |
| FAU       | 0.446631141 | 1.46E-13 | 2 |
| TSPAN14   | 0.443963508 | 2.11E-13 | 2 |
| PPIA      | 0.442851631 | 2.46E-13 | 2 |
| ARPC5     | 0.442580172 | 2.56E-13 | 2 |
| RPS7      | 0.442365354 | 2.63E-13 | 2 |
| ETNK1     | 0.441782825 | 2.85E-13 | 2 |
| EPHA3     | 0.441105049 | 3.13E-13 | 2 |
| GPM6A     | 0.440955794 | 3.20E-13 | 2 |
| EEF1B2    | 0.439977582 | 3.65E-13 | 2 |
| TPT1      | 0.439484839 | 3.91E-13 | 2 |
| HSPA8     | 0.438405815 | 4.52E-13 | 2 |
| H2AFZ     | 0.43835738  | 4.55E-13 | 2 |
| BZW1      | 0.438150008 | 4.68E-13 | 2 |
| PSMB6     | 0.437995965 | 4.78E-13 | 2 |
| SNRPF     | 0.437842072 | 4.88E-13 | 2 |
| MAP4K4    | 0.436939444 | 5.52E-13 | 2 |
| GSTP1     | 0.433849644 | 8.36E-13 | 2 |
| SC5DL     | 0.433471482 | 8.79E-13 | 2 |
| CSDE1     | 0.432796646 | 9.62E-13 | 2 |
| EIF3E     | 0.432311726 | 1.03E-12 | 2 |
| SHISA2    | 0.431972108 | 1.07E-12 | 2 |
| CELF2     | 0.431799129 | 1.10E-12 | 2 |
| CLEC2D    | 0.431653356 | 1.12E-12 | 2 |
| FAM126A   | 0.431548408 | 1.14E-12 | 2 |
| WIPF3     | 0.431437105 | 1.15E-12 | 2 |
| ADRA2A    | 0.431217681 | 1.19E-12 | 2 |
| TGFBR1    | 0.430747799 | 1.26E-12 | 2 |
| MASP1     | 0.428269136 | 1.75E-12 | 2 |
| DDX3X     | 0.428237248 | 1.76E-12 | 2 |
| ZNF91     | 0.427569998 | 1.92E-12 | 2 |
| RPSA      | 0.427489591 | 1.94E-12 | 2 |

|           |             |          |   |
|-----------|-------------|----------|---|
| FKBP1A    | 0.427009042 | 2.06E-12 | 2 |
| MAP2      | 0.426012298 | 2.35E-12 | 2 |
| EIF3H     | 0.425875248 | 2.39E-12 | 2 |
| C6orf115  | 0.425260224 | 2.59E-12 | 2 |
| NEUROD2   | 0.42477102  | 2.76E-12 | 2 |
| RPL13     | 0.424373242 | 2.91E-12 | 2 |
| RPLP2     | 0.424083355 | 3.02E-12 | 2 |
| ZNF462    | 0.422870344 | 3.53E-12 | 2 |
| RPS23     | 0.421949332 | 3.98E-12 | 2 |
| TUBA1C    | 0.421817325 | 4.05E-12 | 2 |
| KIF3C     | 0.42148091  | 4.22E-12 | 2 |
| YTHDF2    | 0.421265006 | 4.34E-12 | 2 |
| DYRK2     | 0.420948336 | 4.52E-12 | 2 |
| RPS16     | 0.420762795 | 4.63E-12 | 2 |
| CRIP2     | 0.418776915 | 5.97E-12 | 2 |
| RBMXL1    | 0.418214048 | 6.41E-12 | 2 |
| TOP2B     | 0.417509492 | 7.01E-12 | 2 |
| SRSF10    | 0.416963447 | 7.51E-12 | 2 |
| HNRNPA0   | 0.415631139 | 8.89E-12 | 2 |
| SBK1      | 0.414166028 | 1.07E-11 | 2 |
| MLLT3     | 0.413621467 | 1.14E-11 | 2 |
| MAPRE1    | 0.413507301 | 1.16E-11 | 2 |
| TTC3P1    | 0.412828814 | 1.26E-11 | 2 |
| BACH2     | 0.412707146 | 1.28E-11 | 2 |
| MTHFD2    | 0.412586618 | 1.30E-11 | 2 |
| UBA52     | 0.412353577 | 1.34E-11 | 2 |
| RPS15     | 0.412258203 | 1.36E-11 | 2 |
| MAPRE2    | 0.411188276 | 1.55E-11 | 2 |
| SDCBP     | 0.410252923 | 1.74E-11 | 2 |
| PKIA      | 0.410086739 | 1.77E-11 | 2 |
| C20orf112 | 0.409864079 | 1.82E-11 | 2 |
| TBL1XR1   | 0.405641262 | 3.06E-11 | 2 |
| DCAF7     | 0.404068987 | 3.71E-11 | 2 |
| SYT4      | 0.403502688 | 3.97E-11 | 2 |
| SEMA3C    | 0.403404944 | 4.02E-11 | 2 |
| NKIRAS2   | 0.402960965 | 4.24E-11 | 2 |
| PSMB7     | 0.402092648 | 4.70E-11 | 2 |
| CLIC4     | 0.402044475 | 4.73E-11 | 2 |
| ZNF644    | 0.402031107 | 4.74E-11 | 2 |
| AUTS2     | 0.401958314 | 4.78E-11 | 2 |
| ARPC2     | 0.401879619 | 4.83E-11 | 2 |
| BNIP3L    | 0.401521792 | 5.04E-11 | 2 |
| RAP2A     | 0.401282727 | 5.19E-11 | 2 |
| PER2      | 0.400348589 | 5.80E-11 | 2 |
| HNRNPC    | 0.400078892 | 5.99E-11 | 2 |

|              |              |          |   |
|--------------|--------------|----------|---|
| THRAP3       | 0.399802553  | 6.19E-11 | 2 |
| SMC3         | 0.399679031  | 6.28E-11 | 2 |
| CSNK1E       | 0.398959257  | 6.85E-11 | 2 |
| RHOA         | 0.398715977  | 7.05E-11 | 2 |
| IDI1         | 0.398654462  | 7.10E-11 | 2 |
| PTPRS        | 0.398528579  | 7.21E-11 | 2 |
| ST8SIA2      | 0.398489069  | 7.24E-11 | 2 |
| LOC100506421 | 0.397879245  | 7.79E-11 | 2 |
| PABPC3       | 0.397836214  | 7.83E-11 | 2 |
| HIST1H4C     | 0.39762924   | 8.02E-11 | 2 |
| SNRPD1       | 0.397552001  | 8.09E-11 | 2 |
| HP1BP3       | 0.396801948  | 8.84E-11 | 2 |
| CORO6        | -0.397373179 | 8.27E-11 | 2 |
| SLC12A5      | -0.399175989 | 6.67E-11 | 2 |
| KCNC2        | -0.399666064 | 6.29E-11 | 2 |
| DLX6-AS1     | -0.402412084 | 4.53E-11 | 2 |
| SCG2         | -0.405328855 | 3.18E-11 | 2 |
| GPRASP1      | -0.407682537 | 2.39E-11 | 2 |
| ACSL6        | -0.407880903 | 2.33E-11 | 2 |
| ABCA5        | -0.408675549 | 2.11E-11 | 2 |
| CXCL14       | -0.408980423 | 2.03E-11 | 2 |
| ALDOC        | -0.409100358 | 2.00E-11 | 2 |
| NALCN        | -0.40914666  | 1.99E-11 | 2 |
| NR2C1        | -0.415867731 | 8.62E-12 | 2 |
| SCN1A        | -0.421726492 | 4.09E-12 | 2 |
| OXR1         | -0.426607138 | 2.18E-12 | 2 |
| NRIP3        | -0.426897881 | 2.09E-12 | 2 |
| FAM153B      | -0.429470857 | 1.49E-12 | 2 |
| SPOCK2       | -0.429517616 | 1.49E-12 | 2 |
| OSBPL1A      | -0.433574229 | 8.67E-13 | 2 |
| RNPC3        | -0.438498933 | 4.47E-13 | 2 |
| GABRB2       | -0.446178685 | 1.55E-13 | 2 |
| STEAP2       | -0.447863787 | 1.23E-13 | 2 |
| CKMT1B       | -0.455108574 | 4.40E-14 | 2 |
| SERPINB9     | -0.456328777 | 3.69E-14 | 2 |
| DOCK10       | -0.456346181 | 3.69E-14 | 2 |
| CLU          | -0.459080949 | 2.48E-14 | 2 |
| TSPYL2       | -0.459373702 | 2.38E-14 | 2 |
| MAP7         | -0.46153019  | 1.74E-14 | 2 |
| GABRA1       | -0.466682816 | 8.12E-15 | 2 |
| SYNPR        | -0.473672409 | 2.83E-15 | 2 |
| SPARCL1      | -0.47395648  | 2.71E-15 | 2 |
| CCK          | -0.482844206 | 6.87E-16 | 2 |
| AHI1         | -0.48472386  | 5.11E-16 | 2 |
| ATP1B1       | -0.485895138 | 4.25E-16 | 2 |



|          |              |          |   |
|----------|--------------|----------|---|
| NRXN3    | -0.502307895 | 2.93E-17 | 2 |
| CIT      | -0.502906832 | 2.65E-17 | 2 |
| ERBB4    | -0.504771515 | 1.94E-17 | 2 |
| GAD1     | -0.512622736 | 5.08E-18 | 2 |
| MEG3     | -0.525711806 | 5.02E-19 | 2 |
| UNC80    | -0.53194492  | 1.61E-19 | 2 |
| SLC6A1   | -0.577983079 | 1.67E-23 | 2 |
| TFAP2C   | 0.758295179  | 1.30E-47 | 3 |
| MKI67    | 0.727298916  | 4.25E-42 | 3 |
| GLI3     | 0.725786902  | 7.55E-42 | 3 |
| TOP2A    | 0.703066236  | 2.73E-38 | 3 |
| CDK1     | 0.697755287  | 1.66E-37 | 3 |
| FAM111A  | 0.694096546  | 5.61E-37 | 3 |
| CREB5    | 0.689903547  | 2.22E-36 | 3 |
| BIRC5    | 0.689227689  | 2.77E-36 | 3 |
| TNC      | 0.684696248  | 1.19E-35 | 3 |
| ZFP36L1  | 0.683574631  | 1.70E-35 | 3 |
| RRM2     | 0.679664249  | 5.80E-35 | 3 |
| KIAA0101 | 0.668689121  | 1.66E-33 | 3 |
| NUSAP1   | 0.667709957  | 2.22E-33 | 3 |
| UBE2C    | 0.659985615  | 2.14E-32 | 3 |
| HIST1H1B | 0.657064506  | 4.97E-32 | 3 |
| PAX6     | 0.655133202  | 8.61E-32 | 3 |
| CASC5    | 0.655010303  | 8.92E-32 | 3 |
| SLC1A3   | 0.650980658  | 2.77E-31 | 3 |
| MLF1IP   | 0.649837589  | 3.81E-31 | 3 |
| UHRF1    | 0.629129365  | 9.76E-29 | 3 |
| ECT2     | 0.627767429  | 1.39E-28 | 3 |
| HES1     | 0.624139962  | 3.49E-28 | 3 |
| WEE1     | 0.617347814  | 1.91E-27 | 3 |
| FANCD2   | 0.61588615   | 2.73E-27 | 3 |
| PTTG1    | 0.612124019  | 6.85E-27 | 3 |
| STON2    | 0.603187005  | 5.78E-26 | 3 |
| SOX2     | 0.598424334  | 1.75E-25 | 3 |
| SLCO1C1  | 0.59590845   | 3.12E-25 | 3 |
| EGR1     | 0.591767428  | 8.01E-25 | 3 |
| HIST1H1C | 0.591225469  | 9.05E-25 | 3 |
| ZFHX4    | 0.585263987  | 3.42E-24 | 3 |
| GPR98    | 0.585154827  | 3.50E-24 | 3 |
| HMGB2    | 0.585137053  | 3.52E-24 | 3 |
| NOTCH2   | 0.583131014  | 5.46E-24 | 3 |
| AURKB    | 0.582714369  | 5.98E-24 | 3 |
| SGOL1    | 0.579046225  | 1.33E-23 | 3 |
| NDC80    | 0.578160047  | 1.61E-23 | 3 |
| MELK     | 0.576121135  | 2.49E-23 | 3 |

|          |             |          |   |
|----------|-------------|----------|---|
| KIF23    | 0.57607298  | 2.52E-23 | 3 |
| CYR61    | 0.575250959 | 3.00E-23 | 3 |
| DUSP10   | 0.573311387 | 4.53E-23 | 3 |
| NBPF10   | 0.573224191 | 4.61E-23 | 3 |
| PDPN     | 0.573171443 | 4.67E-23 | 3 |
| GNG5     | 0.57196567  | 6.02E-23 | 3 |
| HJURP    | 0.571049994 | 7.30E-23 | 3 |
| ZIC2     | 0.570603323 | 8.02E-23 | 3 |
| DACH1    | 0.56999477  | 9.11E-23 | 3 |
| CENPF    | 0.567785168 | 1.44E-22 | 3 |
| CENPK    | 0.564467979 | 2.87E-22 | 3 |
| KIF15    | 0.5640174   | 3.14E-22 | 3 |
| SMC4     | 0.563583743 | 3.44E-22 | 3 |
| PBK      | 0.562144947 | 4.61E-22 | 3 |
| PRDM16   | 0.561629338 | 5.12E-22 | 3 |
| TPX2     | 0.561584371 | 5.17E-22 | 3 |
| GMNN     | 0.560808669 | 6.05E-22 | 3 |
| MIS18BP1 | 0.560512333 | 6.43E-22 | 3 |
| RFTN2    | 0.559791693 | 7.44E-22 | 3 |
| HIST1H1E | 0.559685543 | 7.60E-22 | 3 |
| LTBP1    | 0.559063436 | 8.62E-22 | 3 |
| ZWINT    | 0.558562091 | 9.53E-22 | 3 |
| ESCO2    | 0.556892858 | 1.33E-21 | 3 |
| SKA3     | 0.555182394 | 1.88E-21 | 3 |
| PRR11    | 0.554556468 | 2.12E-21 | 3 |
| F3       | 0.553097173 | 2.84E-21 | 3 |
| NBPF14   | 0.550312215 | 4.91E-21 | 3 |
| ASPM     | 0.549953594 | 5.27E-21 | 3 |
| CCNB2    | 0.543709883 | 1.77E-20 | 3 |
| KNTC1    | 0.543693846 | 1.77E-20 | 3 |
| C21orf58 | 0.542280799 | 2.32E-20 | 3 |
| TAGLN2   | 0.542071818 | 2.41E-20 | 3 |
| GPX3     | 0.541474255 | 2.71E-20 | 3 |
| BRIP1    | 0.541043709 | 2.94E-20 | 3 |
| PON2     | 0.536733651 | 6.62E-20 | 3 |
| MLC1     | 0.535036038 | 9.09E-20 | 3 |
| SALL3    | 0.533893422 | 1.12E-19 | 3 |
| CLSPN    | 0.533154737 | 1.29E-19 | 3 |
| PTN      | 0.532649334 | 1.42E-19 | 3 |
| NUF2     | 0.53210355  | 1.57E-19 | 3 |
| MMS22L   | 0.531133794 | 1.87E-19 | 3 |
| PTTG3P   | 0.531073391 | 1.89E-19 | 3 |
| CENPN    | 0.530260791 | 2.20E-19 | 3 |
| DIAPH3   | 0.528155751 | 3.23E-19 | 3 |
| NOTCH3   | 0.527212974 | 3.83E-19 | 3 |

|           |             |          |   |
|-----------|-------------|----------|---|
| SGOL2     | 0.526625936 | 4.26E-19 | 3 |
| CDK2      | 0.526597311 | 4.28E-19 | 3 |
| SFRP1     | 0.524917734 | 5.80E-19 | 3 |
| SOCS3     | 0.524605485 | 6.13E-19 | 3 |
| DMRTA2    | 0.52425176  | 6.54E-19 | 3 |
| S1PR1     | 0.524062239 | 6.76E-19 | 3 |
| TRIM59    | 0.52066437  | 1.24E-18 | 3 |
| KIF11     | 0.517296059 | 2.25E-18 | 3 |
| CEP152    | 0.516795885 | 2.46E-18 | 3 |
| SOX9      | 0.516604885 | 2.54E-18 | 3 |
| EOMES     | 0.516300452 | 2.68E-18 | 3 |
| DLGAP5    | 0.515796303 | 2.93E-18 | 3 |
| MYO10     | 0.515353616 | 3.16E-18 | 3 |
| FAM64A    | 0.514837174 | 3.46E-18 | 3 |
| PDLIM3    | 0.513977563 | 4.02E-18 | 3 |
| TMEM98    | 0.512280284 | 5.39E-18 | 3 |
| CDKN3     | 0.511064497 | 6.64E-18 | 3 |
| IQGAP3    | 0.509024095 | 9.43E-18 | 3 |
| ANP32E    | 0.508069367 | 1.11E-17 | 3 |
| FOS       | 0.505677667 | 1.67E-17 | 3 |
| NEK2      | 0.504076472 | 2.18E-17 | 3 |
| BUB1      | 0.503300998 | 2.48E-17 | 3 |
| KIF4A     | 0.502652448 | 2.77E-17 | 3 |
| DHFR      | 0.502436626 | 2.87E-17 | 3 |
| BMP7      | 0.50141545  | 3.41E-17 | 3 |
| CHD7      | 0.500153538 | 4.20E-17 | 3 |
| MFAP2     | 0.499494659 | 4.69E-17 | 3 |
| TK1       | 0.499284653 | 4.85E-17 | 3 |
| CKS2      | 0.499077742 | 5.02E-17 | 3 |
| MOXD1     | 0.496683264 | 7.45E-17 | 3 |
| ATAD2     | 0.496360409 | 7.86E-17 | 3 |
| PMP2      | 0.493487052 | 1.26E-16 | 3 |
| LITAF     | 0.492983688 | 1.36E-16 | 3 |
| HMGN5     | 0.492790964 | 1.41E-16 | 3 |
| E2F8      | 0.490911792 | 1.90E-16 | 3 |
| JUND      | 0.490567112 | 2.01E-16 | 3 |
| CNTLN     | 0.490486115 | 2.04E-16 | 3 |
| PRC1      | 0.490295798 | 2.10E-16 | 3 |
| TP53      | 0.490084243 | 2.18E-16 | 3 |
| NCAPH     | 0.489408784 | 2.42E-16 | 3 |
| PHLDA1    | 0.489043968 | 2.57E-16 | 3 |
| LOC284454 | 0.488333696 | 2.88E-16 | 3 |
| VIM       | 0.487732175 | 3.17E-16 | 3 |
| SDC4      | 0.486210304 | 4.04E-16 | 3 |
| DOCK1     | 0.484672055 | 5.15E-16 | 3 |

|          |             |          |   |
|----------|-------------|----------|---|
| C8orf4   | 0.484260917 | 5.50E-16 | 3 |
| CD9      | 0.483060685 | 6.64E-16 | 3 |
| MCM3     | 0.483007488 | 6.69E-16 | 3 |
| ZEB1     | 0.482812004 | 6.90E-16 | 3 |
| CENPM    | 0.482286746 | 7.50E-16 | 3 |
| GTSE1    | 0.475340918 | 2.20E-15 | 3 |
| MSI1     | 0.475098064 | 2.28E-15 | 3 |
| NKAIN3   | 0.474120841 | 2.65E-15 | 3 |
| B2M      | 0.471298997 | 4.06E-15 | 3 |
| JUN      | 0.470210131 | 4.79E-15 | 3 |
| CDCA3    | 0.469735844 | 5.14E-15 | 3 |
| TEAD2    | 0.469586256 | 5.26E-15 | 3 |
| MAFF     | 0.469193719 | 5.58E-15 | 3 |
| BRCA1    | 0.468882581 | 5.85E-15 | 3 |
| COL11A1  | 0.468307135 | 6.37E-15 | 3 |
| HIST1H3C | 0.466884947 | 7.88E-15 | 3 |
| CDC20    | 0.466761128 | 8.03E-15 | 3 |
| MAD2L1   | 0.4666278   | 8.19E-15 | 3 |
| TTK      | 0.463166854 | 1.37E-14 | 3 |
| TIMELESS | 0.462570995 | 1.49E-14 | 3 |
| CENPE    | 0.460908926 | 1.90E-14 | 3 |
| CDCA8    | 0.458528561 | 2.69E-14 | 3 |
| MEIS1    | 0.458127375 | 2.85E-14 | 3 |
| ATF3     | 0.458125727 | 2.85E-14 | 3 |
| ZFP36L2  | 0.457964681 | 2.92E-14 | 3 |
| AASS     | 0.456905046 | 3.40E-14 | 3 |
| RAD51AP1 | 0.455546988 | 4.13E-14 | 3 |
| CDC25C   | 0.455531342 | 4.14E-14 | 3 |
| TMX1     | 0.454777813 | 4.62E-14 | 3 |
| SPC25    | 0.454084518 | 5.10E-14 | 3 |
| CAPG     | 0.451726457 | 7.13E-14 | 3 |
| PARBPB   | 0.4515367   | 7.32E-14 | 3 |
| NEIL3    | 0.451255881 | 7.62E-14 | 3 |
| GAB1     | 0.450994472 | 7.91E-14 | 3 |
| E2F2     | 0.449570574 | 9.67E-14 | 3 |
| FABP5    | 0.449389373 | 9.92E-14 | 3 |
| ANLN     | 0.449117542 | 1.03E-13 | 3 |
| CKS1B    | 0.448683282 | 1.10E-13 | 3 |
| FOSB     | 0.447809672 | 1.24E-13 | 3 |
| FOXO1    | 0.447448178 | 1.30E-13 | 3 |
| MYADM    | 0.446951729 | 1.40E-13 | 3 |
| HSDL2    | 0.446294561 | 1.53E-13 | 3 |
| CTNNA1   | 0.445892454 | 1.62E-13 | 3 |
| BUB1B    | 0.445436464 | 1.72E-13 | 3 |
| COL4A5   | 0.444273481 | 2.02E-13 | 3 |

|              |             |          |   |
|--------------|-------------|----------|---|
| ITGB8        | 0.441066247 | 3.15E-13 | 3 |
| PDLIM5       | 0.437640061 | 5.02E-13 | 3 |
| ACBD7        | 0.437396129 | 5.19E-13 | 3 |
| CXCL2        | 0.437192096 | 5.33E-13 | 3 |
| TGIF2        | 0.43714723  | 5.36E-13 | 3 |
| NEDD1        | 0.437077889 | 5.41E-13 | 3 |
| ID4          | 0.437039488 | 5.44E-13 | 3 |
| BRCA2        | 0.436282588 | 6.03E-13 | 3 |
| LOC100507206 | 0.436219018 | 6.08E-13 | 3 |
| KIF2C        | 0.435422527 | 6.77E-13 | 3 |
| LPAR4        | 0.434273846 | 7.89E-13 | 3 |
| THBS2        | 0.433717349 | 8.50E-13 | 3 |
| E2F7         | 0.433233    | 9.07E-13 | 3 |
| SOX6         | 0.43290859  | 9.47E-13 | 3 |
| TRPS1        | 0.432244074 | 1.04E-12 | 3 |
| HIST1H1A     | 0.432184555 | 1.04E-12 | 3 |
| EMP3         | 0.430886137 | 1.24E-12 | 3 |
| ARHGEF6      | 0.429923895 | 1.41E-12 | 3 |
| SAMD9L       | 0.429561682 | 1.48E-12 | 3 |
| ATP1A2       | 0.429561263 | 1.48E-12 | 3 |
| SMC2         | 0.429402723 | 1.51E-12 | 3 |
| IQGAP2       | 0.428861606 | 1.62E-12 | 3 |
| LGALS3       | 0.427831721 | 1.85E-12 | 3 |
| MCM10        | 0.427446541 | 1.95E-12 | 3 |
| CKAP2        | 0.427225748 | 2.01E-12 | 3 |
| CHEK1        | 0.42695071  | 2.08E-12 | 3 |
| ARHGAP11A    | 0.426873368 | 2.10E-12 | 3 |
| FSTL1        | 0.426580069 | 2.18E-12 | 3 |
| FAM114A1     | 0.425289113 | 2.58E-12 | 3 |
| FAT1         | 0.424615922 | 2.82E-12 | 3 |
| FAM83D       | 0.424478248 | 2.87E-12 | 3 |
| KCNJ2        | 0.423438429 | 3.28E-12 | 3 |
| YAP1         | 0.420616177 | 4.72E-12 | 3 |
| FAIM         | 0.419909348 | 5.17E-12 | 3 |
| STAT3        | 0.419065996 | 5.75E-12 | 3 |
| KIF20A       | 0.418654746 | 6.06E-12 | 3 |
| SPATA13      | 0.417014413 | 7.46E-12 | 3 |
| IER2         | 0.415385652 | 9.16E-12 | 3 |
| MSN          | 0.415381231 | 9.17E-12 | 3 |
| GFAP         | 0.415355421 | 9.20E-12 | 3 |
| MEGF10       | 0.415279297 | 9.29E-12 | 3 |
| CSF1         | 0.414626213 | 1.01E-11 | 3 |
| NFKBIZ       | 0.414334579 | 1.05E-11 | 3 |
| SPARC        | 0.414139003 | 1.07E-11 | 3 |
| SFRP2        | 0.413033457 | 1.23E-11 | 3 |

|          |              |          |   |
|----------|--------------|----------|---|
| HEG1     | 0.412232073  | 1.36E-11 | 3 |
| GYPC     | 0.412026183  | 1.40E-11 | 3 |
| LIPG     | 0.410580769  | 1.67E-11 | 3 |
| AXL      | 0.409284681  | 1.96E-11 | 3 |
| RAB13    | 0.408692624  | 2.11E-11 | 3 |
| CNN3     | 0.40761188   | 2.41E-11 | 3 |
| NFIC     | 0.404033074  | 3.72E-11 | 3 |
| CENPO    | 0.403551178  | 3.95E-11 | 3 |
| PSAT1    | 0.402940463  | 4.25E-11 | 3 |
| RGS16    | 0.402724406  | 4.36E-11 | 3 |
| MFAP4    | 0.402226672  | 4.63E-11 | 3 |
| HMG2     | 0.402028136  | 4.74E-11 | 3 |
| CYBRD1   | 0.400960433  | 5.39E-11 | 3 |
| RFX4     | 0.400824183  | 5.48E-11 | 3 |
| NCAPG    | 0.400312681  | 5.83E-11 | 3 |
| SKA1     | 0.399671975  | 6.29E-11 | 3 |
| WDR76    | 0.3996157    | 6.33E-11 | 3 |
| MCM2     | 0.398958802  | 6.85E-11 | 3 |
| CHEK2    | 0.395793073  | 9.96E-11 | 3 |
| MIAT     | -0.395915232 | 9.82E-11 | 3 |
| GAP43    | -0.397035423 | 8.60E-11 | 3 |
| CHL1     | -0.402210866 | 4.64E-11 | 3 |
| NELL2    | -0.406300197 | 2.83E-11 | 3 |
| RBFOX1   | -0.414711229 | 9.97E-12 | 3 |
| LRRC7    | -0.417644852 | 6.89E-12 | 3 |
| PTPRD    | -0.419440846 | 5.48E-12 | 3 |
| DLG2     | -0.426231956 | 2.28E-12 | 3 |
| KIAA1598 | -0.428942816 | 1.60E-12 | 3 |
| MAPT     | -0.438666743 | 4.37E-13 | 3 |
| GRIA2    | -0.450730729 | 8.21E-14 | 3 |
| SLC38A1  | -0.458832639 | 2.57E-14 | 3 |
| NEUROD6  | -0.466514467 | 8.33E-15 | 3 |
| SATB2    | -0.470925737 | 4.30E-15 | 3 |
| RUNX1T1  | -0.491603902 | 1.70E-16 | 3 |
| MYT1L    | -0.537805403 | 5.41E-20 | 3 |
| STMN2    | -0.585139874 | 3.51E-24 | 3 |
| MEF2C    | -0.612752325 | 5.88E-27 | 3 |

**Table S6.** List of antibodies used in the study.

| Antigen name | Species | Dilution | Vendor      | Catalog # |
|--------------|---------|----------|-------------|-----------|
| CPLX3        | Rabbit  | 1:50     | AbCam       | ab107063  |
| NeuN         | Rabbit  | 1:1000   | Millipore   | ABN78     |
| NeuN         | Mouse   | 1:1000   | Millipore   | MAB377    |
| PVALB        | Mouse   | 1:500    | Swant       | 235       |
| CALB2        | Goat    | 1:500    | Swant       | CG1       |
| VIP          | Rabbit  | 1:100    | Santa Cruz  | sc-20727  |
| CRHBP        | Goat    | 1:200    | R&D systems | AF2796    |
| SOX6         | Rabbit  | 1:500    | AbCam       | ab30455   |
